# Supplementary material for: Diversity of intact polar lipids in the oxygen minimum zone of the Eastern Tropical North Pacific: Biogeochemical implications of non-phosphorus lipids
Source: Copernicus journal article supplement (doi:10.5194/bg-2018-119), 2018-03-13

1 **Diversity of intact polar lipids in the oxygen minimum zone of the Eastern Tropical North Pacific:**  
2 **Biogeochemical implications of non-phosphorus lipids**

3 Florence Schubotz <sup>1\*</sup>, Sitan Xie <sup>1,¶</sup>, Julius S. Lipp <sup>1</sup>, Kai-Uwe Hinrichs <sup>1</sup>, Stuart G. Wakeham <sup>2</sup>

4

5

6 <sup>1</sup>MARUM and Department of Geosciences, University of Bremen, 28359 Bremen, Germany

7 <sup>2</sup>Skidaway Institute of Oceanography, Savannah, GA 31411, USA

8 <sup>¶</sup>Current address: Wai Gao Qiao Free Trade Zone, 200131 Shanghai, China

9

10

11

12

13

14

15

16

17 \*Corresponding author. MARUM, University of Bremen, Leobener Str. 13, Room 1070, 28359 Bremen,  
18 Germany. Tel: +49-421-218-65724. Fax: +49-421-218-65715. E-mail: [schubotz@uni-bremen.de](mailto:schubotz@uni-bremen.de)

19

20 **Keywords:** intact polar lipids, phospholipids, glycolipids, betaine lipids, ether lipids, oxylipins,  
21 phospholipid substitution, oxygen minimum zone

## 22 **Abstract**

23 Intact polar lipids (IPLs) are the main building blocks of cellular membranes and contain  
24 chemotaxonomic, ecophysiological and metabolic information, making them valuable biomarkers in  
25 microbial ecology and biogeochemistry. This study investigates IPLs in suspended particulate matter  
26 (SPM) in the water column of the Eastern Tropical North Pacific Ocean (ETNP), one of the most extensive  
27 open ocean oxygen minimum zones (OMZ) in the world with strong gradients of nutrients, temperature  
28 and redox conditions. A wide structural variety in polar lipid head group composition and core structures  
29 exists along physical and geochemical gradients within the OMZ. We use this structural diversity in  
30 IPLs to evaluate the microbial ecology and ecophysiological adaptations that affect organisms inhabiting  
31 the mid-depth OMZ in the context of biogeochemical cycles. Diacylglycerol phospholipids are present  
32 at all depths, but exhibit highest relative abundance and compositional variety (including mixed acyl/ether  
33 core structures) in the upper and core OMZ where prokaryotic biomass was enriched. Surface ocean  
34 SPM is dominated by diacylglycerol glycolipids that are found in photosynthetic membranes. These and  
35 other glycolipids with varying core structures composed of ceramides and hydroxylated fatty acids are  
36 also detected with varying relative abundances in the OMZ and deep oxycline, signifying additional non-  
37 phototrophic bacterial sources for these lipids. Betaine lipids (with zero or multiple hydroxylations in  
38 the core structures) that are typically assigned to microalgae are found throughout the water column down  
39 to the deep oxycline but do not show a depth-related trend in relative abundance. Archaeal IPLs  
40 comprised of glycosidic and mixed glycosidic-phosphatidic glycerol dibiphytanyl glycerol tetraethers  
41 (GDGTs) are most abundant in the upper OMZ where nitrate maxima point to ammonium oxidation, but  
42 increase in relative abundance in the core OMZ and deep oxycline. Abundant non-phosphorus

43 “substitute” lipids within the OMZ suggest that the indigenous microbes might be phosphorus limited (P  
44 starved) at ambient phosphate concentrations of 1 to 3.5  $\mu\text{M}$ , although specific microbial sources for many  
45 of these lipids still remain unknown.

## 46 **1. Introduction**

47 Oxygen Minimum Zones (OMZ) are permanently oxygen-deficient regions in the ocean defined by  
48 O<sub>2</sub> concentrations <20 μM. They occur in areas where coastal or open ocean upwelling of cold, nutrient-  
49 rich waters drive elevated levels of primary production and the subsequent respiration of organic matter  
50 exported out of productive surface waters consumes oxygen faster than it is replaced by ventilation or by  
51 mid-depth lateral injections of oxygenated water. Low oxygen levels cause habitat compression,  
52 whereby species intolerant to low levels of oxygen are restricted to oxygenated surface waters (Keeling  
53 et al., 2010; Rush et al., 2012). But even these low levels of oxygen permit vertical migration of some  
54 zooplankton taxa into hypoxic waters (e.g., Seibel, 2011; Wishner et al., 2013). Oxygen depletion  
55 stimulates diverse microbial life capable of utilizing alternative electron acceptors for respiration under  
56 microaerobic conditions (e.g., Ulloa et al., 2012; Tiano et al., 2014; Carolan et al., 2015; Kalvelage et al.,  
57 2015; Duret et al., 2015). Important prokaryote-mediated processes within OMZs include denitrification  
58 and the anaerobic oxidation of ammonium (anammox), which together may account for 30-50% of the  
59 total nitrogen loss from the ocean to the atmosphere (Gruber, 2008; Lam and Kuypers, 2011). Modern  
60 day OMZs comprise ~8% of global ocean volume (Karstensen et al., 2008; Paulmier and Ruiz-Pino, 2009;  
61 Lam and Kuypers, 2011), but any expansion in the coming decades as a consequence of global warming  
62 and increased stratification (Stramma et al., 2008; Keeling et al., 2010) would have profound effects on  
63 marine ecology, oceanic productivity, global carbon and nitrogen cycles, the biological pump and  
64 sequestration of carbon (Karstensen et al., 2008; Stramma et al., 2010; Wright et al., 2012). A better  
65 understanding of the effect of low-O<sub>2</sub> on marine biogeochemistry and microbial ecology is thus warranted.

66 The Eastern Tropical North Pacific Ocean (ETNP), situated off the west coast of Mexico and Central  
67 America, hosts one of the largest OMZs in the open ocean, extending halfway across the Pacific Ocean  
68 and comprising ~41% of global OMZs (Lavin and Fiedler, 2006; Fiedler and Talley, 2006; Paulmier and  
69 Ruiz-Pino, 2009). By comparison, OMZs of the Eastern Tropical South Pacific Ocean off Peru and Chile  
70 and in the Arabian Sea are ~14% and ~8%, respectively, of global OMZs. In the ETNP, a sharp  
71 permanent pycnocline develops where warm, saline surface waters lie on top of a shallow thermocline,  
72 producing a highly stratified water column. Moderate primary production, dominated by picoplankton,  
73 depends on oceanic upwelling and wind mixing of coastal waters but is generally limited by the lack of  
74 micronutrient dissolved iron (Franck et al., 2005; Pennington et al., 2006). Remineralization, ~70% of  
75 which is microbially mediated (Cavan et al., 2017), of particulate organic carbon exported out of surface  
76 waters consumes oxygen at rates that cannot be balanced by ventilation across the pycnocline and by  
77 sluggish lateral circulation, leading to O<sub>2</sub> levels <2 μM at depths between ~100 and ~800 m.  
78 Abundances of micro- (Olson and Daly, 2013) and macro-zooplankton (Wishner et al., 2013; Williams et  
79 al., 2014) that are high in surface waters are reduced in the OMZ, and those macrozooplankton that are  
80 diel vertical migrators survive in the OMZ with reduced metabolic rates (Maas et al., 2014; Cass and Daly,  
81 2015). Microbial abundances and activities for both heterotrophic and chemoautotrophic metabolisms  
82 are high in both surface waters and within the OMZ, but again with reduced metabolic rates in the OMZ  
83 (Podlaska et al., 2012). A strong nutricline indicates microbial nitrogen cycling involving co-occurring  
84 nitrification, denitrification and anammox (Rush et al., 2012; Podlaska et al., 2012), perhaps contributing  
85 up to 45% of the global pelagic denitrification (Codispoti and Richards, 1976). Microbial communities  
86 are mainly comprised of proteobacteria, with increasing contributions of archaea in deeper waters. Yet, on

87 average ca. 50% of the prokaryotic communities within the OMZ of the ETNP remained uncharacterized  
88 (Podlaska et al., 2012).

89 Intact polar lipids (IPLs) are the main building blocks of cellular membranes and may be used to  
90 characterize abundance and physiology of aquatic microorganisms from all three domains of life. IPLs  
91 represent a diverse range of molecular structures, including phosphatidyl, glycosidic, phospho-glycosidic,  
92 and amino acid polar head groups linked to glyceryl-acyl and glyceryl-*O*-alkyl apolar moieties. IPL  
93 distributions have been documented in surface waters of the Eastern Subtropical South Pacific (Van Mooy  
94 and Fredricks, 2010), the Western North Atlantic Ocean (Van Mooy et al., 2006; 200; Pependorf et al.,  
95 2011a), the South Pacific Ocean (Kharbush et al., 2016), the Mediterranean Sea (Pependorf, et al., 2011b),  
96 the North Sea (Brandsma et al., 2012), lakes (Bale et al., 2016), the Western English Channel (White et  
97 al., 2015) and throughout the water columns of stratified water bodies (Ertefai et al., 2008; Schubotz et  
98 al., 2009; Wakeham et al., 2012; Pitcher et al., 2011; Xie et al., 2014; Basse et al., 2014; Sollai et al., 2015).  
99 Surface waters are typically dominated by nine IPL classes. Three diacylglycerol glycolipids,  
100 monoglycosyl (1G-), diglycosyl (2G-) and sulfoquinovosyl diacylglycerol (SQ-DAG), are main IPLs  
101 found in all thylakoid membranes of phototrophs, including those of cyanobacteria (Siegenthaler et al.,  
102 1998)<sup>1</sup>. Three betaine lipids, diacylglyceryl homoserine (DGTS), hydroxymethyl-trimethyl- $\beta$ -alanine  
103 (DGTA) and carboxy-*N*-hydroxymethyl-choline (DGCC), are also generally abundant. Betaine lipids  
104 are widely distributed in lower plants and green algae (Dembitsky, 1996) and are thus usually assigned to

---

<sup>1</sup> Elsewhere in the literature 1G-DAG, 2G-DAG, and SQ-DAG are also termed MGDG, DGDG and SQDG. However, we have opted to retain the 1G-DAG, 2-DAG, etc. nomenclature as other IPLs discussed throughout also contain monoglycosyl- and diglycosyl-moieties (e.g., 1G-GDGT and 2G-GDGT). Likewise, we retain the nomenclature PC-DAG, PE-DAG, and PG-DAG for phospholipids elsewhere termed PC, PE, PG.

105 eukaryotic algae in the ocean (Popendorf, et al., 2011a), but DGTS was recently also found in bacteria  
106 when phosphorus is limited (Yao et al., 2015; Sebastian et al. 2016). Three common detected  
107 phospholipids are diacylglycerol phosphatidyl choline (PC-DAG; often simply referred to elsewhere as  
108 PC), phosphatidyl ethanolamine (PE-DAG, often PE), and phosphatidyl glycerol (PG-DAG, often PG),  
109 all of which have mixed eukaryotic or bacterial sources in the upper water column (Sohlenkamp et al.,  
110 2003; Popendorf, et al., 2011a). Microbial source assignments have been broadly confirmed by isotope  
111 labeling studies (Popendorf, et al., 2011a). In oxygen-deficient subsurface waters IPL distributions are  
112 more diverse and other phospholipids such as diacylglycerol phosphatidyl (*N*)-methylethanolamine  
113 (PME-DAG), phosphatidyl (*N,N*)-dimethylethanolamine (PDME-DAG) and diphosphatidyl glycerol  
114 (DPG) increase in abundance; these IPLs occur in a number of bacteria that may inhabit low oxygen  
115 environments (Schubotz et al., 2009; Wakeham et al., 2012). Dietherglycerol phospholipids and  
116 glycosidic ceramides with unidentified sources have also been detected (Schubotz et al., 2009; Wakeham  
117 et al., 2012), the latter have been recently observed to be abundant in phosphorus-limited diatoms (Hunter  
118 et al., 2018). IPLs that are unique to marine archaea are comprised of glycerol dialkyl glycerol tetraethers  
119 (GDGT) core lipids with various glycosidic, diglycosidic and mixed phospho-glyco polar head groups  
120 (e.g., Schouten et al., 2008; Pitcher et al., 2011; Zhu et al., 2016; Elling et al., 2017). Abundances of  
121 archaeal IP-GDGTs vary considerably with depth, but are typically elevated in zones of water column  
122 oxygen depletion, especially where ammonium oxidizing thaumarchaea are abundant (Pitcher et al., 2011;  
123 Schouten et al., 2012; Sollai et al., 2015).

124 IPL can also be indicators of metabolic and physiologic status. Many organisms remodel their IPL  
125 composition when faced with environmental stressors such as changes in pH, salinity, temperature or

126 availability of nutrients (Zhang and Rock, 2008; Van Mooy et al., 2009; Meador et al., 2014; Carini et al.,  
127 2015; Elling et al., 2015). Replacing phospholipids with non-phosphorus containing substitute lipids is  
128 an important mechanism when facing nutrient phosphate starvation in oligotrophic surface waters where  
129 phosphate concentrations may be as low as nanomolar levels. Cyanobacteria replace PG-DAG with SQ-  
130 DAG (Benning et al., 1993; Van Mooy et al., 2006) and microalgae and some bacteria replace PC-DAG  
131 with DGTS (Geiger et al., 1999; Van Mooy et al., 2009; Pependorf, et al., 2011b) due to their similar ionic  
132 charge at physiological pH. Heterotrophic marine bacteria can replace PE-DAG with either 1G-DAG or  
133 DGTS (Carini et al., 2015; Sebastian et al., 2016; Yao et al., 2015). Notably, substitute lipids are also  
134 biosynthesized under micromolar concentrations of phosphate (Bosak et al., 2016).

135 Here, we use IPL distributions in suspended particulate matter (SPM) to characterize eukaryotic,  
136 bacterial and archaeal communities inhabiting the OMZ of the ETNP. This study is an extension of that  
137 of Xie et al. (2014), which focused on the distribution of core and intact polar archaeal and bacterial  
138 tetraether lipids at two stations investigated here (stations 1 and 8). The water column of the ETNP  
139 comprises distinct biogeochemical zones based on oxygen concentrations and IPL distributions reflect the  
140 localized ecology. Abundant non-phosphorus substitute lipids within the core of the OMZ suggest  
141 phosphorus limitation of the source microorganisms even at micromolar concentrations of phosphate.  
142 Overall our results provide deeper insight into the broad community composition and the physiologic state  
143 of microorganisms inhabiting OMZs.

144

## 145 **2. Methods**

### 146 *2.1 Sample collection and CTD data*



147 Suspended particulate matter (SPM) samples were collected at four stations (distance to shore:  
148 400~600 km; Fig 1) along a northwest-southeast transect (Station 1: 13° 01.87'N, 104° 99.83'W; Station  
149 2: 11° 99.96' N, 101° 22.82' W; Station 5: 10° 68.94' N, 96° 34.12' W; and Station 8: 8° 99.46'N,  
150 90°00.18'W) in the ETNP during the R/V *Seward Johnson* cruise in November 2007 (R/V *Seward Johnson*  
151 Cruise Scientists, 2007). Station 1 in the Tehuantepec Bowl is an area of relatively low primary  
152 productivity (e.g., 0.05 mg Chl-*a*/m<sup>2</sup>; (Fiedler and Talley, 2006; Pennington et al., 2006) whereas Station  
153 8 in the Costa Rica Dome is moderately productive (1 mg Chl-*a*/m<sup>2</sup>). All stations are characterized by a  
154 strong thermocline/pycnocline/oxycline (at 20-50 m depths depending on location) and a profound and  
155 thick OMZ (down to ~2 μM O<sub>2</sub> between ~300-800 m depth). Station 1 is a reoccupation of the Vertical  
156 Transport and Exchange II/III site from the early 1980's (Lee and Cronin, 1984; Martin et al., 1987;  
157 Wakeham and Canuel, 1988; Wakeham, 1987, 1989).

158 Seawater was filtered *in-situ* using submersible pumps (McLane Research Laboratories WTS-142  
159 filtration systems) deployed on the conducting cable of the CTD/rosette that measured temperature,  
160 conductivity, oxygen, fluorescence/chlorophyll-*a* and transmissivity during pump deployments and  
161 during pumping. Filtered water volumes ranged between 130 and 1800 L (Suppl. Table 1). Pumps  
162 were fitted with two-tier 142 mm diameter filter holders: a 53 μm mesh Nitex “prefiltration” screen to  
163 remove larger eukaryotes and marine snow aggregates and a double-stacked tier of ashed glass fiber filters  
164 (142 mm Gelman type A/E, nominal pore size 0.7 μm). IPL concentrations we report represent minimum  
165 values to reflect potentially inefficient collection of 0.7 μm particles by GFFs. Since pore size of the  
166 filters may also decrease during filtration the recovered material may vary dependent on filtration time.

167 Following pump recovery, GFF filters and Nitex screens were wrapped in pre-combusted foil and stored  
168 frozen at -20°C until extraction.

169

## 170 *2.2 Elemental, pigment and nutrient analysis*

171 Particulate organic carbon (POC) and total particulate nitrogen (TN) were measured on 14 mm-  
172 diameter subsamples of each glass fiber filter (GFF) prior to lipid extraction; therefore, POC and TN  
173 concentrations reported here are only for <53 µm material. The plugs were acidified in HCl vapor in a  
174 desiccator for 12 hours to remove inorganic carbon. Elemental analysis was performed with a  
175 ThermoFinnigan Flash EA Series 1112 interfaced to a ThermoFinnigan Delta V isotope ratio mass  
176 spectrometer at the Skidaway Institute Scientific Stable Isotope Laboratory. Organic carbon and  
177 nitrogen contents were calibrated against internal laboratory chitin powder standards which in turn had  
178 previously been cross-calibrated against USGS 40 and 41 international standards.

179 Chlorophyll-*a* (Chl-*a*) and pheopigment concentrations were measured on-board the ship (Olson and  
180 Daly, 2013). Seawater samples (100 – 500 ml) from CTD casts were filtered onto Whatman GF/F filters  
181 (0.7 µm) which were immediately extracted with 90% acetone. Fluorescence was measured with a  
182 Turner Designs 10AU fluorometer and Chl-*a* concentrations were determined after Parsons et al (1984).  
183 Post-cruise HPLC analysis of pigments in 100 – 500 ml seawater samples filtered onto Whatman GF/F  
184 (0.7 µm) filters were conducted at the College of Charleston Grice Marine Laboratory, Charleston, SC on  
185 a Hewlett Packard 1050 system (DiTullio and Geesey, 2002).

186 Seawater samples for nutrient analyses ( $\text{NO}_2^-$ ,  $\text{NO}_3^-$ ,  $\text{NH}_4^+$  and  $\text{PO}_4^{3-}$ ) were collected directly from  
187 Niskin bottles into acid-washed, 30-mL high-density polyethylene (HDP) bottles. After three rinses,

188 bottles were filled to the shoulder, sealed, and frozen ( $-20^{\circ}\text{C}$ ). All frozen samples were transported to  
189 the Oceanic Nutrient Laboratory at USF for analysis using a Technicon Autoanalyzer II.

190

### 191 *2.3 Lipid extraction and analysis of intact polar lipids*

192 Lipids associated with the  $<53\ \mu\text{m}$  SPM on the GFFs were Soxhlet-extracted shortly after the  
193 expedition in 2008 using dichloromethane:methanol (DCM:MeOH; 9:1 v/v) for 8 h. Extracted lipids  
194 were partitioned into DCM against 5% NaCl solution and dried over  $\text{Na}_2\text{SO}_4$ . Total lipid extracts (TLEs)  
195 were stored at  $-20^{\circ}\text{C}$ . More recent IPL analyses typically utilize less harsh modified Bligh-Dyer  
196 extraction procedures, however, we believe that our finding labile IPLs, such as hexose-phosphate-hexose  
197 GDGTs, indicates that our results are not compromised (cf. Lengger et al., 2012).

198 IPL analyses by high-performance liquid chromatography-mass spectrometry (HPLC-MS) were  
199 carried out initially in 2010/2011 and again in 2015 as instrument protocols improved. In between these  
200 analyses we did not observe a notable selective loss of IPL compounds, instead we were able to detect a  
201 much larger suite of IPL structures due to improved detection and chromatographic separation techniques  
202 (Wörmer et al., 2013). The confidence in these results are supported by the analysis of IPL standards  
203 (Suppl. Table 2) that are stored at  $-20^{\circ}\text{C}$  over several years (fresh standard mixtures are typically prepared  
204 every 2 to 3 years), which do not indicate degradation of any particular IPL over time. The analysis in  
205 2010/2011 focused on absolute concentrations of the major IPLs (for distinction between major and minor  
206 IPLs see results section). Aliquots of the TLE were dissolved in DCM/methanol (5:1 v/v) for injection  
207 on a ThermoFinnigan Surveyor HPLC system coupled to a ThermoFinnigan LCQ DecaXP Plus ion-trap  
208 MS via electrospray interface (HPLC-ESI-IT-MS<sup>n</sup>) using conditions described previously (Sturt et al.,

209 2004; Xie et al., 2014). Ten  $\mu\text{L}$  of a known TLE aliquot spiked with  $\text{C}_{19}$ -PC as internal standard was  
210 injected onto a LiChrosphere Diol-100 column ( $150 \times 2.1$  mm,  $5 \mu\text{m}$ , Alltech, Germany) equipped with a  
211 guard column of the same packing material. Absolute IPL concentrations were determined in positive  
212 ionization mode with automated data-dependent fragmentation of the two most abundant base peak ions.  
213 Acyl moieties of glycolipids and aminolipids were identified via HPLC-IT-ESI-MS<sup>2</sup> experiments in  
214 positive ionization mode, whereas phospholipid side chain composition was analyzed in negative  
215 ionization mode. Details of mass spectral interpretation, and identification of fatty acid moieties are  
216 described in Sturt et al. (2004) and Schubotz et al. (2009) and are exemplified in Suppl. Table 3. HPLC-  
217 MS analysis is not able to differentiate between double bonds or rings, therefore in the subsequent text we  
218 will refer to double bond equivalents (DBE) to include both possibilities, similarly absolute chain length  
219 cannot be determined as branched and straight chain alkyl chains cannot be differentiated, therefore we  
220 report total carbon atom numbers for the alkyl side chains. Assignment of the betaine lipid DGTS was  
221 according to the retention time of the commercially available standard DGTS (Avanti Polar Lipids, USA).  
222 The isomer DGTA, which elutes at a different retention time due to its structural difference (e.g., Brandsma  
223 et al., 2012) was not observed in the HPLC-MS chromatograms. For all analyses, response factors of  
224 individual IPLs relative to the injection standard  $\text{C}_{19}$ -PC were determined using dilution series of  
225 commercially available standards (Suppl. Table 2).

226 Subsequent analyses in 2015 were used to obtain sum formulas and IPL structures based on exact  
227 masses in the MS1 and MS-MS experiments and to additionally provide data on minor lipids, which were  
228 below detection limit during the 2010/2011 ion trap analyses (for distinction between major and minor  
229 lipids see results section). For these measurements absolute quantities could not be determined since the

230 TLE had been used for other experiments and the information on TLE amounts used was unknown;  
231 therefore, these analyses are used to describe relative abundances. Analyses were performed on a Bruker  
232 maXis Plus ultra-high resolution quadrupole time-of-flight mass spectrometer (Q-TOF) with an ESI  
233 source coupled to a Dionex Ultimate 3000RS UHPLC. Separation of IPLs was achieved using a Waters  
234 Acquity UPLC BEH Amide column as described in Wörmer et al. (2013), which resulted in better  
235 chromatographic separation of compounds and higher sensitivity compared to the 2010/2011 analyses.  
236 Relative proportions of compounds were quantified taking the different response factors of IPL classes  
237 into account. Peak areas in extracted mass chromatograms were corrected with absolute response factors  
238 determined in dilution series of commercially available standards (Suppl. Table 2). Some ions assigned  
239 to either PE-AEG and PC-AEG could not be quantified individually due to co-elution of these compounds  
240 and were thus quantified as one group using the mean response factor of PE- and PC-DAG. For  
241 compound classes for which no standards were available, (e.g., PI-DAG, OL and the unknown aminolipids  
242 AL-I and AL-II) the relative responses could not be corrected for. Assuming these compounds may  
243 ionize similarly as structurally related IPLs, values may be off by a factor of 0.2 to 1.4, which is the  
244 maximum range of response factors observed for the standards.

245

#### 246 *2.4 Statistical analysis*

247 Nonmetric multidimensional scaling (NMDS) analysis was used to illustrate the relationships  
248 among objects hidden in a complex data matrix (Rabinowitz, 1975) and was performed in the free software  
249 R (version 3.4.3, [www.r-project.org/](http://www.r-project.org/)) with *metaMDS* (vegan library, version 2.4-6) as described by  
250 Wakeham et al. (2012). The datasets of relative lipid distribution and variations in carbon number and

251 double bond equivalents were standardized by Hellinger transformation using the function *decostand*,  
252 while for all other variables (environmental parameters, microbial groups) absolute numbers were used.  
253 The compositional dissimilarity was calculated by Euclidean distance measure. The resulting plot shows  
254 the distribution of lipids and sampling depths. Microbial groups and geochemical parameters were  
255 overlaid by function *envfit*. Lower stress is related to high quality of solution, and stress values  $\leq 0.1$   
256 indicate results of good quality (Rabinowitz, 1975). Non-parametric Spearman Rank Order Correlation  
257 analysis was performed on combined data of environmental variables and IPL ratios and IPL relative  
258 abundances of all four stations using SigmaPlot 11.0 (Systat Software Inc., San Jose, USA).

259

### 260 **3. Results**

#### 261 *3.1 Biogeochemical setting*

262 All along the transect, the thin mixed layer (upper ~20 m) was warm, ~25–28 °C, with oxygen  
263 concentrations approaching air saturation at ~200  $\mu\text{M}$  (Fig. 2). The thermocline was abrupt at ~20–50 m,  
264 where temperatures dropped to ~15–18 °C and oxygen decreased to ~20  $\mu\text{M}$ . Temperatures stabilized  
265 by ~250–300 m depth at ~10–12 °C and oxygen levels were  $<2 \mu\text{M}$ ; especially at Station 8 there were  
266 spatially and temporally variable oxygen intrusions into the upper portion of the OMZ. By ~600–800 m  
267 depth, a deep oxycline was observed where oxygen concentrations began to rise again to ~40  $\mu\text{M}$  at  
268 temperatures of ~4 °C by 1250 m. For the purposes of this discussion, the water column of the ETNP  
269 was partitioned into four horizons based on oxygen content: an oxic epipelagic zone down to the  
270 thermocline (0–50 m;  $200 \mu\text{M} > \text{O}_2 > 20 \mu\text{M}$ ); an upper OMZ (Station 1 and 8: 50–300 m, Station 5: 50  
271 – 350 m, Station 2: 50–200 m;  $20 \mu\text{M} > \text{O}_2 > 2 \mu\text{M}$ ); the core OMZ (Station 1 and 8: 300–800 m, Station

272 5: 350 – 600 m Station 2: 200 – 600 m;  $O_2 < 2 \mu\text{M}$ ); and a deep oxycline (Station 1 and 8  $\geq 800$  m, Station  
273 2 and 5  $\geq 600$  m;  $O_2 > 2 \mu\text{M}$ ) of rising  $O_2$  levels (Fig. 1a). Note that sampling at stations 1 and 8 reached  
274 to 1250 m depth so SPM from  $>750$  m depth best represents the core OMZ and deep oxycline.

275 Chl- $\alpha$  was highest in surface waters with maximum values of  $1.8 \mu\text{g/L}$  at 10 m at station 5, was  
276 between  $0.2$  and  $0.7 \mu\text{g/L}$  at station 1, 2 and 8 and decreased to values close to zero below 100 m at all  
277 stations (Fig. 2; see also Fiedler and Talley, 2006, and Pennington et al., 2006, for additional results from  
278 previous surveys). HPLC analysis of accessory pigments (Goericke et al., 2000; Ma et al., 2009) showed  
279 that picoplankton, primarily *Prochlorococcus* (indicated by divinyl chlorophyll  $\alpha$ ), were an important  
280 component of the photoautotrophic community, along with diatoms (fucoxanthin), especially *Rhizosolenia*  
281 at the deep fluorescence maximum at stations 1 and 5 but *Chaetoceros* at station 8, and prymnesiophytes  
282 (19'-hexanoyloxyfucoxanthin and 19'-butanoyloxyfucoxanthin; DiTullio and Geesey, 2002; Suppl. Table  
283 4). High phaeopigment abundances (up to 90% of [Chl- $\alpha$  + phaeopigments]) attested to algal senescence  
284 or grazing by macro- (Wishner et al., 2013; Williams et al. 2014) and micro-zooplankton (Olson and Daly,  
285 2013) above and into the oxycline. Primary maxima in transmissivity corresponded with the peak Chl-  
286  $\alpha$  concentrations and fluorescence maxima, but secondary transmissivity maxima between 300 and 400 m  
287 at stations 1, 5, and 8 indicated elevated particle abundances in the core of the OMZ (Fig. 2).

288 Nitrite ( $\text{NO}_2^-$ ) maxima in the OMZ at all stations coincided with nitrate ( $\text{NO}_3^{2-}$ ) deficits (Fig. 3).  
289 Ammonium ( $\text{NH}_4^+$ ) concentrations changed little through the water column (Fig. 3). Phosphate ( $\text{PO}_4^{3-}$ ;  
290 Fig. 3) and total dissolved nitrogen (TDN; not shown) were low (respectively,  $< 0.5$  and  $< 3 \mu\text{M}$ ) in the  
291 upper 20 m of the oxic zone, but increased in the OMZ. High  $\text{PO}_4^{3-}$  (up to  $3.4 \mu\text{M}$ ) and high TDN (up  
292 to  $44.5 \mu\text{M}$ ) were observed in the deep OMZ at stations 2, 5 and 8 (Fig. 3). N:P ratios were lower than

293 the Redfield ratio (16) at all sites and depths (Fig. 3); N:P minima were lowest in surface waters (2.6 to  
294 10 in the upper 20 m) and at ~500 m within the core OMZ and the deep oxycline at station 1 (<9).

295 POC and TN concentrations (< 53  $\mu\text{m}$  material) were highest in the euphotic zone (POC: 20 – 100  
296  $\mu\text{g/L}$ ; TN: 4 – 15  $\mu\text{g/L}$ ), rapidly dropping to 5  $\mu\text{g/L}$  and 1  $\mu\text{g/L}$  below the upper OMZ, respectively (Fig.  
297 2; Suppl. Fig. 1). Secondary maxima for POC (~10  $\mu\text{g/L}$ ) and TN (~2  $\mu\text{g/L}$ ) within the core of the OMZ  
298 might reflect elevated microbial biomass there. Concentrations dropped in the deep oxycline to  $\leq 3$   $\mu\text{g/L}$   
299 and  $\leq 0.5$   $\mu\text{g/L}$  for POC and TN, respectively.

300 Absolute IPL concentrations were determined by ion trap LCMS and varied between 250 and 1500  
301 ng/L in the oxic zone and abruptly decreased more than 10-fold (to <20 ng/L) in the upper OMZ (Fig. 2).  
302 Secondary maxima in IPL concentrations (15–40 ng/L) within the OMZ at all stations roughly coincided  
303 with elevated numbers of prokaryotes (Fig. 2). IPL:POC ratios decreased with increasing depth (Fig. 2),  
304 tracking trends of POC, TN and IPL concentrations.

305

### 306 *3.2 Changes in IPL composition with water column depth in the ETNP*

307 In total, 24 IPL classes were identified in the ETNP (Fig. 4, Suppl. Fig. 2). Eleven major and thirteen  
308 minor IPL classes were detected in the QTOF analyses, which were classified according to their relative  
309 abundance: if an individual IPL comprised more than 10% of total IPLs at any depth of the four stations  
310 it was classified as a major IPL, compounds <10% were minor IPLs. Based on their head group  
311 composition IPLs were grouped into glycolipids, phospholipids or aminolipids. Figure 3 shows changes  
312 in the relative abundances (as percentages of total IPLs, excluding isoprenoidal archaeal IPLs) of  
313 glycolipids, phospholipids and aminolipids as well as several substitute lipid ratios, reflecting preferential



314 biosynthesis of non-phosphorus lipids to replace phospholipids under phosphate-limiting growth (cf. Van  
315 Mooy et al., 2006; Popendorf, et al., 2011b; Carini et al., 2015; Bosak et al., 2016). Relative abundances  
316 of non-isoprenoidal phospholipids were highest in the core OMZ between 400 and 600 m at all sites,  
317 where they comprise up to 45–76% at stations 1, 2 and 5 and between 12 and 61% at station 8.  
318 Phospholipid abundances were lower within the upper OMZ and oxic zone at all stations (between 4 and  
319 55%) and in the deep oxycline at station 8 (<1%). Aminolipid content was highest in SPM from the  
320 upper 55 m at station 5 and 8 (10 to 25%), the core OMZ at station 8 (15 to 34%) and the deep oxycline  
321 at station 1 (17%). Lower aminolipid contents (2 to 11%) were observed in the oxic zone and the core  
322 OMZ at stations 1 and 2, the upper OMZ at station 5 (0 to 11%) and the deep oxycline at station 8 (<2%).  
323 Glycolipid abundance was >9% at all depths, with highest abundance (average 54%, max. 82%) within  
324 the upper OMZ and oxic zone at all stations and the deep oxycline at station 8. Values down to 9% were  
325 observed within the core OMZ.

### 326 3.2.1 Major lipids

327 The eleven major IPL classes included three IP-GDTs of archaeal origin: (1G-GDGT, 2G-GDGT and  
328 HPH-GDGT); and eight IPLs assigned to either a bacterial or eukaryotic origin: three glycolipids (1G-  
329 DAG, 2G-DAG, SQ-DAG), four phospholipids (PG-DAG, PE-DAG, PC-DAG, PE+PC-AEG) and one  
330 aminolipid (DGTS). All major lipid classes were found at almost all depths at all four stations, but with  
331 varying relative abundances (as % of total IPL; Fig. 4, Suppl. Table 1).

332 *Archaeal IP-GDGTs*: Relative abundances of archaeal IPL (IP-GDGTs) generally increased with  
333 depth from non-detectable in surface waters to >50% of total IPLs at station 8 (bottom of core OMZ and  
334 deep oxycline). Archaeal IP-GDGT abundances at stations 1 and 2 peaked at 30% (bottom of upper

335 OMZ, core OMZ and deep oxycline) but were generally <10% at station 5 (Fig. 4). At station 1 and 2,  
336 1G-GDGT and 2G-GDGT were most abundant with variable amounts of HPH-GDGTs, whereas 1G-  
337 GDGT and HPH-GDGT dominated archaeal IPLs at station 5 and 8 at most depths. Distributions of  
338 glycosidic IPL-GDGTs obtained in the present investigation corroborate the absolute values reported by  
339 (Xie et al., 2014) for stations 1 and 8: 1G-GDGT was more abundant than 2G-GDGT at station 8 when  
340 compared to station 1. The core GDGTs of 1G-GDGTs and HPH-GDGTs are dominated by GDGT-0  
341 and crenarchaeol (Suppl. Fig. 3), whereas 2G-GDGTs are dominated by GDGT-2 and a small amount of  
342 crenarchaeol (Zhu et al., 2016)

343 *Diacylglycerol lipids:* The oxic zone and the upper OMZ were dominated (~50–80% of IPL) at all  
344 sites by the diacylglycerol glycolipids, 1G-DAG, 2G-DAG and SQ-DAG (Fig. 4). In the core OMZ and  
345 deep oxycline, relative amounts of 2G-DAG and SQ-DAG decreased to 4% and 12%, respectively. 1G-  
346 DAG abundances were lowest in the core OMZ at all stations, but were up to 47% of total IPL in the deep  
347 oxycline. Diacylglycerol phospholipids, PE-, PG- and PC-DAG, were the second most abundant IPLs.  
348 Abundances of PE- and PG-DAG were highest within the upper and core OMZ, constituting >50% in the  
349 core OMZ at station 1, >30% at stations 2 and 5, and 16% at station 8. PC-DAG, with average  
350 abundances of 5% at stations 1, 2, 8 and 3% at station 5, did not exhibit depth-related trends. The third  
351 most abundant diacylglycerol class was the betaine lipid DGTS, which was present throughout the water  
352 column at average abundances of 7% at station 1, 2 and 8, and 5% at station 5.

353 Major diacylglycerol lipids showed changes in average number of carbon atoms and double bond  
354 equivalents (DBE) with depth (Fig. 5, Suppl. Table 5). The glycolipids and PC-DAG decreased in average  
355 carbon number by up to three carbons and decreased in DBE by up to 2 at the top of the upper OMZ and

356 within the core OMZ compared to the oxic zone and the deep oxycline. Average carbon numbers for  
357 PE- and PG-DAG and DGTS showed an inverse trend, both generally increasing up to two carbons  
358 between the upper OMZ and the core OMZ. Changes in DBE were not as pronounced for PG-DAG and  
359 DGTS, on average 1 to 2 DBE greater in surface waters than in deeper waters, while the number of DBE  
360 increased on average with depth for PE-DAG.

361 *Acyl-ether glycerol lipids:* Mixed ether-ester glycerol core structures with either PE or PC head  
362 groups were observed at all stations and all depths (generally 4-12%) except for the deep oxycline at  
363 station 8.

364

### 365 3.2.2 Minor lipids

366 Thirteen minor IPL classes were identified, five of which were glycolipids, four phospholipids and  
367 four aminolipids. All minor lipid classes were detected at each site except for OH-DGTS which was  
368 absent at station 1. Some minor lipids were found at all depths, whereas others were restricted to specific  
369 depth zones as defined by oxygen content (Fig. 4).

370 *Diacylglycerol lipids:* Two minor diacylglycerol glycolipids, 1G-OH-DAG and 3G-DAG, were  
371 most abundant within the oxic zone and the upper OMZ, comprising between 2 to 15% of minor lipids on  
372 average (0.1 to 0.6% of total IPLs), but were only sporadically found within the core OMZ and deep  
373 oxycline. 1G-OH-DAG showed highest relative abundances at station 5, constituting up to 40% of minor  
374 lipids. Four additional phospholipids with diacylglycerol core structures with the following head groups  
375 were identified: diphosphatidylglycerol (DPG), phosphatidyl-(*N*)-methylethanolamine (PME),  
376 phosphatidyl-(*N,N*)-dimethylethanolamine (PDME) and phosphatidyl inositol (PI). DPG, PME-DAG and

377 PDME-DAG had highest relative abundances (respectively 65, 56 and 35% of minor IPL) within the upper  
378 and core OMZ, but at lower abundances within the oxic zone at all stations and in the deep oxycline at  
379 stations 1, 2 and 5. PI-DAG was most abundant in the oxic zone and the upper OMZ (up to 25% of  
380 minor IPL), but was also present in the core OMZ and the deep oxycline, except for station 8. Three  
381 types of aminolipids were observed as minor lipids. OH-DGTS with up to three hydroxyl-groups  
382 attached to the fatty acyl side chains (Suppl. Fig. 4) was observed at most depths at station 8 with an  
383 average relative abundance of 23% among the minor lipids; it was also occasionally detected at stations 2  
384 and 5 within the oxic zone and upper OMZ. Two additional aminolipids had an undefined head group  
385 that exhibited fragmentation patterns characteristic of betaine lipids, but without established betaine head  
386 group fragments (Suppl. Fig. 5b, c). The tentatively assigned sum formula for the head group of the first  
387 unknown aminolipid (AL-I) at ca. 6.7 minutes LC retention time was  $C_8H_{17}NO_3$  and for the second  
388 unknown aminolipid (AL-II) at 10.5 minutes was  $C_7H_{15}NO_3$ . The head group sum formula for AL-II  
389 matches that of DGCC, but the diagnostic head group fragment of  $m/z$  252 was not detected, and  
390 furthermore, AL-II did not elute at the expected earlier retention time for DGCC. AL-I and AL-II were  
391 detected at most depths at all four stations, with average abundances of 1 to 6% of the minor lipids for  
392 AL-I and comparably higher relative abundances ranging from 16 to 36% for AL-II.

393 *Acyl-ether glycerol lipid:* One minor compound that eluted slightly earlier than SQ-DAG had a  
394 fragmentation pattern similar to SQ-DAG but with exact masses of the parent ion and MS-MS fragments  
395 in both positive and negative ion mode that suggested a mixed acyl-ether glycerol core lipid structure  
396 (Suppl. Fig. 5d, e). Tentatively assigned as SQ-AEG, this IPL was observed at most depths at all four  
397 stations with highest relative abundances of 5 to 60% of minor IPLs within the oxic zone.

398 *Sphingolipids*: Two types of sphingolipids were identified, monoglycosyl ceramide (1G-CER), and  
399 hydroxylated monoglycosyl ceramide (1G-OH-CER) with up to two hydroxyl groups attached to the  
400 hydrophobic side chains (Suppl Fig. 3e). Both were observed at all depths at stations 1, 2, and 5 at  
401 average relative abundances between 3 and 8% of minor IPLs, but neither was detected in the deeper part  
402 of the core OMZ or deep oxycline at station 8.

403 *Ornithine lipids*: Trace amounts (<4%) of ornithine lipids were detected in the core OMZ of stations  
404 2 and 5.

405

### 406 *3.2.3 Statistical relationships between environmental parameters and lipid distribution*

407 Spearman Rank Order Correlation was used to evaluate relationships between relative lipid  
408 abundance of lipid classes and environmental parameters (Table 1). The glycolipids 2G- and SQ-DAG  
409 showed highly significant ( $p < 0.001$ ) and positive correlations with depth, fluorescence, POC, TN,  
410 temperature and Chl- $\alpha$ , significant positive correlations were also observed with oxygen. Both also  
411 showed highly significant but negative correlations with phosphate and nitrate, and these overall trends  
412 were mirrored in the SQ-DAG:PG-DAG ratio. Total glycolipids (GL) and 1G-DAG only showed  
413 correlations with a few environmental parameters and total GL were only significantly positively  
414 correlated with oxygen. Most aminolipids and phospholipids did not show significant correlations with  
415 environmental parameters and any other correlations were neither strongly positive nor negative.  
416 Relative abundances of total aminolipids and aminolipid (AL) to phospholipid (PL) ratios correlated  
417 positively with ammonium. AL:PL also correlated positively with oxygen. Relative abundance of total  
418 phospholipids and most individual phospholipids (PG-, PE-, PME-, and PDME-DAG) correlated

419 negatively with oxygen. The only phospholipid that significantly correlated with phosphate was PDME,  
420 however, the positive correlation is not strong ( $r^2 < 0.4$ ).

421 NMDS analysis revealed that all samples from the oxic zone had a negative loading on the NMDS2  
422 axis along with environmental variables such as oxygen, fluorescence, TN, POC and Chl- $\alpha$ . IPLs with  
423 a strong negative loading on the NMDS2 axis ( $< -0.2$ ) were 1G-OH-DAG, SQ-AEG, 2G-DAG, SQ-DAG,  
424 PI-DAG and OH-DGTS. Most samples from the core OMZ and deep oxycline had a positive loading on  
425 the NMDS2 axis, together with depth, phosphate and nitrate. IPLs that showed a strong positive loading  
426 on the NMDS2 axis ( $> 0.2$ ) were PDME-DAG, 2G-GDGT, DPG, PME-DAG and HPH-GDGT. Almost  
427 all environmental variables had low  $p$ -values ( $< 0.001$ ), indicating highly significant fitted vectors with the  
428 exception of temperature, salinity, ammonium and nitrate. Highest goodness of fit statistic was observed  
429 with oxygen ( $r^2 = 0.54$ ), followed by phosphate ( $r^2 = 0.48$ ) and then fluorescence ( $r^2 = 0.46$ ).

430

#### 431 **4. Discussion**

432 The moderate primary productivity in surface waters of the ETNP, intense microbial degradation of  
433 particulate organic matter exported to the thermocline, and restricted midwater oxygen replenishment  
434 produce the strong, shallow (~20 m deep) oxycline and a ~500 m thick OMZ with dissolved oxygen  
435 concentrations of  $< 2 \mu\text{M}$ , not unlike other oceanic OMZs (e.g., Ulloa et al., 2012). The ETNP is  
436 dominated by picoplankton, and micro-grazers reported consuming most phytoplankton production  
437 (Landry et al., 2011; Olsen and Daly, 2013). Peak macrozooplankton biomass was located at the  
438 thermocline, near the upper boundary of the OMZ, but a secondary biomass peak of a different  
439 zooplankton assemblage was present at the deep oxycline once  $\text{O}_2$  concentrations rose to  $\sim 2 \mu\text{M}$  (Wishner

440 et al., 2013). Shallow-water, plankton-derived particulate organic carbon is the primary food source for  
441 zooplankton in the mixed layer, upper oxycline and core OMZ, whereas deep POC, some of which might  
442 have been produced by microbes in the OMZ, is important for deep oxycline zooplankton (Williams et al.,  
443 2014). Microbial community structure and activities are typical of other OMZs (Taylor et al., 2001; Lin  
444 et al., 2006; Woebken et al., 2007; Wakeham et al., 2007; 2012). Cell numbers of total prokaryotes were  
445 highest in the euphotic layer and decreased with depth at the thermocline but rose again within the core  
446 OMZ (Podlaska et al., 2012). Elevated rates of chemoautotrophy, measured by dark dissolved inorganic  
447 carbon (DIC) assimilation, were observed at several depths in the OMZ and in the lower oxycline.  
448 Transfer of chemoautotrophically-fixed carbon into zooplankton food webs is also evident (Williams et  
449 al., 2014). Bacteria dominate the prokaryotic community at all stations. Nitrifying bacteria constituted  
450 3-7% of total DAPI-positive prokaryotes in surface waters; sulfate-reducing bacteria (17 and 34% of total  
451 prokaryotes), planctomycetes (up to 24% of total prokaryotes), and anammox bacteria (<1% of  
452 prokaryotes) in the upper OMZ and deep oxycline might be associated with anoxic microzones within  
453 particle aggregates even at low dissolved oxygen concentrations (Woebken et al., 2007; Carolan et al.,  
454 2015). Archaeal cell abundances peaked at the start of the upper OMZ at all stations (up to 37% of total  
455 prokaryotes at station 2), within the core OMZ at station 2 (up to 54% of total detected cells) and within  
456 the deep oxycline at station 5 and 8 (around 25%; Fig. 2e). Crenarchaeota/thaumarchaeota represented  
457 ~20% of prokaryotes throughout the water column, generally being highest in the lower OMZ and deep  
458 oxycline, and at stations 2 and 5 just above the secondary Chl-*a* maxima at ~75 m. Euryarchaeota were  
459 16-20% of total prokaryotes, especially in waters above the OMZ.

460 Total IPL concentrations that were over 50 times higher in the surface waters than at deeper depths

461 coincided with high Chl- $\alpha$  concentrations, reflecting the importance of phototrophic sources to the IPL  
462 pool above the thermocline. Below the thermocline, IPL concentrations generally track trends in  
463 microbial cell abundances, and elevated IPL concentrations in the upper and core OMZ coincide with  
464 elevated nitrite concentrations. The rapid decrease in IPL concentrations below ~100 m probably results  
465 from a combination of a dearth of potential source organisms and the decomposition of sinking detrital  
466 lipids (Harvey et al., 1986; Matos and Pham-Thi, 2009). IPL concentration decreases below the euphotic  
467 zone are well established (Van Mooy et al., 2006; Schubotz et al., 2009; Van Mooy and Fredricks, 2010;  
468 Popendorf et al., 2011b; Wakeham et al., 2012). We believe that the diverse molecular compositions and  
469 shifts in relative abundances of IPLs with changing geochemistry reflect a complex biological community  
470 structure and their ecophysiological adaptation throughout the water column.

471

#### 472 *4.1 Provenance of IPLs in the ETNP*

473 Variations in IPL distributions and head group and core lipid compositions reflect the oxygen-driven  
474 biogeochemical stratification of the water column. Below we discuss potential sources of and possible  
475 physiological roles for IPLs in the different zones.

476

##### 477 *4.1.1 Oxic zone*

478 The glycosyldiacylglycerides that dominate the IPL composition in oxic surface waters, 1G-DAG,  
479 2G-DAG and SQ-DAG, are major constituents of photosynthetic thylakoid and chloroplast membranes  
480 (Wada and Murata, 1998; Siegenthaler, 1998) and are therefore generally assigned to photosynthetic algae  
481 or cyanobacteria (Van Mooy et al., 2006; Popendorf et al., 2011b). These are also the likely predominant



482 sources in our study, however, notably 1G-DAG may also be synthesized by heterotrophic bacteria  
483 (Popendorf et al., 2011a; Carini et al., 2015; Sebastian et al., 2016). In the oxic zone, 1G- and 2G-DAG  
484 are predominantly comprised of C<sub>16</sub> and C<sub>18</sub> fatty acids with zero to 5 double bond equivalents  
485 polyunsaturated acid (PUFA) combinations such as C<sub>16:4</sub>/C<sub>18:3</sub>, C<sub>16:4</sub>/C<sub>18:4</sub>, C<sub>18:3</sub>/C<sub>16:2</sub>, C<sub>18:4</sub>/C<sub>14:0</sub> and  
486 C<sub>18:5</sub>/C<sub>14:0</sub> (Suppl. Table 5, Fig. 5). These are characteristic of eukaryotic algae (Brett and Müller-  
487 Navarra, 1997; Okuyama et al., 1993), such as diatoms and prymnesiophytes that are the major eukaryotic  
488 phytoplankton in the ETNP. SQ-DAG biosynthesized by cyanobacteria do not contain PUFA, but  
489 instead predominantly contain combinations of C<sub>14:0</sub>, C<sub>16:0</sub>, and C<sub>16:1</sub> fatty acids (e.g., Siegenthaler, 1998),  
490 yielding shorter chain lengths and a lower average number of double bonds (0.5 to 1) than the other  
491 glycolipids as observed at the ETNP (Fig. 5). Betaine lipids (DGTS) in surface waters of the ETNP are  
492 comprised of C<sub>14</sub>, C<sub>16</sub>, C<sub>18</sub> and C<sub>20</sub> with multiple unsaturations or rings (on average 1.5 to 3 double bond  
493 equivalents) and are also likely phytoplankton derived (Dembitsky, 1996; Popendorf et al., 2011a).

494 PC-DAG with fatty acyl combinations of C<sub>22:6</sub> and C<sub>20:5</sub> long-chain PUFA and C<sub>16:0</sub> fatty acids (Suppl.  
495 Table 5) in surface waters also point to primarily eukaryotic algal sources. PG-DAG is the only  
496 phospholipid in cyanobacteria and thylakoid membranes of eukaryotic phototrophs (Wada and Murata,  
497 1998). Heterotrophic bacteria are an additional source for PG-DAG since it can be a major phospholipid  
498 in bacterial membranes (Goldfine, 1984). PE-DAG is a minor phospholipid in eukaryotic algae (e.g.,  
499 Dembitsky et al., 1996) but is common in membranes of bacteria (Oliver and Colwell, 1973; Goldfine,  
500 1984) and is biosynthesized by heterotrophic marine bacteria (Popendorf et al., 2011a). Lower average  
501 number of double bond equivalents in PG- and PE-DAG (<2) in the upper water column of the ETNP are  
502 consistent with a bacterial origin (Fig. 5).

503 Oxidic ETNP waters contain PE- and PC-based phospholipids with mixed acyl and ether core lipids  
504 (AEG), which are often referred to as 1-*O*-monoalkyl glycerol ethers (MAGE) if detected as core lipids.  
505 PE-AEG have been described in some sulfate-reducing bacteria (Rütters et al., 2001), which in the oxidic  
506 zone or OMZ of the ETNP would require anoxic microzones in fecal pellets or aggregates (e.g., Bianchi  
507 et al., 1992; Shanks and Reeder, 1993). In the ETNP, MAGE-based phospholipids were 1 to 30% of  
508 total IPLs. MAGE, detected as core lipids in surface waters of the Southern Ocean and eastern South  
509 Atlantic are thought to be breakdown products of IP-AEGs of aerobic bacterial origin (Hernandez-Sanchez  
510 et al., 2014), but culturing experiments have yet to confirm this conclusion. Similarly, aerobic bacteria  
511 (possibly cyanobacteria) are likely sources for SQ-AEG, since sulfoquinovosyl is a diagnostic headgroup  
512 found in cyanobacteria, although, again, these lipids have not been reported in cultured cyanobacteria.  
513 Other minor phospholipids in the euphotic zone include PI-DAG and DPG. They are minor components  
514 in several marine algae (Dembitsky, 1996) and bacteria (Morita et al., 2010; Diervo et al., 1975;  
515 Mileykovskaya and Dowhan, 2009). Bacteria may also be the source of the low detected levels of *N*-  
516 methylated phospholipids PME-DAG and PDME-DAG (Goldfine and Ellis, 1964). 3G-DAG comprised  
517 of C<sub>14</sub>, C<sub>16</sub> and C<sub>18</sub> fatty acids with up to six double bond equivalents is another minor IPL detected in the  
518 euphotic zone at all stations except for station 5. It has been found in some plants (Hölzl and Dörmann,  
519 2007) and some anaerobic gram-positive bacteria (Exterkate and Veerkamp, 1969), which could both be  
520 probable sources in the oxidic euphotic zone of the ETNP.

521 The sphingolipid, 1G-CER, consists of a sphingosine backbone linked to a fatty acid via an amide  
522 bond and was a minor component in the oxidic zone (<5% of IPL) at all stations (Fig. 4). Glycosidic  
523 ceramides occur in eukaryotic algae such as the coccolithophore *Emiliana huxleyi* (Vardi et al., 2009).

524 We also detected 1G-OH-CER with up to 2 hydroxylations in the core lipid structure (Suppl. Fig. 4).  
525 Multiple-hydroxylated sphingoid bases are potential markers of viral infection and cell death in at least  
526 some marine phytoplankton, notably *E. huxleyi* (Vardi et al., 2009). We did not, however, find mass  
527 spectral evidence for the presence of viral polyhydroxylated 1G-CER, as described by Vardi et al. (2009)  
528 and therefore rather suggest that eukaryotic algal cells are potential sources for the 1G-CER (Lynch and  
529 Dunn et al., 2004) in surface waters of the ETNP. We also detected hydroxylated glycolipids (1G-OH-  
530 DAG) and aminolipids (OH-DGTS) with up to two hydroxyl-groups or one hydroxyl group combined  
531 with an epoxy or keto function attached to the acyl groups (Suppl. Fig. 4). The addition of hydroxyl  
532 groups or general oxidation of fatty acids in plants, algae and yeast is a defense mechanism and response  
533 to oxidative stress (Kato et al., 1984; Andreou et al., 2009). Hydroxy fatty acids, for example, are  
534 intermediates in oxidative degradation of fatty acids (Lehninger, 1970), and since they are constituents of  
535 structural biopolymers of many microorganisms (Ratledge and Wilkinson, 1988), they are present in  
536 marine particulate matter (e.g., Wakeham, 1999), likely derived from membrane constituents of Gram-  
537 negative bacteria, the most abundant bacteria in seawater (Rappé and Giovannoni, 2000).

538

#### 539 *4.1.2 Upper OMZ*

540 Glycolipid abundance varied between 15 to 80% of total IPL within the upper OMZ below the  
541 thermocline/oxycline. SQ-DAG and 2G-DAG exhibited strong decreases in relative and absolute  
542 abundance below 125 m at all stations consistent with the decrease in their phototrophic biomass.  
543 Number of carbon atoms in the core lipid chains and number of double bond equivalents of glycolipids  
544 showed considerable variations within the upper OMZ (Fig. 5), indicating a different assemblage of source

545 organisms compared to the oxic zone. Likewise, decreasing carbon numbers and double bond  
546 equivalents for PC-DAG and DGTS combined with a dominance by C<sub>14</sub>, C<sub>16</sub> and C<sub>18</sub> saturated and  
547 monounsaturated fatty acids (Suppl. Table 5) supports a shift from eukaryotic to bacterial sources. This  
548 suggests the diverse proteobacteria in the upper OMZ may biosynthesize non-phosphorus substitute IPLs.  
549 1G-DAG or DGTS are known to replace phospholipids, primarily PE-DAG and PC-DAG under  
550 phosphorus limited growth (Geske et al., 2012; Carini et al., 2015; Sebastian et al., 2016; Yao et al., 2015),  
551 including at the phosphate concentrations of 2 to 2.5  $\mu$ M in the upper OMZ. Sulfate-reducing  
552 proteobacteria, which comprise up to 10% of the total bacteria in the ETNP (Podlaska et al., 2012) may  
553 be candidate organisms for this phospholipid to glycolipid replacement (Bosak et al., 2016). Structures  
554 of minor IPLs, AL-I and AL-II were not fully elucidated (see Suppl. Fig. 5) and their origins remain  
555 uncertain. PME- and PDME-DAG, DPG, 1G-CER and 1G-OH-CER within the upper OMZ are  
556 consistent with previous reports of their production by (unidentified) bacteria near redox boundaries in  
557 other stratified water bodies (Schubotz et al., 2009; Wakeham et al., 2012).

558 Archaeal IPLs with glycosidic headgroups and tetraether core structures (1G- and 2G-GDGT)  
559 comprised a greater proportion of the overall IPL pool within the upper OMZ than in surface waters.  
560 Analysis of these same samples by Xie et al. (2014) first reported that concentrations of glycosidic GDGTs  
561 peak in the ETNP roughly at depths where nitrite maxima are observed. IP-GDGTs with the hexose-  
562 phosphate-hexose (HPH) headgroups and the core GDGT crenarchaeol (Suppl. Fig. 3) of thaumarchaeota  
563 (Schouten et al., 2008; Elling et al., 2017) were most abundant at depths of nitrate maxima at all ETNP  
564 stations, as they are in other oxygen-deficient water columns (e.g., Pitcher et al., 2011; Lengger et al.,  
565 2012; Schouten et al., 2012; Sollai et al., 2015), although they were present at greater depths in the ENTNP

566 as well. The microbial enumerations by Podlaska et al. (2012) had shown previously that  
567 thaumarchaeota (referred to as crenarchaeota) and euryarchaeota constitute almost equal amounts to <10%  
568 of total cell number in the upper OMZ of the ETNP. Therefore, we conclude that uncultured marine  
569 Group II euryarchaeota, are also potential sources for glycosidic GDGTs as has been suggested previously  
570 (Lincoln et al., 2014; Zhu et al., 2016).

571

#### 572 4.1.3 Core OMZ and deep oxycline

573 IPL distributions in the core OMZ and at the deep oxycline of the ETNP that were notably different  
574 from the oxic zone and the upper OMZ are consistent with *in-situ* microbial origins. Phospholipid  
575 abundance at all stations generally increased to over 50% (except for station 8) at the expense of  
576 glycolipids. PE and PG-DAG are the most abundant phospholipids in the core OMZ, along with PC-  
577 DAG and PE- and PC-AEG, DPG. PME and PDME-DAG are all common lipids in  $\alpha$ -,  $\gamma$ - and some  $\beta$ -  
578 proteobacteria (Oliver and Colwell, 1973; Goldfine, 1984) that are present in the OMZ (Podlaska et al.,  
579 2012). Changes in phospholipids chain length and number of double bond equivalents further support  
580 *in-situ* IPL production (Fig. 5). Fatty acid combinations for phospholipids were dominated by saturated  
581 C<sub>14:0</sub>, C<sub>15:0</sub> and C<sub>16:0</sub> and monounsaturated C<sub>16:0</sub> C<sub>17</sub> and C<sub>18:0</sub> (Suppl. Table 5); PUFA were generally of  
582 reduced abundance, and odd-numbered fatty acids increased in proportion. In the case of PUFA, even  
583 though they may be biosynthesized by piezophilic aerobic deep-sea bacteria (DeLong and Yayanos, 1986,  
584 Fang et al. 2003; Valentine and Valentine, 2004), either the microaerophilic bacteria in the deep OMZ of  
585 the ETNP do not produce PUFA or these labile fatty acids are rapidly degraded *in-situ* (DeBaar et al., 1983;  
586 Prahl et al., 1984; Neal et al., 1986).

587 Among glycolipids, 1G-DAG was most abundant at the deep OMZ/oxycline at stations 1 and 8; here  
588 1G-DAG abundance actually increases over that of shallower depths. Carbon number and number of  
589 double bond equivalents for glycolipids are again distinct from the surface waters, with on average 1 to 2  
590 carbon atoms shorter chain lengths and 1 to 3 fewer double bonds (Fig. 5), supporting the notion that at  
591 least some of these glycolipids are biosynthesized *in-situ* and not simply exported from the surface waters.  
592 In particular, SQ-DAG in the core OMZ/oxycline contained odd-carbon numbered fatty acids (e.g.,  
593 C<sub>15:0</sub>/C<sub>16:0</sub> and C<sub>14:0</sub>/C<sub>15:0</sub>) different from the cyanobacterial SQ-DAG in surface waters (Suppl. Table 5).  
594 Some Gram-positive bacillus and firmicutes biosynthesize 1G, 2G- and SQ-DAG (Hölzl and Dörmann,  
595 2007) and 1G-, 2G- and SQ-DAG in deeply buried Wadden Sea sediments are attributed to anaerobic  
596 bacteria (Seidel et al., 2012). However, Gram-positive bacteria are generally not abundant in seawater.

597 The core OMZ/deep oxycline are particularly enriched in archaeal GDGT, notably 1G-GDGT and  
598 HPH-GDGT, with predominantly GDGT-0 and crenarchaeol as core lipids (Suppl. Fig. 3). At stations 1  
599 and 8 where sampling penetrated below ~800 m depth, 1G-GDGT and HPH-GDGT constitute up to ~60%  
600 and ~22%, respectively, of total IPL. Significantly, the elevated abundances of 1G-GDGT and HPH-  
601 GDGT at the bottoms of the sampling depth profiles in the deep oxycline of stations 1 and 8 correspond  
602 to depths at which ammonium concentrations are higher than shallower in the core OMZ (Fig. 2).  
603 Remineralization at the deep-oxycline might provide additional ammonium to drive thaumarchaeotal  
604 ammonium oxidation and production of archaeal IPLs.

605

## 606 *4.2 Factors influencing IPL distribution in the ENTP*

### 607 *4.2.1 Factors affecting structural diversity of the core lipid composition*

608 IPL in the ETNP display considerable diversity not only in the headgroup but also core lipid types,  
609 from diacylglycerol lipids with varying number of carbon atoms (likely chain lengths) and zero to multiple  
610 double bond equivalents (likely reflecting the number of unsaturations), with or without hydroxylations  
611 to mixed ether/ester glycerolipids, sphingolipids and ornithine lipids. Statistical analysis provides aids  
612 in illuminating influences of environmental factors and microbial community structure on the lipid  
613 composition in the water column of the ETNP. Changes in core alkyl lipid chain length and degree of  
614 unsaturation are often associated with temperature (Neidleman, 1987), even at the range of temperatures  
615 of the ETNP water column. However, NMDS analysis did not yield any strong correlations between  
616 temperature and number of carbon atoms in the side chains or double bond equivalents of the major IPL  
617 classes ( $r^2 < 0.02$ , Suppl. Table 6), nor with other environmental parameters ( $r^2 < 0.3$ , Suppl. Table 6).  
618 Instead, changing biological sources may play a decisive role in determining number of carbon atoms and  
619 double bond equivalents in the ETNP. For instance, long-chain PUFAs in surface waters are mainly  
620 synthesized by phytoplankton, while in deeper waters some bacteria may biosynthesize these PUFAs.  
621 The degree of hydroxylation in the acyl side chains also did not show any clear link to specific  
622 environmental factors, although, both 1G-OH-CER and OH-DGTS had negative loadings on the NMDS-  
623 2 axis indicating a higher abundance of these compounds in oxic samples. It is possible that hydroxylated  
624 IPLs play a role during oxidative stress and/or are involved in other defense mechanisms (Kato et al.,  
625 1984; Andreou et al., 2009).

626 Mixed ether-acyl lipids have been reported in various oceanic settings (Hernandez-Sanchez et al.,  
627 2014). In our study, there was no noticeable correlation between PE- and PC-AEG and depth or oxygen  
628 concentrations (Fig. 6). Ornithine lipids were strongly negatively loaded on the NMDS-1 axis, but none

629 of the measured environmental parameters could account for this negative loading (Fig. 6). Therefore,  
630 it remains unclear what factor(s) ultimately determine their distribution. Likewise, there were no  
631 significant correlations between the sphingolipid 1G-CER and any environmental parameter. Since  
632 ether-acyl lipids, ornithine lipids and sphingolipids play many functional roles in biological systems, their  
633 variable distribution within the water column reflect most likely the diversity of microbes inhabiting the  
634 dynamic oxygen regime of the ETNP.

635

#### 636 *4.2.2 Factors influencing head group composition*

637 NMDS analysis of normalized IPL composition and quantitative microbial data (abundance of  $\alpha$ ,  $\beta$ ,  
638  $\gamma$ ,  $\epsilon$ -proteobacteria, sulfate-reducing bacteria  $\delta$ -proteobacteria, planctomycetes, crenarchaeota including  
639 thaumarchaeota and euryarchaeota) did not yield any high goodness of fit statistic ( $r^2 < 0.3$ ; Suppl. Table  
640 6) that would clearly delineate specific prokaryotic sources for the various IPL. This absence of  
641 statistical correlation would result if neither the IPL compositions of SPM nor the structure and lipid  
642 composition of the prokaryotic community were sufficiently unique to strongly distinguish the  
643 biogeochemical zones. Indeed, although there are depth-related differences in IPL composition of SPM  
644 and prokaryotic community, there is considerable overlap. Therefore, instead of trying to elucidate  
645 specific IPL sources, we here query the affect environmental factors such as temperature, nutrient or  
646 oxygen concentrations may have on the IPL compositions in the ENTP, and by analogy to natural marine  
647 settings in general. Most the major and minor glycolipids were loaded negatively on the NMDS2 axis,  
648 as were oxygen, fluorescence, Chl- $\alpha$ , POC and TN (Fig. 6). A notable exception was 1G-DAG which  
649 had only a slightly negative loading on the NMDS-2 axis. These relationships (loadings) roughly reflect



650 the vertical distribution of IPLs in the water column of the ETNP. Glycolipids, particularly 2G-DAG  
651 and SQ-DAG, were most abundant in the oxic zone characterized by high oxygen concentration and  
652 moderate primary productivity, dominated by phytoplankton, primarily cyanobacteria (high POC, TN and  
653 elevated Chl- $\alpha$  and fluorescence). Spearman Rank Order Correlations confirm these observations,  
654 including the lack of significant correlations between 1G-DAG and depth or any other environmental  
655 parameter. One explanation is that 1G-DAG originates from assorted sources throughout the water  
656 column independent of any single environmental variable. Similarly, PC-DAG, PG-DAG, and DGTS  
657 did not correlate with any of the tested environmental variables, because their compositions are relatively  
658 homogeneous across all biogeochemical zones. PE-, PME- and PDME-DAG, and DPG, on the other  
659 hand, that became more prevalent within the core OMZ, and at deeper depths where oxygen concentrations  
660 decrease and nutrient ( $\text{NO}_3^-$  and  $\text{PO}_4^{3-}$ ) concentrations were elevated due to organic matter  
661 remineralization, gave positive loadings with these environmental parameters on the NDMS2 axis.  
662 Archaeal IPLs showed positive loadings on the NMDS2 axis, consistent with the increasing importance  
663 of archaeal abundance with depth and at reduced oxygen concentrations.

664

#### 665 *4.2.3 Links between substitute lipid ratios and nutrient concentrations*

666 SQ-DAG and PC-DAG are often the most abundant respective glycolipids and phospholipids in the  
667 surface ocean (Popendorf et al., 2011a,b), including the Eastern Tropical South Pacific (Van Mooy and  
668 Fredricks, 2010). The abundance of SQ-DAG in the surface waters of the ETNP (18-50% of total IPL)  
669 is thus not unusual. In the ETNP, however, PC-DAG was comparably minor (3-13% of total IPL).  
670 Instead, DGTS was abundant at some stations, up to ~20% of major IPL at station 5. SQ-DAG and

671 DGTS serve similar biochemical functions as the phospholipids PG-DAG and PC-DAG, respectively, due  
672 to similar ionic charges at physiological pH. The former may be preferentially biosynthesized by  
673 phytoplankton and some bacteria as substitute lipids for PG-DAG and PC-DAG when phosphate starved  
674 (Benning, 1993; Van Mooy et al., 2006, 2009). Likewise, 1G-DAG, glycuronic acid diacylglycerol  
675 (GADG) and ornithine lipids may substitute for PE-DAG in marine bacteria (e.g., chemoheterotrophic  $\alpha$ -  
676 proteobacteria of the SAR11 clade of *Pelagibacter* sp.: Carini et al., 2015; the sulfate reducing bacterium,  
677 *Desulfovibrio alaskensis*: Bosak et al., 2016). In oligotrophic surface waters of the Sargasso Sea ( $\text{PO}_4^{3-}$   
678  $<10$  nM) ratios of SQ-DAG:PG-DAG and DGTS:PC-DAG are high (4 to 13) compared to the same ratios  
679 (3) in the phosphate replete South Pacific ( $\text{PO}_4^{3-} >100$  nM), consistent with cyanobacteria synthesizing  
680 phosphorus-free substitute lipids to maintain growth in response to phosphorus deprivation (Van Mooy et  
681 al., 2009). At the ETNP, SQ-DAG:PG-DAG ratios ranged between 1 and 10 within the upper 100-200  
682 m along the transect and were  $<1$  deeper into the OMZ (Fig. 3). DGTS:PC-DAG ratios in the ETNP  
683 were quite variable, ranging between 0.4 and 2.4 at most depths, but with notable spikes ( $>30$ ) within the  
684 oxic zone at station 5, within the upper core OMZ at station 2 and 8 and in the lower portion of the core  
685 OMZ at station 8. 1G-DAG:PE-DAG ratios were highly variable (0.2 to 945) and were highest within  
686 the upper OMZ at station 2, 5 and 8 and within the deep oxycline at station 8, where 1G-DAG:PE ratios  
687 range between 290 and 945 (Fig. 3). To test the substitute lipid hypothesis for the ETNP, we performed  
688 a Spearman Rank Order Correlation analysis of known substitute lipid ratios as well as total aminolipid  
689 (AL) to phospholipid (PL) and total glycolipid (GL) to PL ratios with nutrient concentrations and other  
690 environmental parameters. Only SQ-DAG:PG-DAG was significantly correlated with phosphate (-0.56,  
691  $p < 0.001$ ) but also correlated with other parameters, such as depth (-0.76,  $p < 0.001$ ) and oxygen

692 concentration (0.58,  $p < 0.001$ ). These correlations reflect the elevated SQ-DAG:PG-DAG ratios (2-8) in  
693 the surface waters and upper OMZ (Fig. 3) and support the notion that SQ-DAG might serve as a substitute  
694 lipid in both surface waters and the OMZ when phosphate concentrations are in the low micromolar range  
695 ( $\sim 0.1$ - $0.4 \mu\text{M}$  in surface waters;  $\sim 2$ - $3.5 \mu\text{M}$  in the OMZ). Other proposed substitute lipid ratios,  
696 DGTS:PC-DAG (Van Mooy et al., 2009) and 1G-DAG:PE-DAG (Carini et al., 2015), did not correlate  
697 with nutrient concentrations in the water column of the ETNP but rather showed highly variable  
698 distributions. Similarly, AL:PL ratios did not exhibit strong relationships with any environmental  
699 parameter, and GL:PL ratios showed similar but less pronounced trends as SQ-DAG:PG-DAG ratios.  
700 Overall, we observed no correlation between these substitute lipid ratios and phosphate concentration in  
701 the ETNP. We propose that non-phosphorus IPL within the OMZ of the ETNP originate from bacteria  
702 growing under low micromolar concentrations of phosphate. Indeed, the culture experiments of Bosak  
703 et al. (2016) demonstrated that the sulfate reducer, *Desulfovibrio alaskensis*, begins to replace most of its  
704 membrane phospholipids with 1G-DAG, glycuronic acid diacylglycerol and ornithine lipids even at  
705 phosphate concentrations as high as  $20 \mu\text{M}$ .

706

## 707 **5. Conclusions**

708 The water column of the ETNP is characterized by a diverse suite of intact polar lipids. IPL  
709 distributions reflect the dynamic nature of the biological community in the ETNP, with oxygen as a  
710 primary determinant, from fully oxygenated surface waters to a strong oxygen minimum zone at mid-  
711 depth. Highest concentrations of IPLs ( $250 - 1500 \text{ ng/L}$ ) in oxygenated surface waters zone results from  
712 abundant phototrophic eukaryotic and cyanobacterial sources above the OMZ. Secondary peaks in IPL

713 concentration (12 – 56 ng/L) within the core of the OMZ mirror elevated abundances of heterotrophic and  
714 chemoautotrophic bacteria and archaea under low oxygen conditions. Glycolipids derived from  
715 photoautotrophs generally accounted for more than 50% of total IPLs in the euphotic zone (< 200 m, oxic  
716 and upper OMZ zones), but bacterial phospholipids were more abundant (avg. 40%) in the OMZ and deep  
717 oxycline layers. Archaeal GDGTs were abundant within the OMZ and deep oxycline, consistent with  
718 elevated archaeal abundances there. Variations in major fatty acid constituents within IPL classes with  
719 acyl core moieties show that biological source(s) for the different IPL were distinct in each depth/oxygen-  
720 content horizon. Nevertheless, microbial sources for many of the detected lipids remain unclear and  
721 therefore potentially unique ecophysiological adaptations these lipids may represent remain to be explored.

722 The presence of the glycolipid, monoglycosyl diacylglycerol (1G-DAG), and the betaine lipid,  
723 diacylglyceryl homoserine (DGTS), both with varying fatty acid compositions, within all biogeochemical  
724 zones, and especially in the OMZ, indicates that these canonical phototrophic markers are not only  
725 biosynthesized in surface waters, but may indeed be produced in the aphotic water column and by a much  
726 larger host of organisms than previously thought. Since 1G-DAG and DGTS can be biosynthesized by  
727 various bacteria to replace phospholipids under phosphorus limited growth, we suggest that they serve as  
728 non-phosphorus substitute lipids for some microorganisms in the OMZ. The presence of these substitute  
729 lipids at micromolar concentrations of phosphate of the ETNP suggests that the paradigm of substitute  
730 lipid biosynthesis being restricted to the  $\text{PO}_4^{3-}$ -depleted oligotrophic surface ocean may need to be re-  
731 evaluated.

732

733 **Author contribution**

734 SGW collected the samples. SGW, FS and KUH designed the study. SX and FS measured and processed  
735 the data. JSL and FS performed statistical analyses. FS and SGW wrote the paper with input from SX,  
736 KUH and JSL.

737

### 738 **Competing interests**

739 The authors declare that they have no conflict of interest.

740

### 741 **Acknowledgments**

742 We are grateful to the captain and the crew of R/V *Seward Johnson*, to K. Daly and K. Wishner as co-  
743 chief scientists, and to the U.S. National Science Foundation for supporting the cruise. H. Albrecht, B.  
744 Olsen and S. Habtes helped with PM sampling. We thank K. Fanning and R. Masserini (University of  
745 South Florida) for providing their nutrient results; C. Flagg (Stony Brook) processed CTD hydrographic  
746 data; Jay Brandes and Mary Richards (Skidaway Institute) conducted the POC and TN analyses; B. Olson  
747 and K. Daly (University of South Florida) provided ship-board Chl-*a* analyses; and G. DeTullio (College  
748 of Charleston) conducted HPLC analyses of pigments. Lab supplies and analytical infrastructure for  
749 lipid analyses was funded by the Deutsche Forschungsgemeinschaft (DFG, Germany) through the Cluster  
750 of Excellence/Research Center MARUM. The UHPLC-QTOF instrument was granted by the DFG,  
751 Germany through grants Inst 144/300-1. S. Xie was funded by the China Scholarship Council, F.  
752 Schubotz by the Zentrale Forschungsförderung of the University of Bremen, and U.S. National Science  
753 Foundation grant OCE-0550654 to S. G. Wakeham supported this project. SGW also acknowledges a

754 Fellowship from the Hanse-Wissenschaftskolleg (Hanse Institute for Advanced Studies) in Delmenhorst,  
755 Germany.

756

757 **References**

758 Andreou, A., Brodhun, F., Feussner, I.: Biosynthesis of oxylipins in non-mammals, *Progr. Lip. Res.*, 48,  
759 148-170, 2009.

760 Bale, N. J., Hopmans, E. C., Schoon, P. L., de Kluijver, A., Downing, J. A., Middelburg, J. J., Sinninghe  
761 Damsté, J. S. and Schouten, S.: Impact of trophic state on the distribution of intact polar lipids in  
762 surface waters of lakes. *Limnol. Oceanogr.*, 61, 1065–1077, 2016.

763 Basse, A., Zhu, C., Versteegh, G.J.M., Fischer, G., Hinrichs, K.-U., and Mollenhauer, G.: Distribution of  
764 intact and core tetraether lipids in water column profiles of suspended particulate matter off Cape  
765 Blank, NW Africa, *Org. Geochem.*, 72, 1-13, 2014.

766 Benning, C., Beatty, J. T., Prince, R. C., and Somerville C. R.: The sulfolipid  
767 sulfoquinovosyldiacylglycerol is not required for photosynthetic electron transport in *Rhodobacter*  
768 *sphaeroides* but enhances growth under phosphate limitation, *Proc. Natl. Acad. Sci. USA*, 90, 1561–  
769 1565, 1993.

770 Bianchi, M., Marty, D., Teyssié, J.-L., and Fowler, S. W.: Strictly aerobic and anaerobic bacteria  
771 associated with sinking particulate matter and zooplankton fecal pellets, *Mar. Ecol. Press Ser.*, 88, 55-  
772 60, 1992.

773 Bosak, T., Schubotz, F., de Santiago-Torio, A., Kuehl, J. V., Carlson, H. K., Watson, N., Daye, M.,  
774 Summons, R. E., Arkin, A. P., and Deutschbauer A. M.: System-wide adaptations of *Desulfovibrio*

775 *alaskensis* G20 to phosphate-limited conditions, PLoS ONE 11, e0168719, 2016.

776 Brandsma, J., Hopmans, E. C., Philippart, C. J. M., Veldhuis, M. J. W., Schouten, S., and Sinninghe  
777 Damste, J. S.: Low temporal variation in the intact polar lipid composition of North Sea coastal marine  
778 water reveals limited chemotaxonomic value, Biogeosciences, 9, 1073–1084, 2012.

779 Brett, M. T., and Müller-Navarra, D. C.: The role of highly unsaturated fatty acids in aquatic foodweb  
780 processes, Freshw. Biol., 38, 483–499, 1997.

781 Carini P., Van Mooy B. A. S., Thrash J. C., White A., Zhao Y., Campbell E. O., Fredricks H. F., and  
782 Giovannoni S. J.: SAR11 lipid renovation in response to phosphate starvation. Proc. Natl. Acad. Sci.  
783 USA, 112, 7767–7772, 2015.

784 Carolan, M.T., Smith, J.M., and Beman, J.M.: Transcriptomic evidence for microbial sulfur cycling in the  
785 eastern tropical North Pacific oxygen minimum zone. Front. Microbiol. 6, 334, 2015.

786 Cass, C. J., and Daly, K. L.: Ecological characteristics of eucalanoid copepods of the eastern tropical  
787 North Pacific Ocean: Adaptations for life within a low oxygen system, J. Exp. Mar. Biol. Ecol., 468,  
788 118-129, 2015.

789 Cavan, E. L., Trimmer, M., Shelley, F., Sanders, R.: Remineralization of particulate organic carbon in an  
790 ocean oxygen minimum zone, Nat. Comm., 8, 14847, 2016.

791 Codispoti, L. A., and Richards, F. A.: An analysis of the horizontal regime of denitrification in the eastern  
792 tropical North Pacific. Limnology and Oceanography 21, 379-388, 1976.

793 DeBaar, H. J. W., Farrington, J. W. and Wakeham, S. G.: Vertical flux of fatty acids in the North Atlantic  
794 Ocean, J. Mar. Res., 41, 19-41, 1983.

795 DeLong, E. F. and Yayanos, A.: Biochemical function and ecological significance of novel bacterial lipids

796 in deep-sea procaryotes, *Appl. Environ. Microbiol.*, 51, 730-737, 1986.

797 Dembitsky, V.: Betaine ether-linked glycerolipids: Chemistry and biology, *Progr. Lip. Res.*, 35, 1-51,  
798 1996.

799 Diervo, A. J. and Reynolds, J. W.: Phospholipid composition and cardiolipin synthesis in fermentative  
800 and nonfermentative marine bacteria, *J. Bacteriol.* 123, 294-301, 1975.

801 DiTullio, G., and Geesey, M. E.: Photosynthetic Pigments in Marine Algae and Bacteria. In: G Bitton (ed),  
802 *Encyclopedia of Environmental Microbiology*, vol. 5, Wiley, pp 2453-2470, 2002.

803 Elling, F. J., Könneke, M., Mußmann, M., Greve, A., and Hinrichs, K.-U.: Influence of temperature, pH,  
804 and salinity on membrane lipid composition and TEX86 of marine planktonic thaumarchaeal isolates,  
805 *Geochim. Cosmochim. Acta*, 171, 238-255, 2015.

806 Elling, F. J., Könneke, M., Nicol, G. W., Stieglmeier, M., Bayer, B., Spieck, E., La Torre, De J. R., Becker,  
807 K. W., Thomm, M., Prosser, J. I., Herndl, G. J., Schleper, C., and Hinrichs, K.-U. Chemotaxonomic  
808 characterisation of the thaumarchaeal lipidome, *Environ. Microbiol.* 10, 1080, 2017.

809 Ertefai, T., Fisher, M., Fredricks, H. and Lipp, J.: Vertical distribution of microbial lipids and functional  
810 genes in chemically distinct layers of a highly polluted meromictic lake, *Org. Geochem.*, 39, 1572-  
811 1588, 2008.

812 Exterkate, F. A., and Veerkamp, J. H.: Biochemical changes in *Bifidobacterium bifidum* var.  
813 *Pennsylvanicus* after cell wall inhibition. I. Composition of lipids, *Biochim. Biophys. Acta*, 176, 65-  
814 77, 1969.

815 Fang, J., Kato, C., Sato, T., Chan, O., and McKay, D.: Biosynthesis and dietary uptake of polyunsaturated  
816 fatty acids by piezophilic bacteria. *Comp. Biochem. Physiology Part B*, 137 455-46, 2004.



817 Fiedler, P. C., and Talley, L. D.: Hydrography of the eastern tropical Pacific: A review. *Progr. Oceanogr.*,  
818 69, 143-180, 2006.

819 Franck, V. M., Smith, G. J., Bruland, K. W., and Brzezinski, M. A.: Comparison of size-dependent carbon,  
820 nitrate and silicic acid uptake rates in high- and low-iron waters. *Limnol. Oceanogr.*, 50, 825-838,  
821 2005.

822 Geiger, O., González-Silva, N., López-Lara, I. M., and Sohlenkamp, C.: Amino acid-containing  
823 membrane lipids in bacteria, *Progr. Lip. Res.*, 49, 46–60, 2010.

824 Geiger, O., Röhrs, V., Weissenmayer, B., Finan, T. M., and Thomas-Oates, J. E.: The regulator gene *phoB*  
825 mediates phosphate stress-controlled synthesis of the membrane lipid diacylglyceryl-N,N,N-  
826 trimethylhomoserine in *Rhizobium* (*Sinorhizobium*) *meliloti*, *Mol. Microbiol.*, 32, 63–73, 1999.

827 Geske, T., Dorp vom, K., Dörmann, P., and Hölzl G.: Accumulation of glycolipids and other non-  
828 phosphorous lipids in *Agrobacterium tumefaciens* grown under phosphate deprivation, *Glycobiol.*, 23,  
829 69–80, 2012.

830 Goericke, R., Olson, R. J., and Shalapyonok, A.: A novel niche for *Prochlorococcus* sp. in low-light  
831 suboxic environments in the Arabian Sea and the Eastern Tropical North Pacific, *Deep Sea Res. I*, 47,  
832 1183-1205, 2000.

833 Goldfine, H.: Bacterial membranes and lipid packing theory, *J. Lip. Res.*, 25, 1501–1507, 1984.

834 Goldfine, H., and Ellis, M. E.: N-methyl groups in bacterial lipids, *J. Bacteriol.*, 87, 8–15, 1964.

835 Gruber, N.: The marine nitrogen cycle: overview and challenges, in: *Nitrogen in the marine environment*,  
836 Eds. DG Capone, DA Bronk, MR Mulholland, EJ Carpenter, Burlington, MA, USA: Academic, 1-50,  
837 2008.

838 Harvey, R. H., Fallon R. D., and Patton, J. S.: The effect of organic matter and oxygen on the degradation  
839 of bacterial membrane lipids in marine sediments, *Geochim. Cosmochim. Acta*, 50, 795-804, 1986.

840 Hernandez-Sanchez, M. T., Homoky, W. B., and Pancost, R. D.: Occurrence of 1-O-monoalkyl glycerol  
841 ether lipids in ocean waters and sediment, *Org. Geochem.* 66, 1–13, 2014.

842 Hölzl, G., and Dörmann, P.: Structure and function of glycolipids in plants and bacteria, *Progr.*  
843 *Lip. Res.* 46, 225–243, 2007.

844 Hurley, S. J., Elling, F. J., Könneke, M., Buchwald, C., Wankel, S. D., Santoro, A. E., Lipp, J. S., Hinrichs,  
845 K.-U., and Pearson, A.: Influence of ammonia oxidation rate on thaumarchaeal lipid composition and  
846 the TEX86 temperature proxy, *Proc. Natl. Acad. Sci. USA*, 113, 7762-7767, 2016.

847 Kalvelage, T., Lavik, G., Jensen, M. M., Revsbech, N. P., Löscher, C., Schunck, H., Desai, D. K., Hauss,  
848 H., Kiko, R., Holtappels, M., LaRoche, J., Schmitz, R. A., Graco, M. I., and Kuypers, M. M. M.:  
849 Aerobic microbial respiration in oceanic oxygen minimum zones, *PLoS ONE*, 10(7):e0133526, 2015.

850 Karstensen, J., Stramma L., and Visbeck M.: Oxygen minimum zones in the eastern tropical Atlantic and  
851 Pacific oceans, *Progr. Oceanogr.*, 77, 331-350, 2008.

852 Kato, T., Yamaguchi, Y., Hirano, T., and Yokoyama, T.: Unsaturated hydroxy fatty acids, the self  
853 defensive substances in rice plant against rice blast disease, *Chem. Let.*, 409-412, 1984.

854 Keeling, R. F., Körtzinger, A., and Gruber N.: Ocean deoxygenation in a warming world, *Annu. Rev.*  
855 *Marine. Sci.*, 2, 199–229, 2010.

856 Kharbush, J. J., Allen, A. E., Moustafa, A., Dorrestein, P.C., Aluwihare, L. I.: Intact polar diacylglycerol  
857 biomarker lipids isolated from suspended particulate organic matter accumulating in an  
858 ultraoligotrophic water column, *Org. Geochem.*, 100, 29-41, 2016.

859 Lam, P. and Kuypers, M. M. M.: Microbial nitrogen cycling processes in oxygen minimum zones, *Annu.*  
860 *Rev. Marine. Sci.*, 3, 317–345, 2011.

861 Landry, M. R., Selph, K. E., Taylor, A.G., Décima, M., Balch, W. M., and Bidigare R. R.: Phytoplankton  
862 growth, grazing and production balances in the HNLC equatorial Pacific, *Deep Sea Res. I*, 58, 524-  
863 535, 2011.

864 Lavín, M. F., Fiedler, P. C., Amador, J. A., Balance, L. T., Färber-Lorda, J., Mestas-Nuñez, A. M.: A  
865 review of eastern tropical Pacific oceanography: Summary, *Progr. Oceanogr.*, 69, 391-398, 2006.

866 Lee C., and Cronin C.: Particulate amino acids in the sea: Effects of primary productivity and biological  
867 decomposition, *J. Mar. Res.*, 42, 1075-1097, 1984.

868 Lehninger A. L.: Oxidation of fatty acids, in: *Biochemistry*, New York: Worth, 417-432, 1970.

869 Lengger, S. K., Hopmans, E. C., Reichart, G.-J., Nierop, K. G. J., Sinninghe Damsté, J. S., and Schouten,  
870 S.: Intact polar and core glycerol dibiphytanyl glycerol tetraether lipids in the Arabian Sea oxygen  
871 minimum zone. Part II: Selective preservation and degradation in sediments and consequences for  
872 the TEX86, *Geochim. Cosmochim. Acta*, 98, 244–258, 2012.

873 Lin, X., Wakeham, S. G., Putnam, I. F., Astor, Y. M., Scranton, M. I., Chistoserdov, A. Y., and Taylor, G.  
874 T.: Comparison of vertical distributions of prokaryotic assemblages in the anoxic Cariaco Basin and  
875 Black Sea by use of fluorescence in situ hybridization, *Appl. Environ. Microbiol.*, 72, 2679-2690,  
876 2006.

877 Lincoln, S. A., Wai, B., Eppley, J. M., Church, M. J., Summons, R. E. and DeLong, E. F.: Planktonic  
878 Euryarchaeota are a significant source of archaeal tetraether lipids in the ocean, *Proc. Natl. Acad. Sci.*  
879 *USA*, 111, 9858–9863, 2014.

880 Lynch, D. V., and Dunn, T. M.: An introduction to plant sphingolipids and a review of recent advances in  
881 understanding their metabolism and function, *New Phytol.*, 161, 677-702, 2004.

882 Ma, Y., Zeng, Y., Jiao, N., Shi, Y., and Hong, N.: Vertical distribution and phylogenetic composition of  
883 bacteria in the Eastern Tropical North Pacific Ocean, *Microbiol. Res.*, 164, 624-663, 2009.

884 Maas, A. E., Frazar, S. L., Outram, D.M., Seibel, B. A., and Wishner, K. F.: Fine-scale vertical  
885 distributions of macroplankton and micronekton in the Eastern Tropical North Pacific in association  
886 with an oxygen minimum zone, *J Plankt. Res.*, 36, 1557-1575, 2014.

887 Martin, J. H., Knauer, G. A., Karl, D. M., and Broenkow, W. W.: VERTEX: carbon cycling in the northeast  
888 Pacific, *Deep-Sea Research* 34, 267-285, 1987.

889 Matos, A. R., and Pham-Thi, A.-T.: Lipid deacylating enzymes in plants: Old activities, new genes. *Plant*  
890 *Physiol. and Biochem.* 47, 491-503, 2009.

891 Meador, T. B., Gagen, E. J., Loscar, M. E., Goldhammer, T., Yoshinaga, M. Y., Wendt, J., Thomm, M.,  
892 and Hinrichs, K.-U.: *Thermococcus kodakarensis* modulates its polar membrane lipids and elemental  
893 composition according to growth state and phosphate availability, *Front. Microbiol.*, 5:10,  
894 doi:10.3389/fmicb.2014.00010, 2014.

895 Mileykovskaya, E., and Dowhan, W.: Cardiolipin membrane domains in prokaryotes and eukaryotes,  
896 *Biochim. Biophys. Acta* 1788, 2084–2091, 2009.

897 Morita, Y. S., Yamaro-Botte, Y., and Miyanagi, K.: Stress-induced synthesis of phosphatidylinositol 3-  
898 phosphate in mycobacteria, *J. Biol. Chem.* 285, 16643-16650, 2010.

899 Neal, A. C., Prahl, F. G., Eglinton, G., O'Hara, S. C. M., and Corner, E. D. S.: Lipid changes during a  
900 planktonic feeding sequence involving unicellular algae, Elminius Nauplii and Adult Calanus, *J. Mar.*

901 Biol. Assoc. UK, 66, 1-13, 1986.

902 Neidleman, S. L.: Effects of temperature on lipid unsaturation: Biotechnology and Genetic Engineering  
903 Reviews, 5:1, 245-268, 1987.

904 Oliver, J. D., and Colwell, R. R.: Extractable lipids of gram-negative marine bacteria: Phospholipid  
905 composition, J. Bacteriol. 114, 897-908, 1973.

906 Olson, M. B., and Daly, K. L.: Micro-grazer biomass, composition and distribution across prey resource  
907 and dissolved oxygen gradients in the far eastern tropical north Pacific Ocean, Deep Sea Res. I, 75,  
908 28-38, 2014.

909 Okuyama, H., Kogame, K., and Takeda, S.: Phylogenetic significance of the limited distribution of  
910 octadecapentaenoic acid in prymnesiophytes and photosynthetic dinoflagellates, Proc. NIPR Symp.  
911 Polar Biol., 6, 21-26, 1993.

912 Parsons, T. R., Takahashi, M., and Hargrave B. (Eds.): Biological Oceanographic Processes, 3<sup>rd</sup> ed.,  
913 Pergamon Press, NY, 1984.

914 Paulmier, A., and Ruiz-Pino, D.: Oxygen minimum zones (OMZs) in the modern ocean, Progr. Oceanogr.  
915 80, 113-128, 2009.

916 Pennington, J. T., Mahoney, K. L., Kuwahara, V. S., Kolber, D. D., Cienes, R., Chavez, F. P.: Primary  
917 production in the eastern tropical Pacific: A review, Progr. Oceanogr., 69, 285-317, 2006.

918 Pitcher, A., Villanueva, L., Hopmans, E. C., Schouten, S., Reichart, G.-J. and Sinninghe Damsté, J. S.:  
919 Niche segregation of ammonia-oxidizing archaea and anammox bacteria in the Arabian Sea oxygen  
920 minimum zone, ISME J., 5, 1896-1904, 2011.

921 Podlaska, A., Wakeham, S. G., Fanning, K. A., and Taylor, G. T.: Microbial community structure and

922 productivity in the oxygen minimum zone of the eastern tropical North Pacific, *Deep-Sea Res. Part I*,  
923 66, 77–89, 2012.

924 Popendorf, K., Lomas, M., and Van Mooy, B.: Microbial sources of intact polar diacylglycerolipids in the  
925 Western North Atlantic Ocean, *Org. Geochem.* 42, 803-811, 2011a.

926 Popendorf, K. J., Tanaka, T., Pujo-Pay, M., Lagaria, A., Courties, C., Conan, P., Oriol, L., Sofen, L. E.,  
927 Moutin, T., and Van Mooy, B. A. S.: Gradients in intact polar diacylglycerolipids across the  
928 Mediterranean Sea are related to phosphate availability, *Biogeosci.* 8, 3733–3745, 2011b.

929 Prahl, F. G., Eglinton, G., Corner, E. D. S., O'Hara, D. C. M., and Forsberg, T. E. V.: Changes in plant  
930 lipids during passage through the gut of *Calanus*, *J. Mar. Biol. Assoc. UK*, 1984.

931 Rabinowitz, G. B.: An introduction to nonmetric multidimensional scaling, *Amer. J. Polit. Sci.*, 343-90,  
932 1975.

933 Rappé, M. S., and Giovannoni, S. J.: The uncultured microbial majority, *Annu. Rev. Microbiol.*, 57, 369-  
934 394, 2003.

935 Rojas-Jiménez, K., Sohlenkamp, C., Geiger, O., Martínez-Romero, E., Werner, D., and Vinuesa, P.: A  
936 CIC chloride channel homolog and ornithine-containing membrane lipids of *Rhizobium tropici*  
937 CIAT899 are involved in symbiotic efficiency and acid tolerance, *Mol. Plant-Microbe Interact.*, 18,  
938 1175–1185, 2005.

939 Rush, D., Wakeham, S. G., Hopmans, E. C., Schouten, S., and Damsté, J. S. S.: Biomarker evidence for  
940 anammox in the oxygen minimum zone of the Eastern Tropical North Pacific, *Org. Geochem.*, 53,  
941 80–87, 2012.

942 Rütters, H., Sass, H., Cypionka, H., and Rullkötter, J.: Monoalkylether phospholipids in the sulfate-

943 reducing bacteria *Desulfosarcina variabilis* and *Desulforhabdus amnigenus*, *Arch. Microbiol.*, 176,  
944 435–442, 2011.

945 Schouten, S., Pitcher, A., Hopmans, E. C., Villanueva, L., Van Bleijswijk, J., and Sinninghe Damsté, J.  
946 S.: Intact polar and core glycerol dibiphytanyl glycerol tetraether lipids in the Arabian Sea oxygen  
947 minimum zone: I. Selective preservation and degradation in the water column and consequences for  
948 the TEX86, *Geochim. Cosmochim. Acta*, 98, 228–243, 2012.

949 Schubotz, F., Wakeham, S. G., Lipp, J., Fredricks, H. F., and Hinrichs, K.-U.: Detection of microbial  
950 biomass by intact polar membrane lipid analysis in the water column and surface sediments of the  
951 Black Sea, *Environ. Microbiol.*, 11, 2720-2734, 2009.

952 Sebastian, M., Smith, A. F., González, J. M., Fredricks, H. F., Van Mooy, B., Koblížek, M., Brandsma,  
953 J., Koster, G., Mestre, M., Mostajir, B., Pitta, P., Postle, A. D., Sánchez, P., Gasol, J. M., Scanlan, D.  
954 J., and Chen, Y.: Lipid remodelling is a widespread strategy in marine heterotrophic bacteria upon  
955 phosphorus deficiency, *ISME J*, 10, 968–978, 2016.

956 Seibel, B.A.: Critical oxygen levels and metabolic suppression in oceanic oxygen minimum zones, *J. Exp.*  
957 *Biol.*, 214, 326-336, 2011.

958 Seidel, M., Graue, J., Engelen, B., Köster, J., Sass, H., and Rullkötter, J.: Advection and diffusion  
959 determine vertical distribution of microbial communities in intertidal sediments as revealed by  
960 combined biogeochemical and molecular biological analysis, *Org. Geochem.*, 52, 114–129, 2012.

961 Shanks, A. L., and Reeder, M. L.: Reducing microzones and sulfide production in marine snow. *Marine*  
962 *Ecology Press Series 96*, 43-47, 1993.

963 Siegenthaler P.-A.: Molecular organization of acyl lipids in photosynthetic membranes of higher plants,

964 in: *Lipids in Photosynthesis*, Siegenthaler, P.-A., and Murata, N. (Eds). Dordrecht, the Netherlands:  
965 Kluwer Academic Publishers, 119–144, 1998.

966 Sohlenkamp, C., López-Lara, I. M., and Geiger, O.: Biosynthesis of phosphatidylcholine in bacteria, *Progr.*  
967 *Lip. Res.*, 42, 115–162, 2003.

968 Sollai, M., Hopmans, E. C., Schouten, S., Keil, R. G., and Sinninghe Damsté, J.S.: Intact polar lipids of  
969 Thaumarchaeota and anammox bacteria as indicators of N cycling in the eastern tropical North Pacific  
970 oxygen-deficient zone, *Biogeosci.*, 12, 4833-4864, 2015.

971 Stevens H., and Ulloa, O.: Bacterial diversity in the oxygen minimum zone of the eastern tropical South  
972 Pacific, *Environ. Microbiol.*, 10, 1244–1259, 2008.

973 Stramma, L., Johnson, G. C., Sprintall, J., and Mohrholz, V.: Expanding Oxygen-Minimum Zones in the  
974 Tropical Oceans, *Science*, 320, 655-658, 2008.

975 Stramma, L., Schmidtko, S., Levin, L. A., and Johnson, G. C.: Ocean oxygen minima expansions and their  
976 biological impacts, *Deep Sea Res. I*, 57, 587-595, 2010.

977 Sturt, H. F., Summons, R. E., Smith, K.E., Elvert, M., Hinrichs, K.-U.: Intact polar membrane lipids in  
978 prokaryotes and sediments deciphered by high-performance liquid chromatography/electrospray  
979 ionization multistage mass spectrometry - new biomarkers for biogeochemistry and microbial ecology,  
980 *Rapid Comm. Mass Spec.*, 18, 617-628, 2004.

981 Taylor, G. T., Iabichella, M., Ho, T.-Y., Scranton, M. I., Thunell, R. C., Muller-Karger, F., and Varela R.:  
982 Chemoautotrophy in the redox transition zone of the Cariaco Basin: A significant midwater source of  
983 organic carbon production, *Limnol. Oceanogr.*, 46, 148-163, 2001.

984 Tiano, L., Garcia-Robledo, E., Dalsgaard, T., Devol, A. H., Ward, B. B., Ulloa, O., Canfield, D. E., and



985 Revsbech, N. P.: Oxygen distribution and aerobic respiration in the north and south eastern tropical  
986 Pacific oxygen minimum zones, *Deep Sea Res. I*, 94, 173-183, 2014.

987 Turich, C., and Freeman, K. H.: Archaeal lipids record paleosalinity in hypersaline systems, *Org.*  
988 *Geochem.* 42, 1147-1157, 2011.

989 Ulloa, O., Canfield, D., DeLong, E. F., Letelier, R. M., and Stewart, F. J.: Microbial oceanography of  
990 anoxic oxygen minimum zones, *Proc. Natl. Acad. Sci., USA* 109, 15996-16003, 2012.

991 Valentine, R. C., and Valentine, D. L.: Omega-3 fatty acids in cellular membranes: a unified concept,  
992 *Progr. Lip. Res.* 43, 383–402, 2004.

993 Van Mooy, B. A. S., and Fredricks, H. F.: Bacterial and eukaryotic intact polar lipids in the eastern  
994 subtropical South Pacific: Water-column distribution, planktonic sources, and fatty acid composition,  
995 *Geochim. Cosmochim. Acta*, 74, 6499–6516, 2010.

996 Van Mooy, B. A. S., Fredricks, H. F., Pedler, B. E., Dyhrman, S. T., Karl, D. M., Koblížek, M., Lomas,  
997 M. W., Mincer, T. J., Moore, L. R., Moutin, T., Rappé, M. S., and Webb, E. A.: Phytoplankton in the  
998 ocean use non-phosphorus lipids in response to phosphorus scarcity, *Nature*, 458, 69–72, 2009.

999 Van Mooy, B. A. S., Rocap, G., Fredricks, H. F., Evans, C. T., and Devol, A. H.: Sulfolipids dramatically  
1000 decrease phosphorus demand by picocyanobacteria in oligotrophic marine environments, *Proc. Natl.*  
1001 *Acad. Sci. USA*, 103, 8607–8612, 2006.

1002 Vardi, A., Van Mooy, B. A. S., Fredricks, H. F., Popen Dorf, K. J., Ossolinski, J. E., Haramty, L., and Bidle,  
1003 K. D.: Viral glycosphingolipids induce lytic infection and cell death in marine phytoplankton, *Science*,  
1004 326, 861-865, 2009.

1005 Wada, H., and Murata, N.: Membrane Lipids in cyano- bacteria, in: *Lipids in Photosynthesis: Structure,*

006 Function and Genetics, Siegenthaler, P., and Murata, N. (Eds), Dordrecht, the Netherlands: Kluwer  
007 Academic Publishers, 65–81, 1998.

008 Wakeham, S. G., Turich, C., Schubotz, F., Podlaska, A., Li, X. N., Varela, R., Astor, Y., Sáenz, J. P.,  
009 Rush, D., Sinninghe Damsté, J. S., Summons, R. E., Scranton, M. I., Taylor, G. T., and Hinrichs, K.-  
010 U.: Biomarkers, chemistry and microbiology show chemoautotrophy in a multilayer chemocline in  
011 the Cariaco Basin, *Deep Sea Res. Part I*, 63, 133–156, 2012.

012 Wakeham, S. G., Amann, R., Freeman, K. H., Hopmans, E. C., Jørgensen, B. B., Putnam, I. F., Schouten,  
013 S., Sinninghe Damsté, J. S., Talbot, H. M., and Woebken, D.: Microbial ecology of the stratified water  
014 column of the Black Sea as revealed by a comprehensive biomarker study, *Org. Geochem.*, 38, 2070–  
015 2097, 2007.

016 Wakeham, S. G.: Monocarboxylic, dicarboxylic and hydroxy acids released by sequential treatments of  
017 suspended particles and sediments of the Black Sea, *Org. Geochem.* 30, 1059-1074, 1999.

018 Wakeham, S. G.: Reduction of stenols to stanols in particulate matter at oxic-anoxic boundaries in sea  
019 water, *Nature*, 342, 787-790, 1989.

020 Wakeham, S. G., and Canuel, E. A.: Organic geochemistry of particulate matter in the eastern tropical  
021 North Pacific Ocean: Implications for particle dynamics, *J. Mar. Res.*, 46, 182-213, 1988.

022 Wakeham, S. G.: Steroid geochemistry in the oxygen minimum zone of the eastern tropical North Pacific  
023 Ocean, *Geochim. Cosmochim. Acta*, 51, 3051-3069, 1987.

024 Williams, R. L., Wakeham, S., McKinney, R., Wishner, K. F.: Trophic ecology and vertical patterns of  
025 carbon and nitrogen stable isotopes in zooplankton from oxygen minimum zone regions, *Deep Sea*  
026 *Res. I*, 90 36-47, 2014.

027 Wishner, K. F., Outram, D. M., Seibel, B. A., Daly, K. L., and Williams, R. L.: Zooplankton in the eastern  
028 tropical north Pacific: Boundary effects of oxygen minimum zone expansion, *Deep Sea Res. I*, 79,  
029 122-140, 2013.

030 Wishner, K. F., Gelfman, C., Gowing, M. M., Outram, D. M., Rapien, M., and Williams, R. L.: Vertical  
031 zonation and distributions of calanoid copepods through the lower oxycline of the Arabian Sea oxygen  
032 minimum zone, *Progr. Oceanogr.*, 78, 163-191, 2008.

033 Woebken, D., Fuchs, B. M., Kuypers, M. M. M, and Aman, R.: Potential interactions of particle-associated  
034 anammox bacteria with bacterial and archaeal partners in the Namibian upwelling system, *Appl.*  
035 *Environ. Microbiol.*, 73, 4648-4657, 2007.

036 Wörmer, L., Lipp, J. S., Schröder, J. M., and Hinrichs, K.-U.: Application of two new LC-ESI-MS  
037 methods for improved detection of intact polar lipids (IPLs) in environmental samples, *Org. Geochem.*  
038 59, 10–21, 2013.

039 Wright, J. J., Konwar, K. M., and Hallam, S. J: Microbial ecology of expanding oxygen minimum zones,  
040 *Nat. Rev. Microbiol.* 10, 381-394, 2012.

041 Xie, S., Liu, X.-L., Schubotz, F., Wakeham, S. G., and Hinrichs K.-U.: Distribution of glycerol ether lipids  
042 in the oxygen minimum zone of the Easter Tropical North Pacific Ocean, *Org. Geochem.* 71, 60–71,  
043 2014.

044 Yao, M., Elling, F. J., Jones, C., Nomosatryo, S., Long, C. P., Crowe, S. A., Antoniewicz, M. R., Hinrichs,  
045 K.-U., and Maresca, J. A.: Heterotrophic bacteria from an extremely phosphate-poor lake have  
046 conditionally reduced phosphorus demand and utilize diverse sources of phosphorus, *Environ.*  
047 *Microbiol.* 18, 656–667, 2015.

048 Zavaleta-Pastor, M., Sohlenkamp, C., Gao, J. L., Guan, Z., Zaheer, R., Finan, T. M., Raetz, C. R. H.,  
049 López-Lara, I. M., and Geiger, O.: Sinorhizobium meliloti phospholipase C required for lipid  
050 remodeling during phosphorus limitation, *Proc. Natl. Acad. Sci. USA*, 107, 302–307, 2010.

051 Zhang, Y.-M., and Rock, C. O.: Membrane lipid homeostasis in bacteria, *Nat. Rev. Microbiol.*, 6, 222–  
052 233, 2008.

053 Zhu, C., Wakeham, S. G., Elling, F. J., Basse, A., Mollenhauer, G., Versteegh, G. J. M., Könneke, M.,  
054 and Hinrichs, K.-U.: Stratification of archaeal membrane lipids in the ocean and implications for  
055 adaptation and chemotaxonomy of planktonic archaea, *Environ. Microbiol.* 18, 4324-4336, 2016.

056

057 **Tables**

058 **Table 1.** Spearman Rank Order Correlation coefficients (r) for data combined from all four stations. Only  
059 significant correlations, where  $p < 0.05$  (highly significant  $p < 0.001$ , in bold), are presented.

|              | Glycolipids |              |              |       |              | Aminolipids |      |        |       |         | Phospholipids |       |       |       |       |        |
|--------------|-------------|--------------|--------------|-------|--------------|-------------|------|--------|-------|---------|---------------|-------|-------|-------|-------|--------|
|              | % GL        | % 1G         | % 2G         | % SQ  | GL:PL        | SQ:PG       | % AL | % DGTS | AL:PL | DGTS:PC | % PL          | % PC  | % PG  | % PE  | % PME | % PDME |
| Depth        | -0.32       | -0.7         | -0.67        | -0.41 | -0.76        |             |      |        |       |         |               |       |       |       |       |        |
| Fluorescence |             | <b>0.63</b>  | <b>0.67</b>  |       | <b>0.65</b>  |             |      |        |       |         |               |       |       |       |       |        |
| POC          |             | <b>0.61</b>  | <b>0.6</b>   |       | <b>0.6</b>   |             |      |        |       |         |               |       |       |       |       |        |
| TN           |             | <b>0.66</b>  | <b>0.62</b>  |       | <b>0.63</b>  |             |      |        |       |         |               |       |       |       |       |        |
| Oxygen       | <b>0.57</b> | 0.3          | <b>0.48</b>  | 0.35  | <b>0.55</b>  | <b>0.58</b> |      | 0.36   |       |         | <b>-0.49</b>  | -0.38 | -0.33 | -0.46 | -0.52 |        |
| Temperature  | 0.3         | <b>0.52</b>  | <b>0.63</b>  | 0.39  | <b>0.69</b>  |             |      |        |       |         |               |       |       |       |       |        |
| Chl a        | 0.35        | <b>0.72</b>  | <b>0.71</b>  | 0.42  | 0.78         |             |      |        |       |         |               |       |       |       |       | -0.33  |
| Phosphate    |             | <b>-0.62</b> | <b>-0.53</b> | -0.4  | <b>-0.56</b> |             |      |        |       |         |               |       |       |       |       | 0.36   |
| Nitrate      |             | <b>-0.53</b> | <b>-0.49</b> |       | -0.38        |             |      |        |       |         |               |       |       |       |       |        |
| Nitrite      |             | -0.33        |              |       |              |             |      |        |       |         |               |       |       |       |       | 0.3    |
| Ammonium     |             |              |              |       |              |             | 0.41 | 0.42   | 0.35  | 0.4     |               |       |       |       |       |        |
| N:P          |             | -0.3         | -0.32        |       |              |             |      |        |       |         |               |       |       |       |       | -0.36  |

Abbreviations: GL – glycolipids, 1G – monoglycosyl, 2G – diglycosyl, SQ – sulfoquinovosyl, PL – phospholipids, AL – aminolipids, DGTS – diacylglyceryl trimethyl homoserine, PC – phosphatidyl choline, PG – phosphatidyl glycerol, PE – phosphatidyl ethanolamine, PME – phosphatidyl methyl-ethanolamine, PDME – phosphatidyl dimethyl-ethanolamine

.061 **Figures**

.062 **Figure 1.** a) Map of ETNP with R/V *Seward Johnson* (November 2007) cruise sampling stations  
.063 investigated in this study.

.064

.065 **Figure 2.** Depth profiles of (a) oxygen and temperature, (b) chlorophyll- $\alpha$  and transmissivity, (c)  
.066 particulate organic matter (POC) and C:N, (d) intact polar lipid (IPL) to POC ratio and IPL concentration,  
.067 and (e) absolute cell abundance and relative proportions of archaeal cells (data from Podlaska et al. (2012)).  
.068 C:N (SPM) is total carbon over total nitrogen of the solid phase collected by water filtration. Note that  
.069 C:N, POC and IPL/POC are only analyzed for  $<53 \mu\text{m}$  particle fraction. Also depicted are the different  
.070 geochemical zones in the water column.

.071

.072 **Figure 3.** Depth profiles of (a) nitrate, nitrite, and ammonium, (b) phosphate and N:P, (c) total non-  
.073 archaeal (non-isoprenoidal) phospholipids, glycolipids and (d) aminolipids shown as percent of total intact  
.074 polar lipids and ratios of non-phospholipids to phospholipids for DGTS to PC-DAG (e) SQ-DAG to PG-  
.075 DAG, (e), and 1G-DAG to PE-DAG. Also depicted are the different geochemical zones in the water  
.076 column.

.077

.078 **Figure 4.** Relative abundance of (a) major and (b) minor IPLs at sampled depths of stations 1, 2, 5, and 8  
.079 in the ETNP. Major IPLs are defined as those comprising more than 10% of total IPLs (minor compounds  
.080 comprised less than 10%) at more than one depth horizon at the four stations. Also depicted are the  
.081 different geochemical zones in the water column.

.082

.083 **Figure 5.** Changes in average carbon atoms (CA) and number of double bond equivalents (DB) of the  
.084 alkyl side chains of major IPLs detected at stations 1, 2, 5 and 8 in the ETNP.

.085

.086 **Figure 6.** Nonmetric multidimensional scaling (NMDS) ordination plot assessing the relationship between  
.087 IPL biomarkers, sampling depths and geochemical parameters in the ETNP (stress=0.125). Squares  
.088 represent the water depth of each sample and are color-coded according to the defined geochemical  
.089 zonation. Filled circles stand for lipid distribution of major IPLs and open circles for minor IPLs on the  
.090 ordination. Vector lines of geochemical parameters are weighted by their p-values with each NMDS axis.

.091



fig01

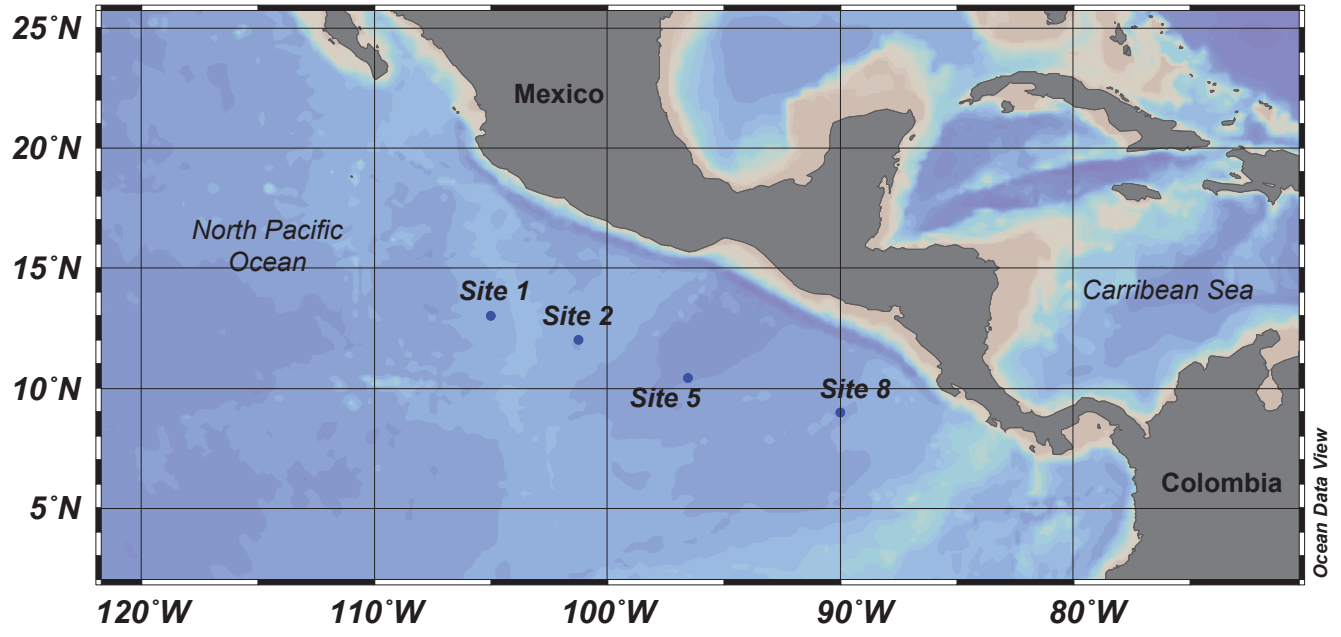

fig02

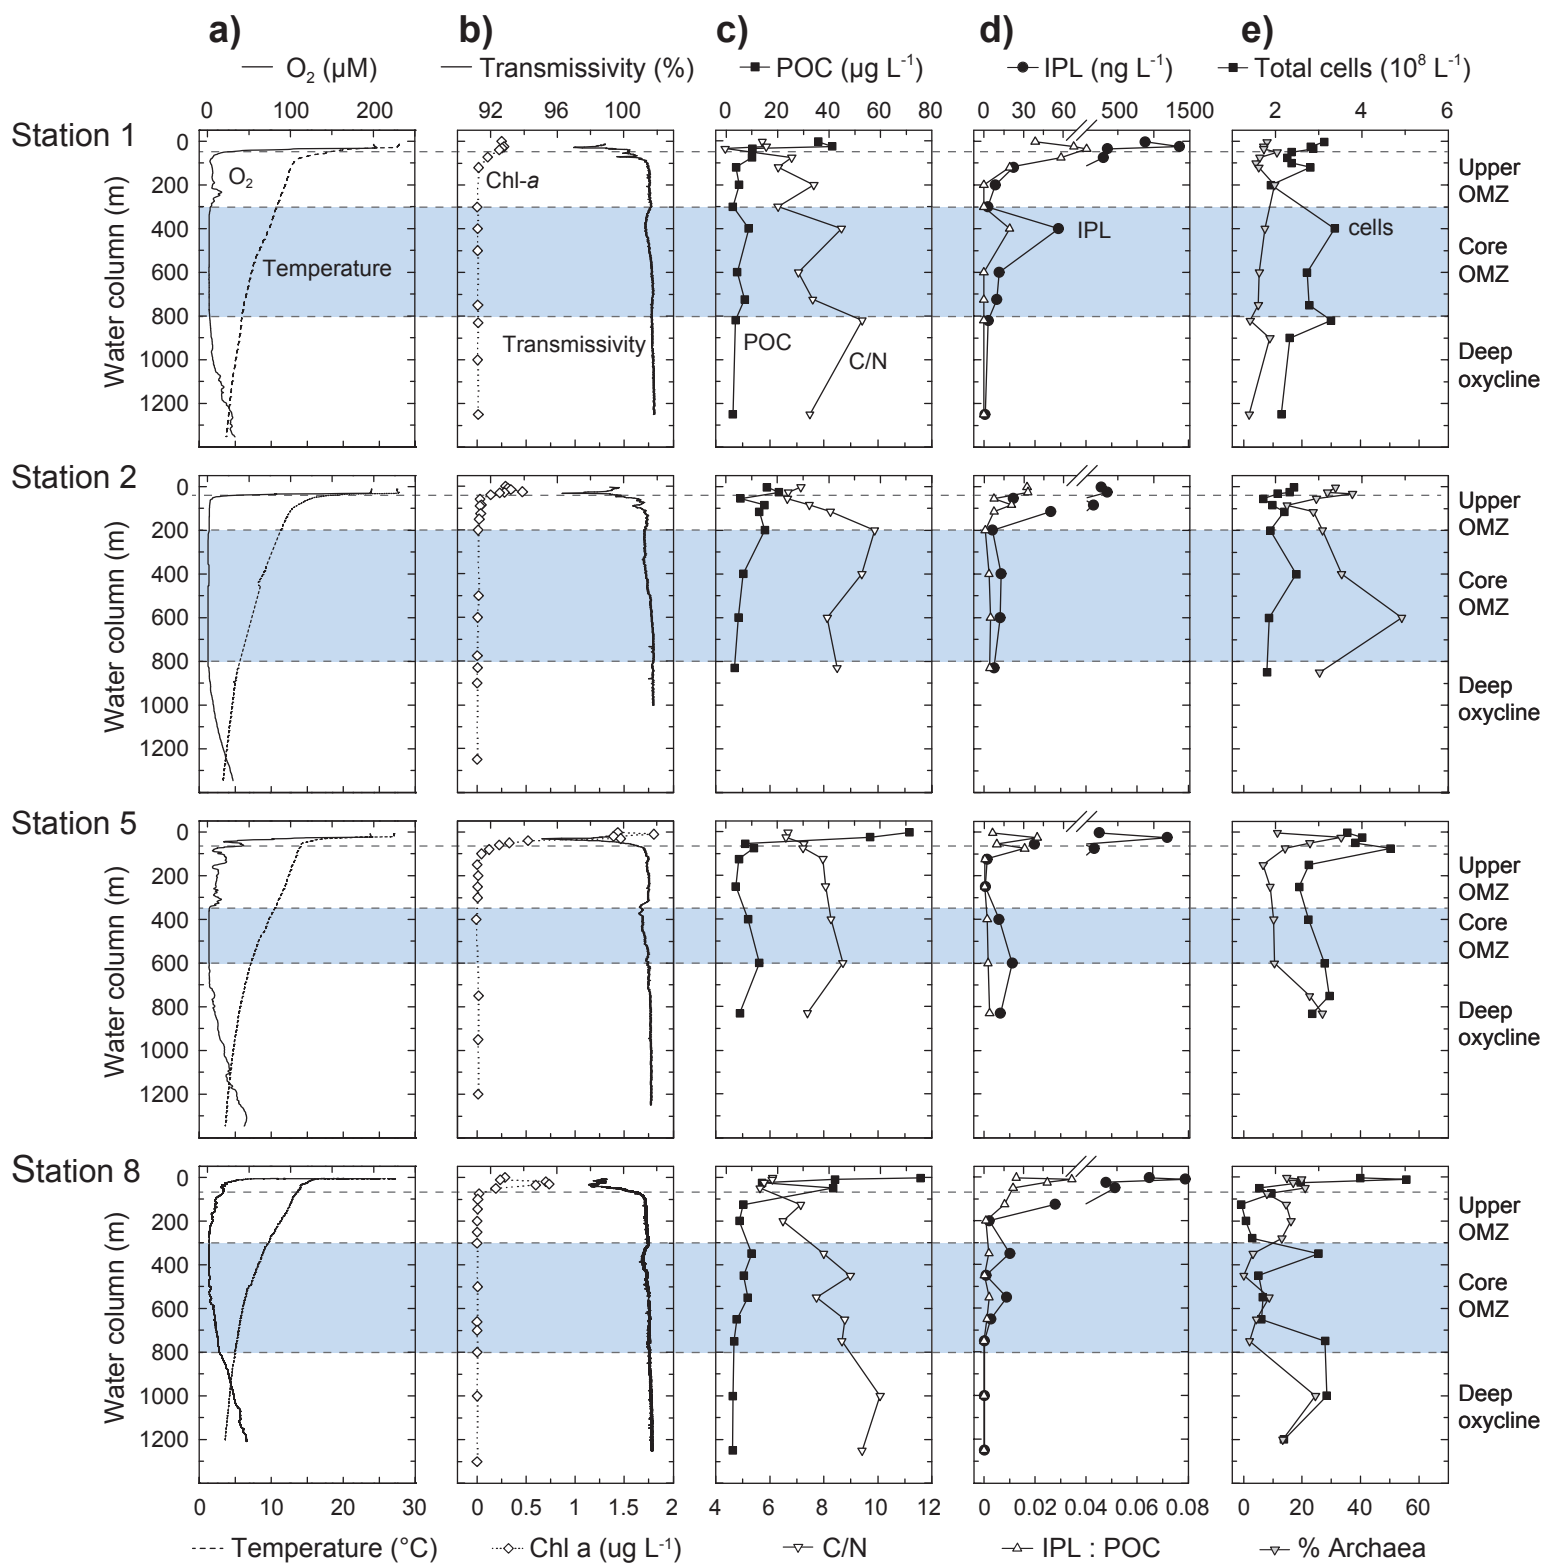

fig03

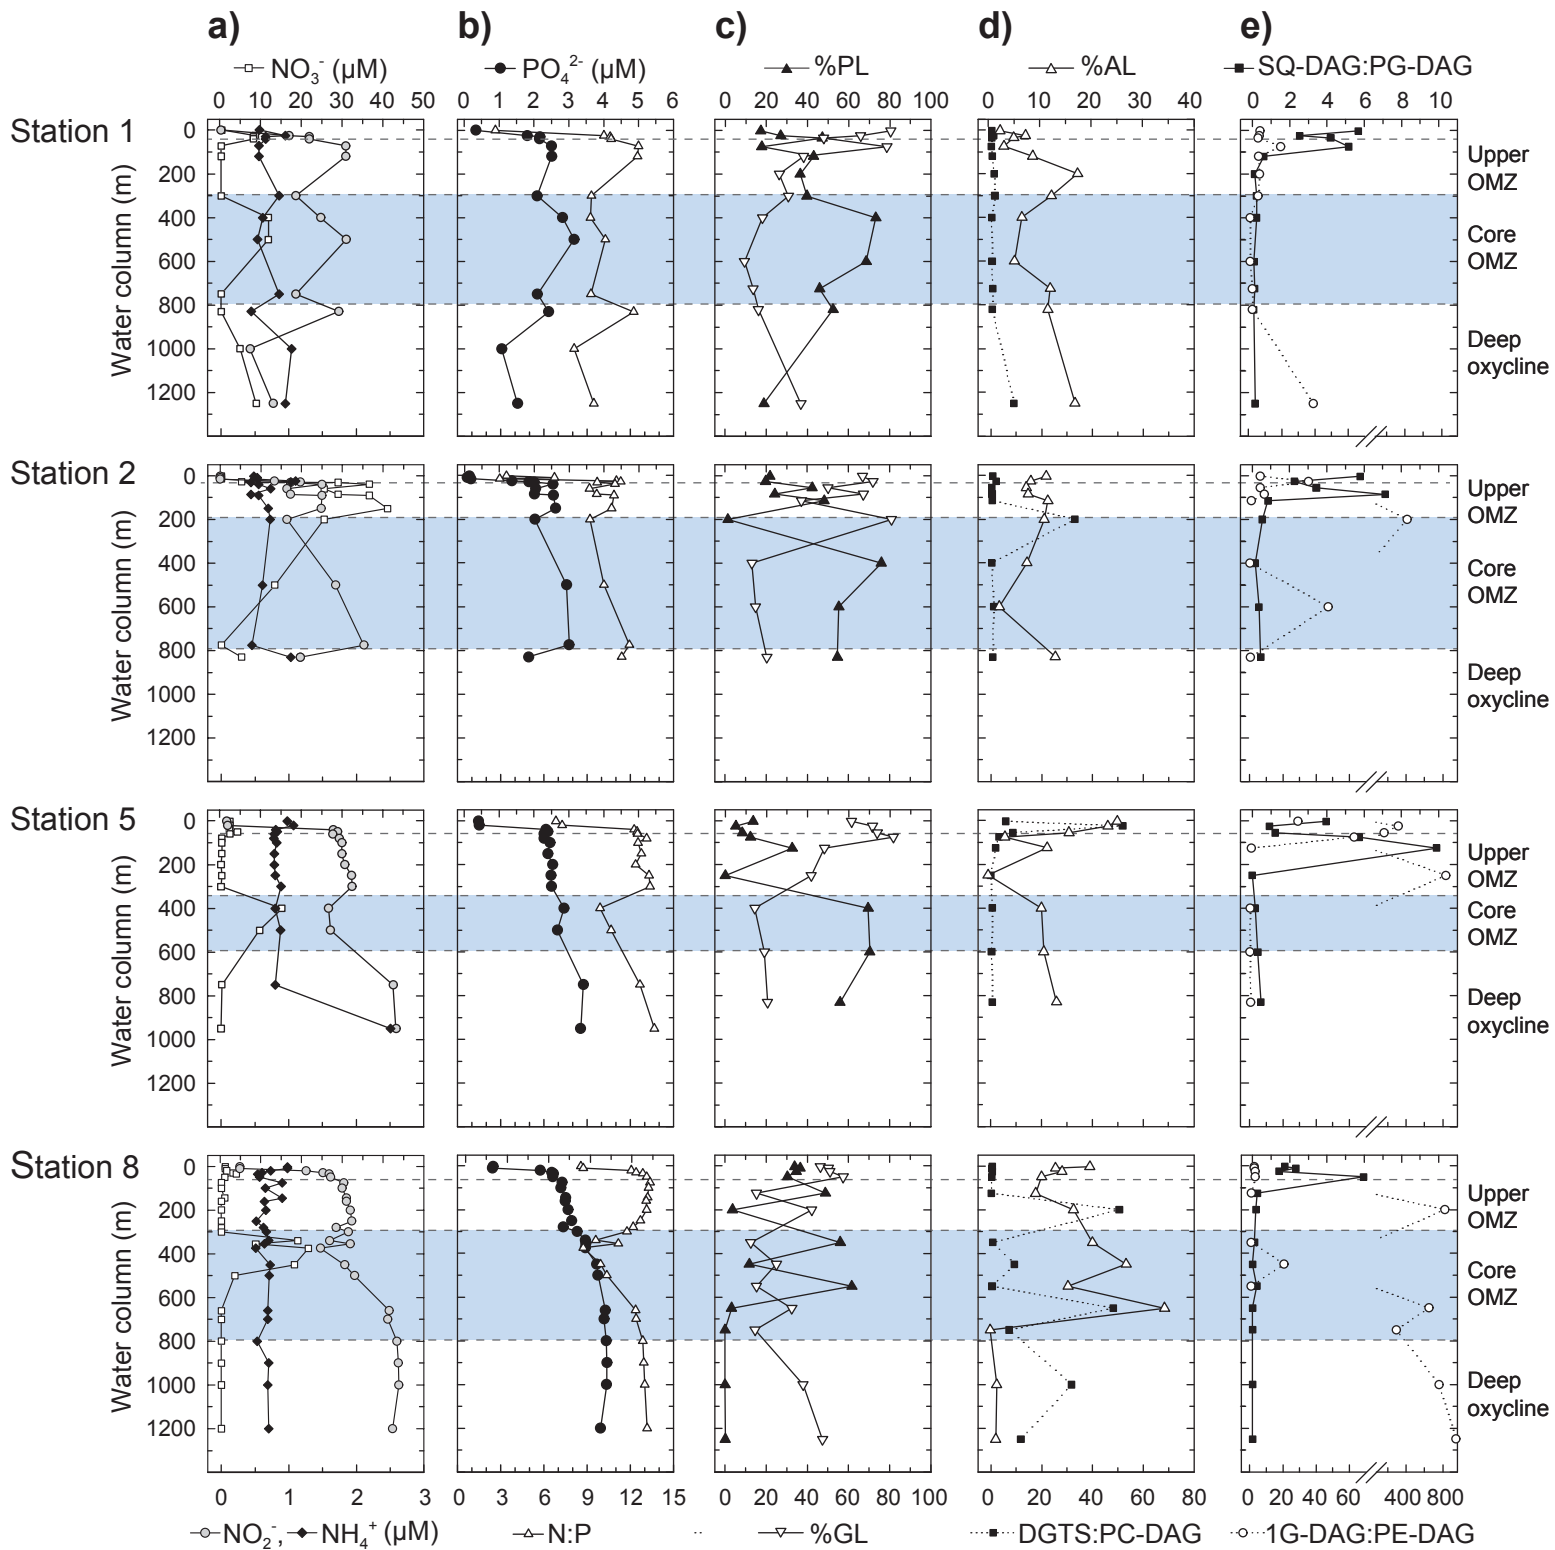

### Major compounds

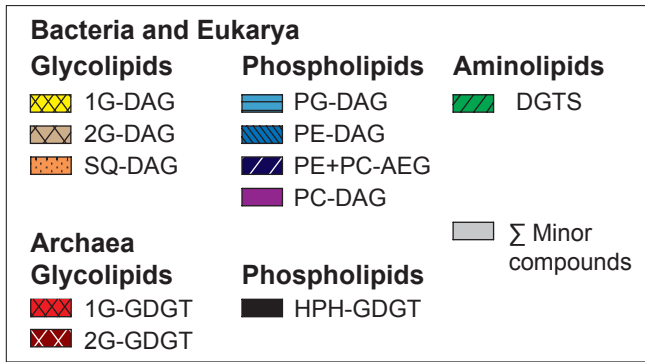

### Minor compounds

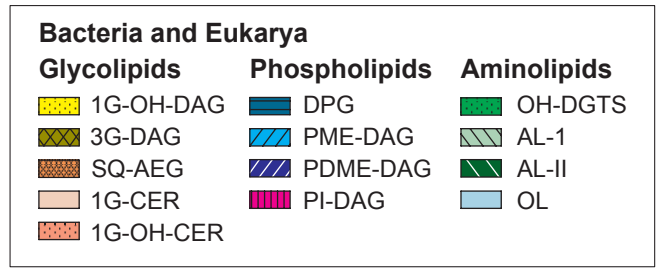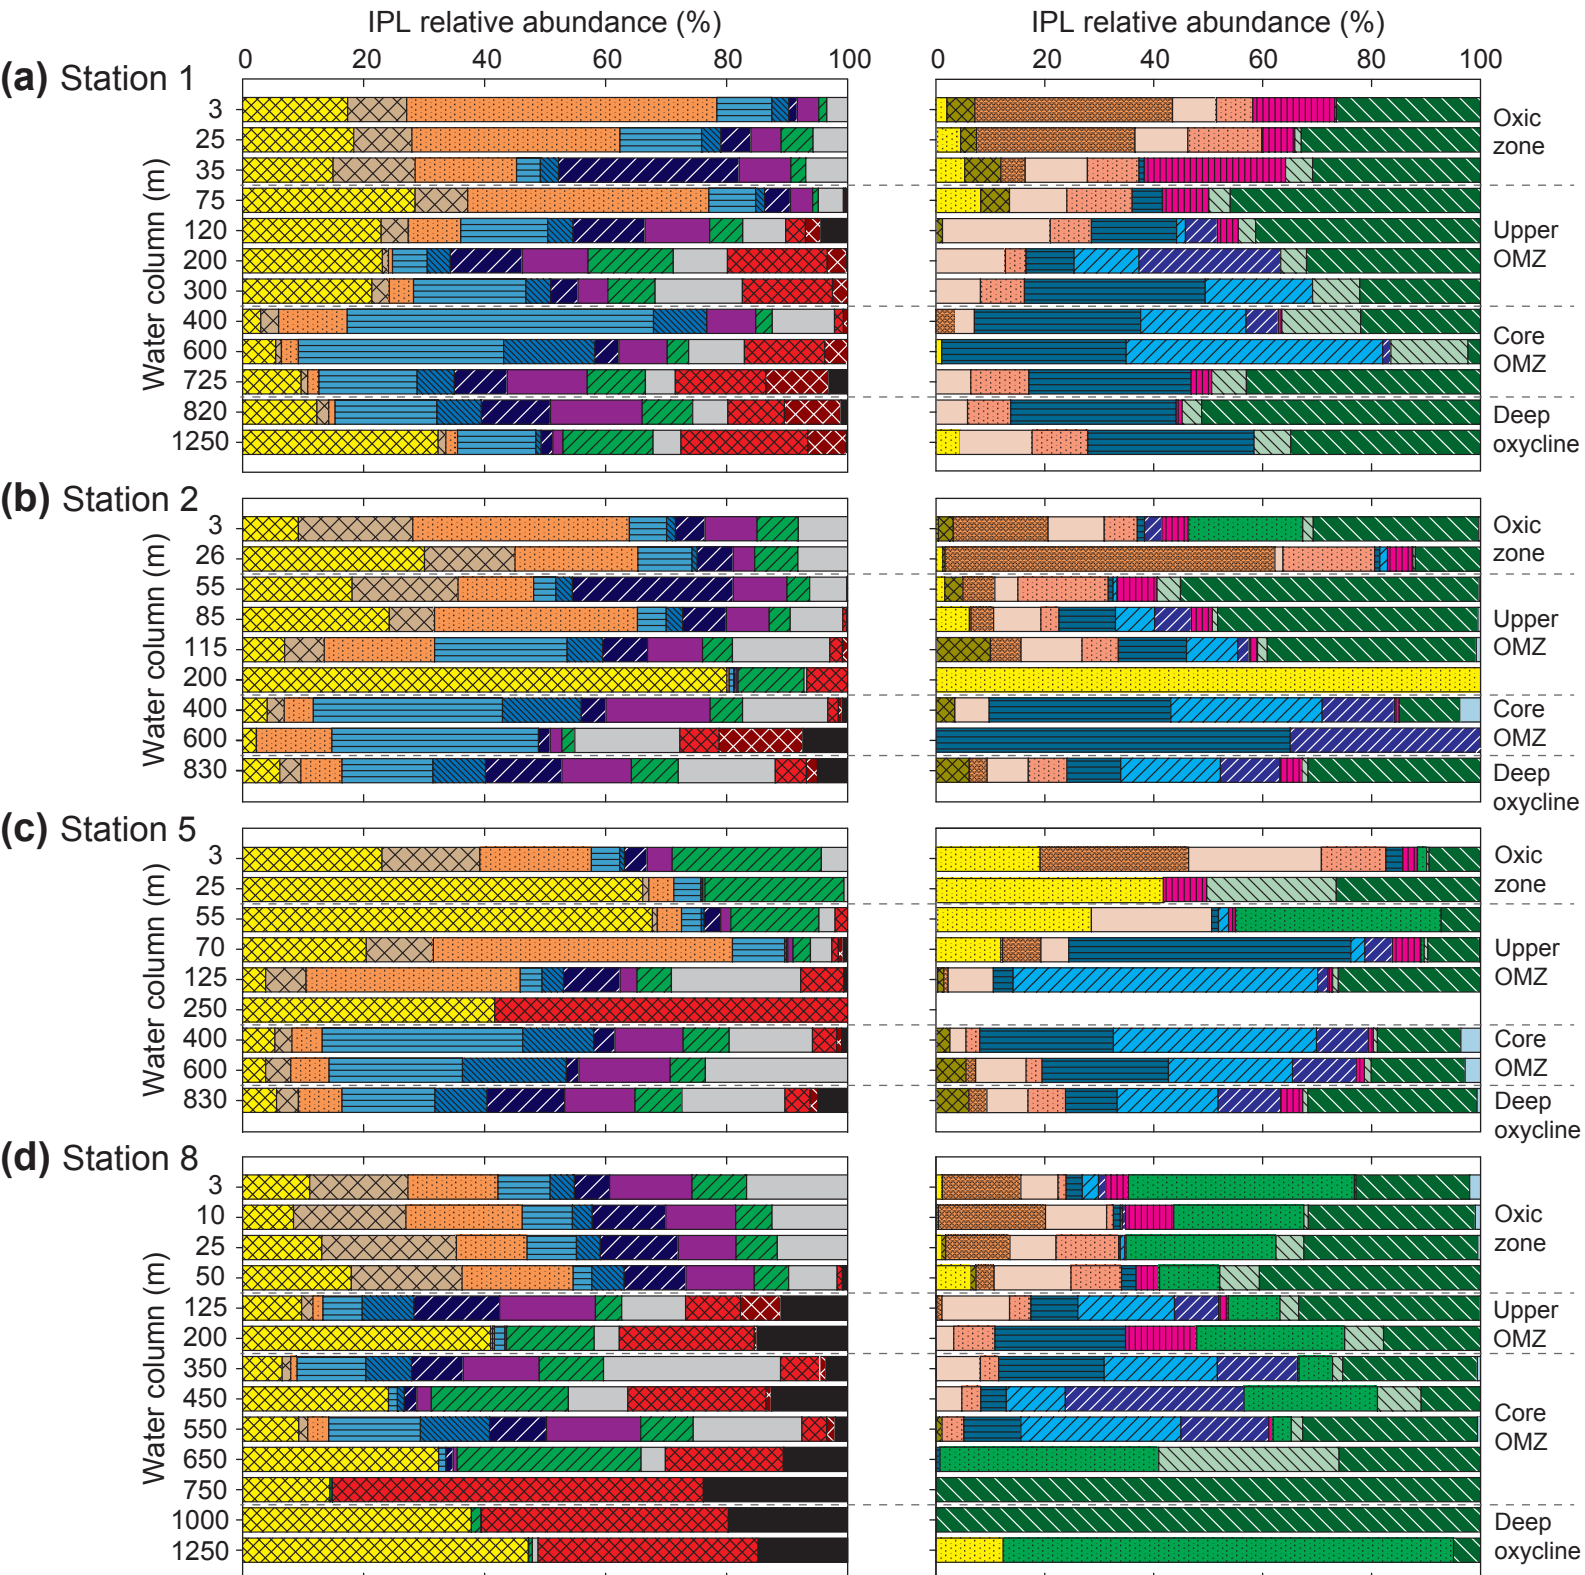

fig05

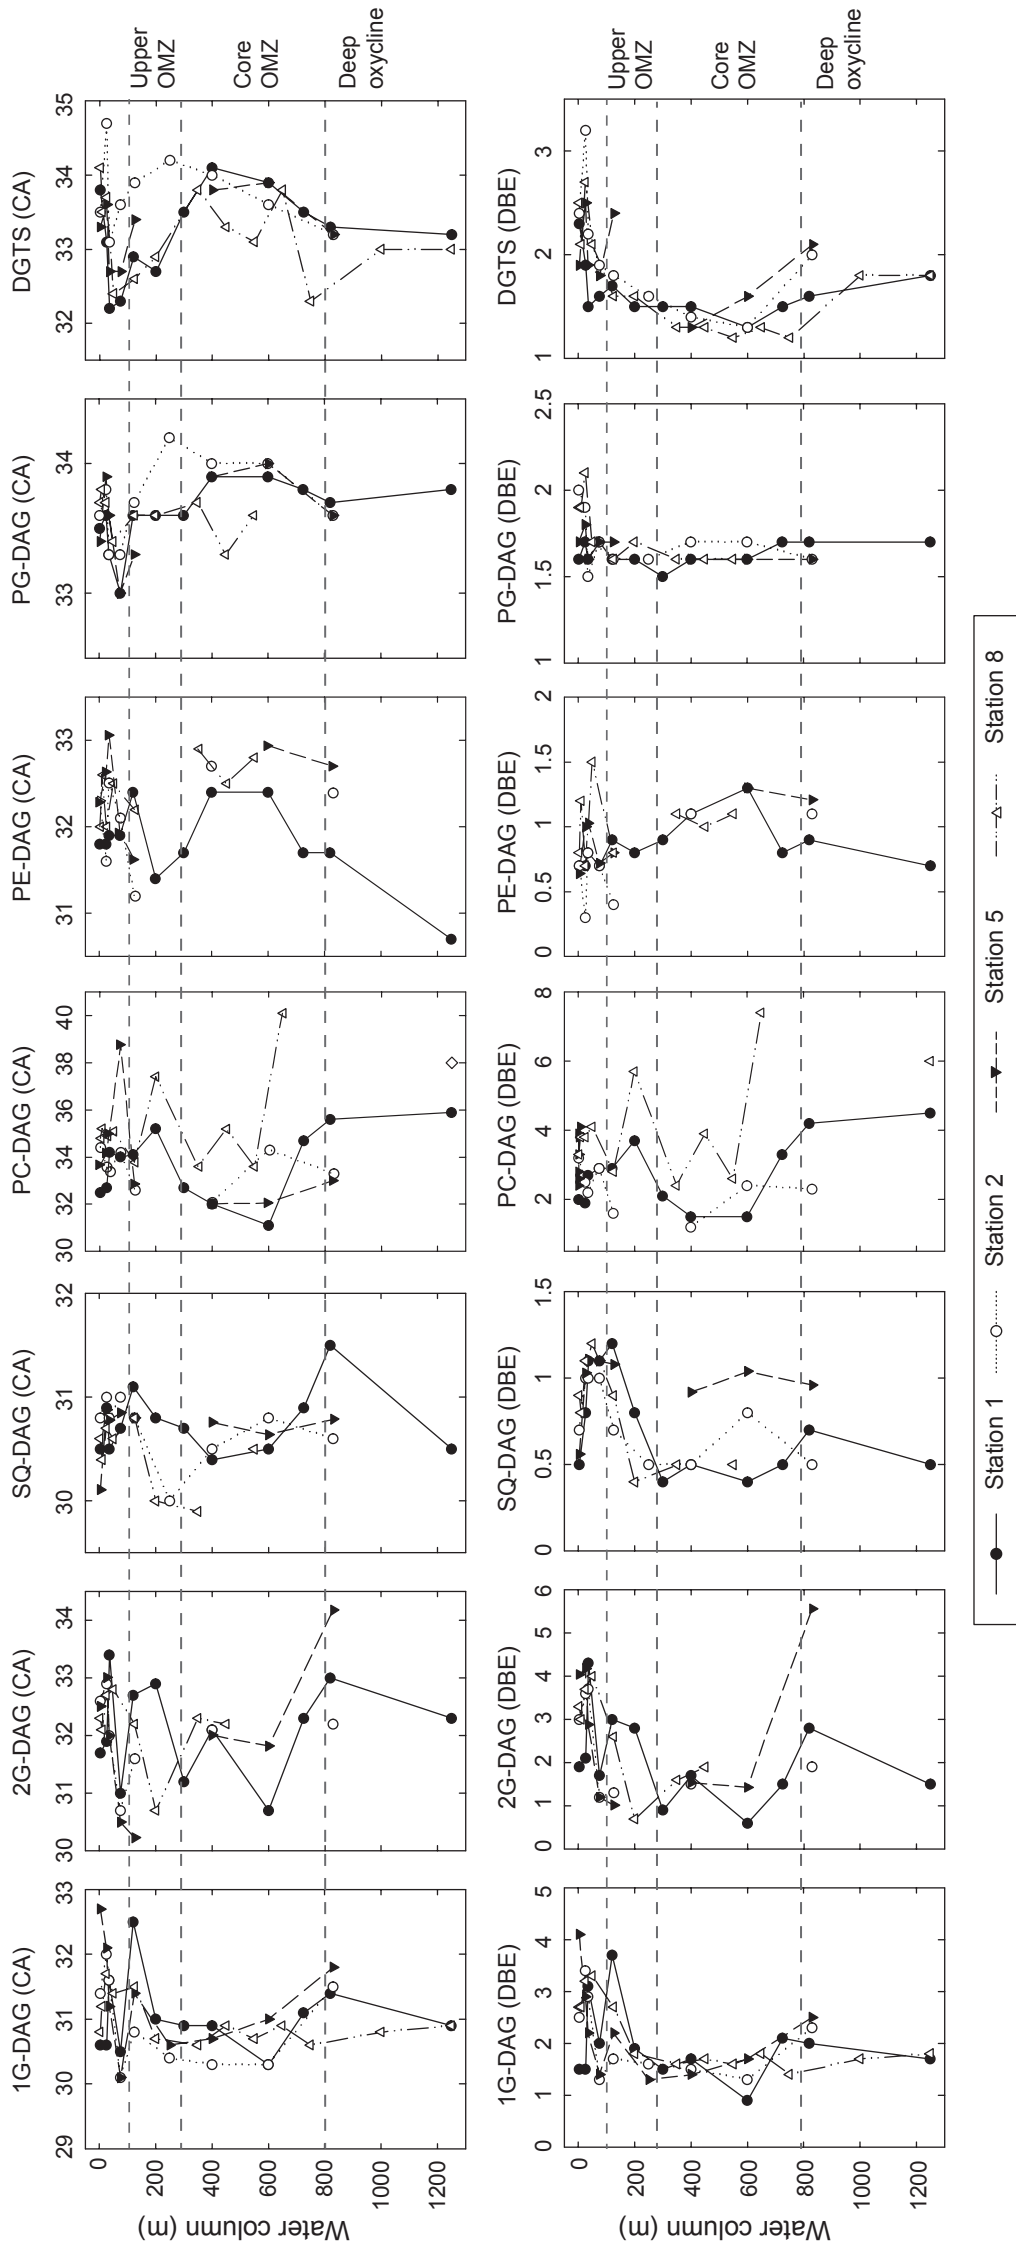

fig06

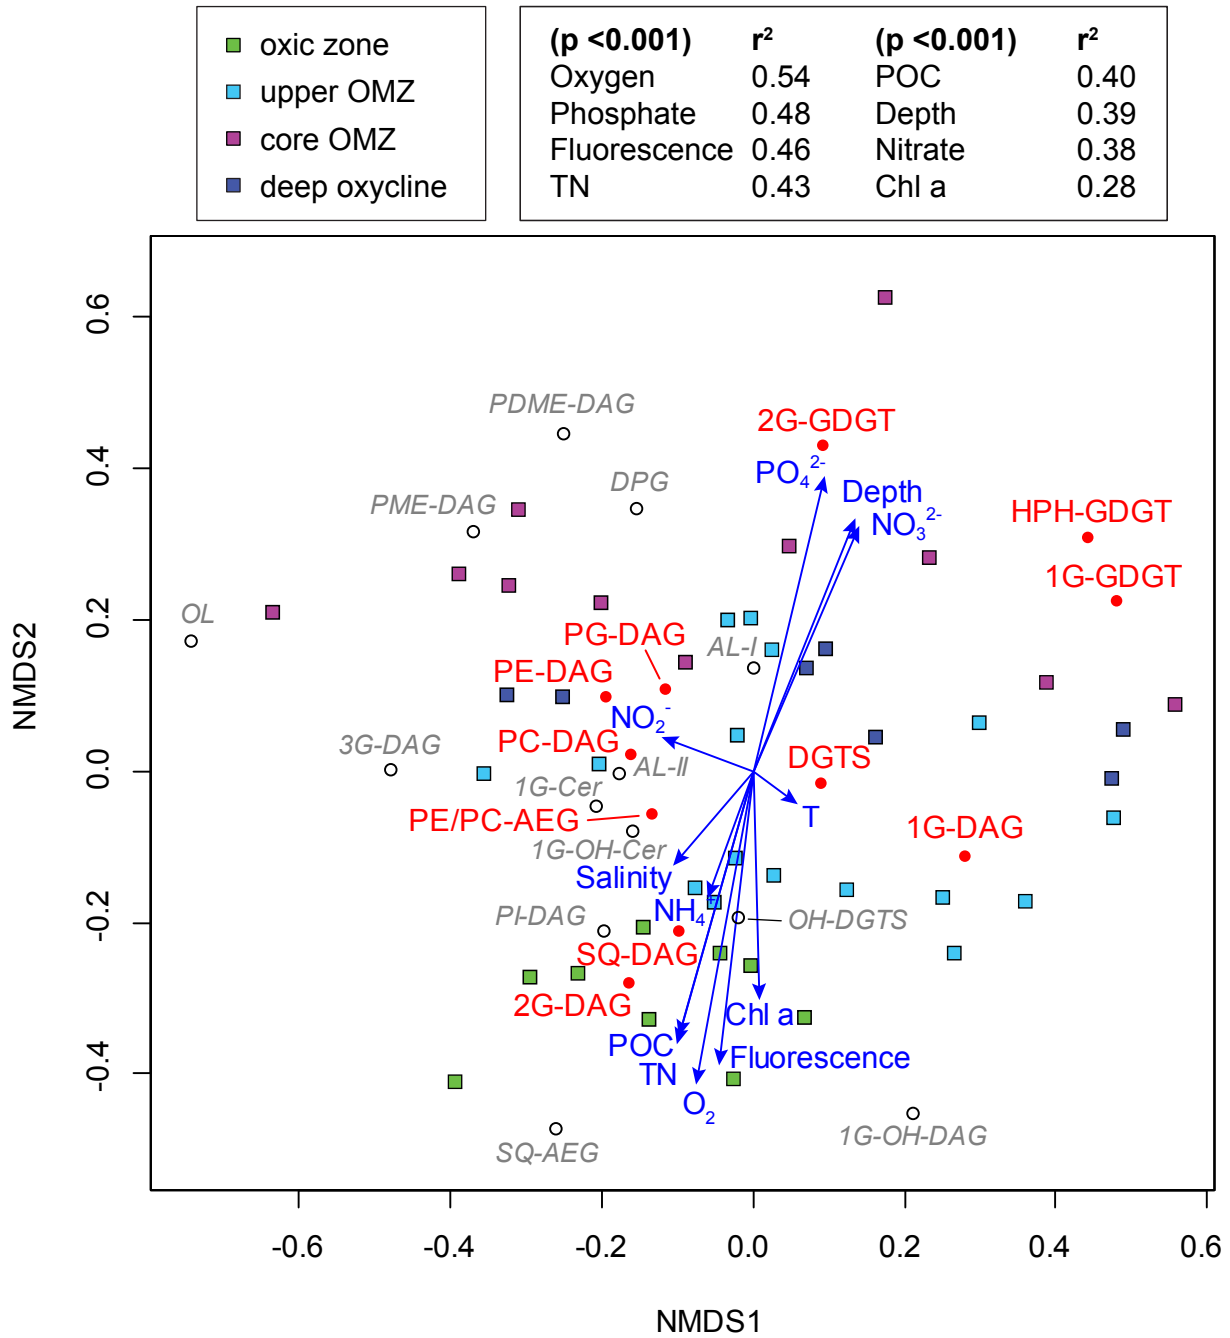

Supplement: Supplementary file [file bg-2018-119-AC4-supplement.pdf]
