# Supplementary material for: Diversity of intact polar lipids in the oxygen minimum zone of the Eastern Tropical North Pacific: Biogeochemical implications of non-phosphorus lipids
Source: Copernicus journal article supplement (doi:10.5194/bg-2018-119), 2018-03-13

**Diversity of intact polar lipids in the oxygen minimum zone of the Eastern Tropical North Pacific:**

**Biogeochemical implications of non-phosphorus lipids**

Florence Schubotz <sup>1\*</sup>, Sitan Xie <sup>1,¶</sup>, Julius S. Lipp <sup>1</sup>, Kai-Uwe Hinrichs <sup>1</sup>, Stuart G. Wakeham <sup>2</sup>

<sup>1</sup>MARUM Center for Marine Environmental Sciences and Department of Geosciences, University of Bremen, 28359 Bremen, Germany

<sup>2</sup>Skidaway Institute of Oceanography, Savannah, GA 31411, USA

<sup>¶</sup>Current address: Wai Gao Qiao Free Trade Zone, 200131 Shanghai, China

\*Corresponding author. MARUM, University of Bremen, Leobener Str. 13, Room 1070, 28359 Bremen, Germany. Tel: +49-421-218-65724. Fax: +49-421-218-65715. E-mail: schubotz@uni-bremen

**Suppl. Table 1.** Relative abundance of detected intact polar lipids (IPL) at all four stations (1, 2, 5 and 8) in the Eastern Tropical North

Pacific, t.a. - trace amounts, n.d. - not detected. For IPL abbreviations refer to main text.

| Station | Depth (m) | Water filtered (L) | Total IPL (ng/L) | Relative Abundance (%) |        |        |      |           |        |        |        |      |        |        |        |      |       |      |         |          |        |           |           |         |         |         |          |
|---------|-----------|--------------------|------------------|------------------------|--------|--------|------|-----------|--------|--------|--------|------|--------|--------|--------|------|-------|------|---------|----------|--------|-----------|-----------|---------|---------|---------|----------|
|         |           |                    |                  | IG-DAG                 | 2G-DAG | 3Q-DAG | DGTS | PE+PC-AEG | PE-DAG | PC-DAG | PG-DAG | DPG  | 3G-DAG | SQ-DEG | IG-Cer | AL-I | AL-II | OL   | PME-DAG | PDME-DAG | PI-DAG | IG-OH-DAG | IG-OH-Cer | OH-DGTS | IG-GDGT | 2G-GDGT | HPH-GDGT |
| 1       | 3         | 575                | 882.3            | 17.4                   | 9.8    | 51.2   | 1.3  | 1.4       | 2.8    | 3.5    | 9.0    | 0.0  | 0.2    | 1.3    | 0.3    | t.a. | 0.9   | n.d. | n.d.    | n.d.     | 0.5    | 0.1       | 0.2       | n.d.    | n.d.    | n.d.    | n.d.     |
| 1       | 25        | 193                | 1357.8           | 18.4                   | 9.6    | 34.3   | 5.3  | 4.9       | 3.2    | 5.0    | 13.5   | 0.0  | 0.2    | 1.7    | 0.6    | 0.1  | 1.9   | n.d. | n.d.    | n.d.     | 0.3    | 0.3       | 0.8       | n.d.    | n.d.    | n.d.    | n.d.     |
| 1       | 35        | 1636               | 361.6            | 15.0                   | 13.5   | 16.7   | 2.4  | 29.8      | 3.0    | 8.5    | 4.0    | 0.1  | 0.5    | 0.3    | 0.8    | 0.3  | 2.2   | n.d. | n.d.    | n.d.     | 1.8    | 0.4       | 0.7       | n.d.    | n.d.    | n.d.    | n.d.     |
| 1       | 75        | 1013               | 304.0            | 28.5                   | 8.7    | 39.8   | 0.9  | 4.2       | 1.5    | 3.7    | 7.7    | 0.2  | 0.2    | n.d.   | 0.4    | 0.2  | 1.9   | n.d. | n.d.    | n.d.     | 0.4    | 0.3       | 0.5       | n.d.    | 0.2     | 0.1     | 0.4      |
| 1       | 120       | 1347               | 22.3             | 22.9                   | 4.5    | 8.6    | 5.5  | 11.8      | 4.2    | 10.7   | 14.4   | 1.1  | 0.1    | n.d.   | 1.4    | 0.2  | 2.9   | n.d. | 0.1     | 0.4      | 0.3    | n.d.      | 0.5       | n.d.    | 3.3     | 2.6     | 4.5      |
| 1       | 200       | 1578               | 8.4              | 23.2                   | 1.0    | 0.7    | 14.0 | 11.9      | 3.8    | 10.9   | 5.7    | 0.8  | n.d.   | n.d.   | 1.1    | 0.4  | 2.9   | n.d. | 1.1     | 2.3      | n.d.   | n.d.      | 0.3       | n.d.    | 16.4    | 3.2     | 0.3      |
| 1       | 300       | 1337               | 2.9              | 21.4                   | 2.9    | 4.0    | 7.8  | 4.5       | 4.1    | 4.9    | 18.5   | 4.8  | n.d.   | n.d.   | 1.2    | 1.2  | 3.2   | n.d. | 2.8     | n.d.     | n.d.   | n.d.      | 1.2       | n.d.    | 14.9    | 2.6     | n.d.     |
| 1       | 400       | 1300               | 56.4             | 3.1                    | 2.9    | 11.3   | 2.7  | 0.0       | 8.8    | 8.1    | 50.6   | 3.1  | n.d.   | 0.4    | 0.4    | 1.5  | 2.3   | n.d. | 2.0     | 0.6      | 0.1    | n.d.      | n.d.      | n.d.    | 1.4     | 0.8     | n.d.     |
| 1       | 600       | 1748               | 11.4             | 5.6                    | 0.9    | 2.8    | 3.5  | 3.9       | 15.1   | 8.0    | 33.9   | 3.1  | n.d.   | n.d.   | n.d.   | 1.3  | 0.2   | n.d. | 4.3     | 0.1      | n.d.   | 0.1       | n.d.      | n.d.    | 13.3    | 3.8     | n.d.     |
| 1       | 725       | 800                | 9.7              | 9.8                    | 1.0    | 1.9    | 9.6  | 8.7       | 6.1    | 13.2   | 16.2   | 1.5  | n.d.   | n.d.   | 0.3    | 0.3  | 2.1   | n.d. | n.d.    | n.d.     | 0.2    | n.d.      | 0.5       | n.d.    | 14.9    | 10.4    | 3.2      |
| 1       | 820       | 1571               | 3.3              | 12.3                   | 2.0    | 1.1    | 8.4  | 11.4      | 7.3    | 15.1   | 16.8   | 1.8  | n.d.   | n.d.   | 0.3    | 0.2  | 3.0   | n.d. | n.d.    | n.d.     | 0.1    | n.d.      | 0.5       | n.d.    | 9.3     | 9.4     | 1.2      |
| 1       | 1250      | 1374               | 0.8              | 32.4                   | 1.3    | 1.9    | 14.9 | 1.9       | 0.8    | 1.6    | 13.0   | 1.4  | n.d.   | n.d.   | 0.6    | 0.3  | 1.6   | n.d. | n.d.    | n.d.     | n.d.   | 0.2       | 0.5       | n.d.    | 21.0    | 6.3     | 0.3      |
| 2       | 3         | 1071               | 266.2            | 9.3                    | 18.9   | 35.7   | 6.8  | 4.8       | 1.4    | 8.6    | 6.2    | 0.1  | 0.2    | 1.4    | 0.8    | 0.2  | 2.5   | t.a. | n.d.    | 0.3      | 0.4    | t.a.      | 0.5       | 1.7     | 0.0     | n.d.    | n.d.     |
| 2       | 6         | 1166               | 349.6            | 30.1                   | 14.9   | 20.3   | 7.2  | 5.9       | 0.8    | 3.5    | 9.0    | 0.1  | t.a.   | 5.0    | 0.1    | 0.0  | 1.0   | n.d. | 0.1     | n.d.     | 0.4    | 0.1       | 1.4       | t.a.    | 0.0     | n.d.    | n.d.     |
| 2       | 55        | 1647               | 21.9             | 18.1                   | 17.5   | 12.4   | 3.7  | 26.5      | 2.8    | 8.9    | 3.6    | 0.1  | 0.2    | 0.4    | 0.3    | 0.3  | 3.4   | t.a. | t.a.    | n.d.     | 0.4    | 0.1       | t.a.      | n.d.    | 0.3     | n.d.    | n.d.     |
| 2       | 85        | 1435               | 160.0            | 24.3                   | 7.5    | 33.5   | 3.5  | 7.3       | 2.7    | 7.1    | 4.7    | 0.9  | t.a.   | 0.4    | 0.8    | 0.1  | 4.2   | t.a. | 0.6     | 0.6      | 0.3    | 0.5       | 0.3       | n.d.    | 0.6     | 0.2     | 0.0      |
| 2       | 115       | 1517               | 50.0             | 7.0                    | 6.6    | 18.2   | 5.0  | 7.4       | 5.8    | 9.1    | 21.9   | 2.0  | 1.6    | 0.9    | 1.8    | 0.3  | 6.2   | 0.1  | 1.5     | 0.3      | 0.3    | n.d.      | 1.1       | n.d.    | 2.1     | 1.0     | n.d.     |
| 2       | 200       | 193                | 6.0              | 80.0                   | 0.0    | 0.4    | 10.8 | 0.2       | 0.2    | 0.3    | 0.7    | 0.0  | n.d.   | n.d.   | n.d.   | n.d. | n.d.  | n.d. | n.d.    | n.d.     | n.d.   | 0.5       | n.d.      | n.d.    | 6.8     | 0.0     | n.d.     |
| 2       | 400       | 1725               | 12.6             | 4.2                    | 2.8    | 4.8    | 5.4  | 4.1       | 13.0   | 17.2   | 31.2   | 4.7  | 0.5    | n.d.   | 0.9    | n.d. | 1.6   | 0.5  | 3.9     | 1.9      | 0.1    | n.d.      | n.d.      | n.d.    | 1.7     | 0.7     | 1.0      |
| 2       | 600       | 1476               | 11.8             | 2.4                    | 0.0    | 12.5   | 2.1  | 1.9       | 0.1    | 1.9    | 34.1   | 11.3 | n.d.   | n.d.   | n.d.   | n.d. | 0.0   | 0.0  | n.d.    | 6.1      | n.d.   | n.d.      | n.d.      | n.d.    | 6.5     | 13.8    | 7.5      |
| 2       | 830       | 1397               | 7.2              | 6.2                    | 3.5    | 6.8    | 7.7  | 12.5      | 8.7    | 11.5   | 15.0   | 1.6  | 1.0    | 0.5    | 1.2    | 0.2  | 5.1   | 0.0  | 2.9     | 1.7      | 0.6    | n.d.      | 1.1       | n.d.    | 5.1     | 1.8     | 5.1      |
| 5       | 3         | 223                | 244.4            | 23.1                   | 16.1   | 18.4   | 24.6 | 3.8       | 0.8    | 4.1    | 4.6    | 0.1  | n.d.   | 1.2    | 1.1    | t.a. | 0.4   | n.d. | n.d.    | n.d.     | 0.1    | 0.8       | 0.5       | 0.1     | n.d.    | n.d.    | n.d.     |

|   |      |      |        |      |      |      |      |      |      |      |      |      |      |      |      |      |      |      |      |      |      |      |      |      |      |      |      |
|---|------|------|--------|------|------|------|------|------|------|------|------|------|------|------|------|------|------|------|------|------|------|------|------|------|------|------|------|
| 5 | 25   | 128  | 1187.6 | 66.1 | 1.0  | 4.1  | 22.9 | 0.0  | 0.2  | 0.4  | 4.5  | 0.0  | n.d. | n.d. | 0.0  | 0.2  | 0.2  | n.d. | n.d. | n.d. | 0.1  | 0.3  | n.d. | n.d. | n.d. | n.d. | n.d. |
| 5 | 35   | 1683 | 38.1   | 67.7 | 0.7  | 4.0  | 14.5 | 2.8  | 0.4  | 1.7  | 3.3  | 0.0  | n.d. | n.d. | 0.6  | n.d. | 0.2  | n.d. | t.a. | n.d. | 0.0  | 0.8  | n.d. | 1.0  | 2.2  | n.d. | n.d. |
| 5 | 75   | 995  | 174.8  | 20.5 | 11.0 | 49.3 | 2.9  | 0.2  | 0.3  | 0.9  | 8.6  | 1.8  | t.a. | 0.2  | 0.2  | t.a. | 0.3  | t.a. | 0.1  | 0.2  | 0.2  | 0.4  | n.d. | t.a. | 1.1  | 0.8  | 0.8  |
| 5 | 125  | 1289 | 2.3    | 3.9  | 6.7  | 35.3 | 5.6  | 9.3  | 3.6  | 2.8  | 3.6  | 0.8  | 0.2  | 0.2  | 1.8  | 0.2  | 5.6  | n.d. | 11.9 | 0.4  | 0.1  | 0.1  | n.d. | t.a. | 7.1  | n.d. | 0.8  |
| 5 | 250  | 1362 | 1.1    | 41.7 | 0.0  | 0.0  | 0.0  | 0.0  | 0.1  | 0.0  | 0.0  | 0.0  | n.d. | n.d. | n.d. | n.d. | n.d. | n.d. | n.d. | n.d. | n.d. | n.d. | n.d. | n.d. | 58.3 | n.d. | n.d. |
| 5 | 400  | 1365 | 11.2   | 5.4  | 2.8  | 5.0  | 7.7  | 3.4  | 11.8 | 11.3 | 33.0 | 3.4  | 0.4  | n.d. | 0.4  | 0.1  | 2.1  | 0.5  | 5.1  | 1.3  | 0.1  | n.d. | 0.3  | n.d. | 4.0  | 0.8  | 1.1  |
| 5 | 600  | 968  | 21.4   | 3.9  | 4.2  | 6.3  | 5.8  | 2.1  | 17.1 | 15.1 | 22.0 | 5.5  | 1.3  | 0.4  | 2.2  | 0.3  | 4.1  | 0.7  | 5.4  | 2.8  | 0.4  | n.d. | 0.7  | n.d. | 0.0  | n.d. | 0.0  |
| 5 | 830  | 1595 | 12.4   | 5.7  | 3.6  | 7.2  | 7.7  | 12.8 | 8.6  | 11.6 | 15.4 | 1.6  | 1.0  | 0.5  | 1.3  | 0.2  | 5.3  | 0.1  | 3.1  | 2.0  | 0.7  | n.d. | 1.2  | n.d. | 4.1  | 1.3  | 5.1  |
| 8 | 3    | 387  | 955.4  | 11.2 | 16.2 | 14.9 | 9.0  | 5.8  | 4.0  | 13.6 | 8.6  | 0.5  | t.a. | 2.4  | 1.1  | t.a. | 3.5  | 0.3  | 0.5  | 0.2  | 0.7  | 0.2  | 0.2  | 6.9  | 0.0  | n.d. | 0.0  |
| 8 | 10   | 309  | 1458.8 | 8.5  | 18.5 | 19.2 | 6.0  | 12.1 | 3.2  | 11.6 | 8.3  | 0.2  | 0.1  | 2.5  | 1.4  | 0.1  | 3.8  | 0.1  | t.a. | 0.1  | 1.1  | n.d. | 0.2  | 3.0  | 0.0  | n.d. | n.d. |
| 8 | 25   | 1648 | 348.7  | 13.2 | 22.2 | 11.6 | 6.8  | 12.9 | 3.9  | 9.5  | 8.2  | 0.0  | 0.1  | 1.4  | 1.0  | 0.6  | 3.7  | 0.1  | 0.1  | n.d. | t.a. | 0.1  | 1.3  | 3.2  | 0.0  | n.d. | n.d. |
| 8 | 50   | 887  | 474.4  | 18.0 | 18.3 | 18.4 | 5.7  | 10.2 | 5.3  | 11.3 | 3.1  | 0.2  | 0.1  | 0.3  | 1.1  | 0.6  | 3.2  | n.d. | n.d. | n.d. | 0.3  | 0.5  | 0.7  | 0.9  | 0.8  | 0.2  | 0.7  |
| 8 | 125  | 1231 | 54.2   | 9.8  | 1.9  | 1.7  | 4.4  | 14.1 | 8.5  | 15.8 | 6.5  | 0.9  | t.a. | 0.1  | 1.3  | 0.4  | 3.5  | t.a. | 1.9  | 0.8  | 0.2  | n.d. | 0.4  | 1.0  | 9.1  | 6.7  | 11.0 |
| 8 | 200  | 1698 | 3.8    | 41.1 | 0.2  | 0.3  | 14.5 | n.d. | t.a. | 0.3  | 1.8  | 1.0  | n.d. | n.d. | 0.1  | 0.3  | 0.7  | n.d. | n.d. | n.d. | 0.5  | n.d. | 0.3  | 1.1  | 22.3 | 0.4  | 15.0 |
| 8 | 350  | 1633 | 19.5   | 6.7  | 1.3  | 1.1  | 10.5 | 8.5  | 7.5  | 12.6 | 11.3 | 5.6  | 0.1  | n.d. | 2.3  | 0.5  | 7.2  | 0.2  | 6.0  | 4.3  | 0.1  | n.d. | 1.0  | 1.8  | 6.5  | 1.0  | 3.6  |
| 8 | 450  | 1440 | 1.5    | 24.2 | 0.0  | n.d. | 22.6 | 2.1  | 1.2  | 2.4  | 1.5  | 0.5  | n.d. | n.d. | 0.5  | 0.8  | 1.1  | n.d. | 1.1  | 3.2  | n.d. | n.d. | 0.3  | 2.4  | 22.8 | 0.9  | 12.7 |
| 8 | 550  | 1251 | 17.2   | 9.4  | 1.4  | 3.5  | 8.7  | 9.4  | 11.4 | 15.5 | 15.1 | 1.9  | 0.2  | n.d. | n.d. | 0.4  | 5.8  | 0.1  | 5.3  | 2.9  | 0.2  | n.d. | 0.7  | 0.6  | 4.0  | 1.4  | 2.1  |
| 8 | 650  | 1633 | 5.1    | 32.4 | n.d. | n.d. | 30.4 | 1.2  | 0.1  | 0.6  | 1.2  | 0.0  | n.d. | n.d. | n.d. | 1.3  | 1.0  | n.d. | n.d. | n.d. | n.d. | n.d. | n.d. | 1.6  | 19.5 | 0.1  | 10.5 |
| 8 | 750  | 1926 | 0.1    | 14.5 | n.d. | n.d. | 0.4  | n.d. | 0.1  | 0.1  | n.d. | n.d. | n.d. | n.d. | n.d. | n.d. | t.a. | n.d. | n.d. | n.d. | n.d. | n.d. | n.d. | n.d. | 61.2 | n.d. | 23.8 |
| 8 | 1000 | 1633 | 0.1    | 37.9 | n.d. | n.d. | 1.6  | n.d. | 0.1  | 0.1  | n.d. | n.d. | n.d. | n.d. | n.d. | n.d. | 0.1  | n.d. | n.d. | n.d. | n.d. | n.d. | n.d. | n.d. | 40.7 | n.d. | 19.8 |
| 8 | 1250 | 1417 | 0.1    | 47.3 | n.d. | n.d. | 0.6  | n.d. | 0.1  | 0.1  | n.d. | n.d. | n.d. | n.d. | n.d. | n.d. | t.a. | n.d. | n.d. | n.d. | n.d. | 0.1  | n.d. | 0.8  | 36.3 | 0.0  | 14.9 |

**Suppl. Table 2.** List of commercially available standards used to determine response factors of intact polar lipids (IPL) in this study.

For absolute quantification by HPLC-ion trap-MS the response factor was evaluated relative to the injection standard C19:0 PC-DAG.

For determining relative abundances of IPLs via HPLC-QTOF-MS (see methods in the main text), the absolute responses of the individual standards were used. For IPL abbreviations refer to main text.

| Short ID      | Full Name                                                         | Fatty acid distribution                       | Company                  | Used for IPL class (HPLC-ion trap-MS) | Used for IPL class (HPLC-QTOF-MS) |
|---------------|-------------------------------------------------------------------|-----------------------------------------------|--------------------------|---------------------------------------|-----------------------------------|
| 16:0 PE-DAG   | 1,2-dipalmitoyl-sn-glycero-3-phosphoethanolamine                  | 16:0/16:0                                     | Avanti Polar Lipids, USA | PE-DAG, PME-DAG, PDME-DAG             | PE-DAG                            |
| 16:0 PC-DAG   | 1,2-dipalmitoyl-sn-glycero-3-phosphocholine                       | 16:0/16:0                                     | Avanti Polar Lipids, USA | PC-DAG                                | PC-DAG                            |
| 19:0 PC-DAG   | 1,2-dinonadecanoyl-sn-glycero-3-phosphocholine                    | 19:0/19:0                                     | Avanti Polar Lipids, USA |                                       | internal standard for all IPLs    |
| 16:0 PME-DAG  | 1,2-dipalmitoyl-sn-glycero-3-phosphoethanolamine-N-methyl         | 16:0/16:0                                     | Avanti Polar Lipids, USA |                                       | PME-DAG                           |
| 16:0 PDME-DAG | 1,2-dipalmitoyl-sn-glycero-3-phosphoethanolamine-N,N-dimethyl     | 16:0/16:0                                     | Avanti Polar Lipids, USA |                                       | PDME-DAG                          |
| 16:0 PG-DAG   | 1,2-dipalmitoyl-sn-glycero-3-phospho-(1'-rac-glycerol)            | 16:0/16:0                                     | Avanti Polar Lipids, USA | PG-DAG, SQ-DAG, DPG                   | PG-DAG, SQ-DAG                    |
| 16:1 DPG      | 1',3'-bis(1,2-dipalmitoleoyl-sn-glycero-3-phospho)-glycerol       | 16:1/16:1/16:1/16:1                           | Avanti Polar Lipids, USA |                                       | DPG                               |
| 1Glc-DAG      | 1,2-diacyl-3-O-( $\alpha$ -D-glucopyranosyl)-sn-glycerol (E.coli) | 18:1/16:0, 18:1/16:1,<br>16:1/16:0, 18:1/18:1 | Avanti Polar Lipids, USA | 1G-DAG                                | 1G-DAG                            |
| 2G-DAG        | Digalactosyldiacylglycerol (plant, hydrogenated)                  | 18:0/18:0, 18:0/16:0                          | Avanti Polar Lipids, USA | 2G-DAG                                | 2G-DAG                            |
| DGTS          | 1,2-dipalmitoyl-sn-glycero-3-O-4'-[N,N,N-trimethyl]-homoserine    | 16:0/16:0                                     | Avanti Polar Lipids, USA | DGTS                                  | DGTS                              |
| C18 1G-CER    | D-galactosyl-b-1,1'-N-stearoyl-D-erythro-sphingosine              | d18:1/18:0                                    | Avanti Polar Lipids, USA | 1G-CER                                | 1G-CER                            |
| 1G-GDGT-PG    | Main phospholipid of <i>Thermoplasma acidophilum</i> (>95% pure)  |                                               | Matreya LLC, USA         | HPH-GDGT, 1G-GDGT, 2G-GDGT            | HPH-GDGT, 1G-GDGT, 2G-GDGT        |

**Suppl. Table 3.** Examples of HPLC-MS fragmentation patterns (MS2) in positive ionization mode for select major ions (MS1) of intact polar lipids (IPLs) detected in this study.

| IPL                         | MS1 (pos ion mode)<br>Select major ions (m/z)                               | MS2 (pos ion mode)<br>Neutral loss (Da)                 | MS2 (pos ion mode)<br>Select diagnostic ions (m/z) |
|-----------------------------|-----------------------------------------------------------------------------|---------------------------------------------------------|----------------------------------------------------|
| <b><i>Glycolipids</i></b>   |                                                                             |                                                         |                                                    |
| 1G-DAG                      | 766.546, 718.546, 716.531 [M+NH <sub>4</sub> ] <sup>+</sup>                 | Hexose plus NH <sub>3</sub> (179.079)                   | 335.258, 305.211, 313.277, 285.245                 |
| 1G-OH-DAG                   | 732.526, 730.510 [M+NH <sub>4</sub> ] <sup>+</sup>                          | Hexose plus NH <sub>3</sub> (179.079)                   | 313.277, 285.245                                   |
| 2G-DAG                      | 936.662, 934.646, 882.615, 880.599 [M+NH <sub>4</sub> ] <sup>+</sup>        | Two hexoses plus NH <sub>3</sub> (341.132)              | 339.291, 337.274, 313.277, 285.245                 |
| SQ-DAG                      | 812.555, 784.524, 782.508, 756.493 [M+H] <sup>+</sup>                       | Sulfoquinovosyl (261.052)                               | 313.277, 313.277, 311.258, 285.245                 |
| SQ-AEG                      | 824.592, 798.576 [M+H] <sup>+</sup>                                         | Sulfoquinovosyl (261.052)                               | 339.291                                            |
| 1G-CER                      | 748.572, 734.557 [M+H] <sup>+</sup>                                         | Hexose plus H <sub>2</sub> O (180.063)                  | 294.279 (LCB)                                      |
| 1G-OH-CER                   | 780.598, 766.583, 752.567 [M+H] <sup>+</sup>                                | Hexose plus H <sub>2</sub> O (180.063)                  | 294.279 (LCB)                                      |
| 1G-GDGT                     | 1481.402, 1471.324 [M+NH <sub>4</sub> ] <sup>+</sup>                        | Hexose plus NH <sub>3</sub> (179.079)                   | 1302.323, 1292.44                                  |
| 2G-GDGT                     | 1639.424 [M+NH <sub>4</sub> ] <sup>+</sup>                                  | Two hexoses plus NH <sub>3</sub> (341.132)              | 1298.291                                           |
| HPH-GDGT                    | 1723.421, 1713.343 [M+NH <sub>4</sub> ] <sup>+</sup>                        | Hexose plus NH <sub>3</sub> (179.079), hexose (162.053) | 1544.342, 1382.289, 1534.264, 1372.211             |
| <b><i>Phospholipids</i></b> |                                                                             |                                                         |                                                    |
| PE-DAG                      | 730.538, 718.538, 704.522, 678.507 [M+H] <sup>+</sup>                       | Phosphoethanolamine (141.019)                           | DAG fragments                                      |
| PE-AEG                      | 706.575, 702.543 [M+H] <sup>+</sup>                                         | Phosphoethanolamine (141.019)                           |                                                    |
| PC-DAG                      | 806.569, 780.554, 746.569, 706.538 [M+H] <sup>+</sup>                       | -                                                       | 184.073, DAG fragments                             |
| PC-AEG                      | 746.606 742.575, 716.559 [M+H] <sup>+</sup>                                 | -                                                       | 184.073                                            |
| PG-DAG                      | 766.559, 764.544, 762.528 [M+NH <sub>4</sub> ] <sup>+</sup>                 | Phosphoglycerol plus NH <sub>3</sub> (189.040)          | DAG fragments                                      |
| DPG                         | 1404.990, 1380.990, 1352.959, 1338.943<br>[M+NH <sub>4</sub> ] <sup>+</sup> | -                                                       | DAG fragments                                      |
| PME-DAG                     | 732.554, 718.538, 692.522 [M+H] <sup>+</sup>                                | Phosphomethylethanolamine (155.035)                     | DAG fragments                                      |
| PDME-DAG                    | 732.554, 730.538, 704.522 [M+H] <sup>+</sup>                                | Phosphodimethylethanolamine (169.050)                   | DAG fragments                                      |
| PI-DAG                      | 902.575, 900.560 [M+NH <sub>4</sub> ] <sup>+</sup>                          | Phosphoinositol plus NH <sub>3</sub> (277.056)          | DAG fragments                                      |

*Aminolipids*

|         |                                                       |   |                                                         |
|---------|-------------------------------------------------------|---|---------------------------------------------------------|
| DGTS    | 764.640, 760.609, 736.609, 732.577 [M+H] <sup>+</sup> | - | 498.382, 480.371, 474.382, 456.237, 236.149             |
| OH-DGTS | 754.619, 746.557 [M+H] <sup>+</sup>                   | - | 512.358, 494.351, 476.340, 496.366,<br>478.357, 236.149 |
| OL      | 693.614, 653.583 [M+H] <sup>+</sup>                   | - | 115.087                                                 |
| AL-I    | 842.650, 814.619, 742.619 [M+H] <sup>+</sup>          | - | 558.378, 514.409                                        |
| AL-II   | 800.603, 728.603, 700.572 [M+H] <sup>+</sup>          | - | 562.374, 544.365, 490.374, 472.364                      |

---

**Suppl. Table 4.** Absolute concentrations of pigments detected in surface waters of the Eastern Tropical North Pacific at stations 1, 5 and 8.

| Station | Depth (m) | Concentration (ng/L) |        |        |       |        |       |      |         |       |        |       |          |      |      |       |        |             |       |       |          |        |             |       |       |        |       |       |            |          |          |        |
|---------|-----------|----------------------|--------|--------|-------|--------|-------|------|---------|-------|--------|-------|----------|------|------|-------|--------|-------------|-------|-------|----------|--------|-------------|-------|-------|--------|-------|-------|------------|----------|----------|--------|
|         |           | MgDVP                | Chl c2 | Chl c1 | Per   | 19-But | Fuco  | Neo  | Prasino | Viola | 19-Hex | DD    | Cis-fuco | Allo | DT   | Zeax  | Lutein | Lutein Late | 8-Apo | Croco | DV Chl a | Chl a  | Chl c2 Like | a-Car | b-Car | Chl c3 | Chl b | c-MVP | Sum Ph-ide | Ph-ide 2 | Ph-ide 3 | Ph-tin |
| 1       | 3         | 2.64                 | 7.55   | 0.00   | 0.00  | 4.77   | 4.74  | 0.00 | 0.00    | 0.00  | 14.60  | 3.24  | 0.00     | 0.00 | 0.00 | 109.7 | 1.53   | 0.00        | 18.46 | 0.00  | 69.51    | 125.76 | 0.00        | 10.94 | 4.02  | 7.91   | 30.08 | 0.00  | 0.00       | 0.00     | 0.00     | 5.35   |
| 1       | 9         | 4.07                 | 3.91   | 0.00   | 0.00  | 5.69   | 4.95  | 0.00 | 0.00    | 0.00  | 15.94  | 3.79  | 0.00     | 0.00 | 0.00 | 136.6 | 1.05   | 3.97        | 15.21 | 0.00  | 74.43    | 123.91 | 0.00        | 13.97 | 6.14  | 4.08   | 28.25 | 0.00  | 0.00       | 0.00     | 0.00     | 6.61   |
| 1       | 16        | 4.84                 | 15.00  | 0.00   | 2.49  | 8.66   | 6.83  | 0.75 | 0.00    | 0.00  | 23.91  | 3.31  | 0.00     | 0.00 | 0.00 | 90.62 | 0.00   | 9.54        | 14.95 | 0.00  | 87.95    | 148.73 | 2.24        | 14.79 | 4.19  | 12.87  | 36.40 | 0.91  | 0.38       | 0.00     | 0.38     | 9.29   |
| 1       | 29        | 8.08                 | 32.27  | 0.00   | 1.75  | 16.59  | 38.92 | 1.17 | 1.58    | 0.53  | 42.64  | 4.18  | 0.00     | 1.47 | 0.00 | 60.07 | 0.00   | 1.59        | 17.28 | 3.23  | 91.55    | 293.10 | 2.80        | 47.24 | 3.23  | 43.08  | 136.8 | 0.00  | 55.53      | 10.81    | 44.72    | 23.40  |
| 1       | 51        | 25.23                | 20.58  | 11.20  | 0.00  | 6.46   | 8.73  | 0.85 | 3.49    | 0.00  | 15.57  | 1.14  | 0.00     | 1.41 | 0.00 | 37.65 | 0.00   | 0.00        | 17.22 | 4.03  | 132.9    | 148.47 | 6.44        | 105.9 | 0.00  | 14.95  | 238.3 | 2.70  | 68.71      | 14.21    | 54.50    | 35.86  |
| 1       | 71        | 17.78                | 102.6  | 0.00   | 0.00  | 15.65  | 246.1 | 0.00 | 0.00    | 63.51 | 63.10  | 14.01 | 10.36    | 0.00 | 0.00 | 19.87 | 0.00   | 0.00        | 18.67 | 4.29  | 21.58    | 931.31 | 16.29       | 103.0 | 17.00 | 276.1  | 79.45 | 15.18 | 333.2      | 79.38    | 253.8    | 101.6  |
| 5       | 0         | 0.00                 | 192.1  | 0.00   | 12.99 | 187.8  | 270.1 | 6.43 | 0.00    | 0.00  | 240.8  | 51.14 | 0.00     | 5.60 | 3.52 | 62.41 | 0.00   | 8.06        | 15.56 | 0.00  | 8.76     | 1352.2 | 15.66       | 5.56  | 14.05 | 152.7  | 100.1 | 14.63 | 52.93      | 10.79    | 42.14    | 33.16  |
| 5       | 25        | 6.79                 | 181.5  | 0.00   | 23.55 | 156.3  | 279.2 | 0.00 | 9.86    | 0.00  | 224.5  | 33.02 | 0.00     | 5.25 | 0.00 | 38.49 | 0.00   | 7.04        | 15.96 | 0.00  | 0.00     | 1319.5 | 9.27        | 0.00  | 12.44 | 184.3  | 81.11 | 17.59 | 73.68      | 0.00     | 73.68    | 54.97  |
| 5       | 30        | 5.13                 | 148.8  | 0.00   | 20.79 | 97.17  | 230.6 | 2.41 | 21.46   | 0.00  | 253.4  | 21.60 | 0.00     | 7.45 | 0.00 | 16.37 | 0.00   | 7.06        | 15.74 | 15.57 | 0.00     | 1234.4 | 7.25        | 8.25  | 9.26  | 206.5  | 95.88 | 26.30 | 128.5      | 35.16    | 93.40    | 58.44  |
| 5       | 50        | 4.82                 | 39.66  | 0.00   | 0.00  | 4.68   | 19.93 | 0.00 | 0.00    | 0.00  | 48.81  | 0.00  | 0.00     | 0.00 | 0.00 | 6.07  | 0.00   | 0.00        | 16.28 | 0.00  | 17.57    | 229.27 | 0.00        | 0.00  | 16.58 | 59.42  | 85.63 | 7.91  | 0.00       | 0.00     | 0.00     | 5.26   |
| 8       | 3         | 3.66                 | 10.30  | 0.00   | 3.92  | 14.61  | 13.04 | 1.97 | 0.00    | 0.00  | 48.72  | 10.54 | 0.00     | 0.00 | 0.36 | 78.80 | 1.56   | 1.97        | 12.95 | 0.03  | 39.71    | 229.12 | 3.18        | 10.15 | 6.56  | 8.44   | 42.99 | 1.70  | 11.39      | 10.84    | 0.55     | 8.17   |
| 8       | 8         | 3.63                 | 16.05  | 0.00   | 4.67  | 17.55  | 14.94 | 2.50 | 0.00    | 0.00  | 59.27  | 12.54 | 0.00     | 0.00 | 0.00 | 83.38 | 1.92   | 2.35        | 14.36 | 0.00  | 43.07    | 256.61 | 3.82        | 10.76 | 5.78  | 12.57  | 50.16 | 0.00  | 14.53      | 14.25    | 0.29     | 14.02  |
| 8       | 15        | 4.40                 | 18.75  | 0.00   | 4.43  | 18.17  | 15.02 | 2.45 | 0.00    | 0.00  | 59.63  | 11.33 | 0.00     | 0.00 | 0.05 | 82.00 | 1.91   | 2.28        | 15.11 | 0.00  | 45.50    | 249.58 | 3.88        | 10.53 | 4.98  | 16.99  | 51.01 | 2.54  | 14.66      | 12.49    | 2.17     | 10.26  |
| 8       | 22        | 3.55                 | 21.55  | 0.00   | 4.87  | 26.04  | 12.62 | 3.15 | 0.00    | 0.00  | 62.91  | 8.31  | 0.00     | 0.00 | 0.00 | 55.30 | 1.80   | 2.31        | 14.78 | 0.00  | 40.34    | 239.20 | 3.83        | 12.16 | 3.06  | 24.03  | 62.93 | 3.13  | 16.03      | 13.40    | 2.63     | 10.65  |
| 8       | 28        | 8.16                 | 34.03  | 1.20   | 6.15  | 39.75  | 15.38 | 4.55 | 1.98    | 0.00  | 81.30  | 7.41  | 0.00     | 8.13 | 0.00 | 132.0 | 3.21   | 2.78        | 15.05 | 3.23  | 104.3    | 325.87 | 3.53        | 40.16 | 3.58  | 36.93  | 135.7 | 4.95  | 23.00      | 16.64    | 6.36     | 20.17  |
| 8       | 36        | 9.75                 | 46.13  | 0.00   | 9.39  | 46.60  | 19.96 | 5.58 | 3.74    | 0.00  | 85.55  | 7.43  | 0.00     | 6.35 | 0.00 | 179.4 | 2.51   | 3.07        | 16.39 | 5.07  | 171.8    | 410.98 | 3.59        | 73.91 | 5.26  | 52.45  | 213.1 | 6.05  | 29.87      | 18.78    | 11.09    | 34.61  |
| 8       | 51        | 15.21                | 27.88  | 0.00   | 11.44 | 24.12  | 34.07 | 5.41 | 5.15    | 0.00  | 55.41  | 6.82  | 0.00     | 3.44 | 0.00 | 92.29 | 0.00   | 1.98        | 16.50 | 5.72  | 157.3    | 316.46 | 9.21        | 114.1 | 6.78  | 34.50  | 250.4 | 5.53  | 56.84      | 30.00    | 26.84    | 44.70  |
| 8       | 70        | 4.90                 | 9.97   | 0.00   | 2.89  | 6.10   | 7.30  | 0.80 | 0.37    | 0.00  | 26.00  | 1.61  | 0.00     | 1.69 | 0.00 | 7.67  | 0.00   | 0.96        | 15.45 | 1.48  | 18.44    | 117.73 | 0.00        | 18.98 | 0.00  | 13.62  | 61.13 | 3.72  | 7.39       | 3.96     | 3.43     | 6.78   |
| 8       | 0         | 10.84                | 37.93  | 0.00   | 8.34  | 19.02  | 10.52 | 2.97 | 0.00    | 0.00  | 70.72  | 9.44  | 0.00     | 0.00 | 0.00 | 115.4 | 3.21   | 2.95        | 14.47 | 0.00  | 68.20    | 280.17 | 4.31        | 19.80 | 7.23  | 62.74  | 66.98 | 2.75  | 13.96      | 3.60     | 10.35    | 6.93   |
| 8       | 8         | 8.71                 | 26.02  | 0.00   | 9.92  | 26.58  | 11.05 | 4.33 | 0.00    | 0.00  | 91.62  | 12.79 | 0.00     | 0.00 | 0.00 | 145.1 | 3.84   | 3.63        | 15.33 | 17.41 | 85.10    | 337.85 | 5.44        | 19.81 | 6.96  | 29.75  | 82.22 | 3.53  | 16.36      | 10.98    | 5.38     | 13.84  |
| 8       | 15        | 3.91                 | 16.41  | 0.00   | 6.50  | 23.06  | 9.86  | 3.50 | 0.00    | 0.00  | 77.40  | 10.31 | 0.00     | 1.00 | 0.00 | 92.79 | 1.66   | 3.03        | 15.80 | 0.36  | 59.86    | 277.69 | 4.32        | 15.46 | 5.37  | 17.11  | 70.49 | 2.77  | 18.44      | 18.44    | 0.00     | 13.64  |
| 8       | 22        | 4.94                 | 37.27  | 0.00   | 7.67  | 47.25  | 12.27 | 4.76 | 0.00    | 0.00  | 94.68  | 7.68  | 0.00     | 4.44 | 0.00 | 49.99 | 2.10   | 3.49        | 15.42 | 0.00  | 19.44    | 359.89 | 5.32        | 8.21  | 3.48  | 45.18  | 100.2 | 5.54  | 4.38       | 3.93     | 0.45     | 12.13  |
| 8       | 36        | 9.30                 | 31.81  | 0.00   | 6.37  | 60.45  | 32.80 | 4.85 | 2.32    | 0.00  | 62.93  | 6.48  | 0.00     | 2.79 | 0.00 | 47.77 | 0.00   | 2.61        | 14.82 | 0.14  | 59.68    | 365.47 | 3.08        | 27.08 | 2.72  | 43.56  | 131.7 | 5.68  | 7.47       | 5.87     | 1.60     | 16.81  |
| 8       | 51        | 11.20                | 28.60  | 0.00   | 2.88  | 23.59  | 38.55 | 4.25 | 4.48    | 0.00  | 37.61  | 4.76  | 0.00     | 2.40 | 0.00 | 71.85 | 0.00   | 1.53        | 17.44 | 4.84  | 147.4    | 278.60 | 8.48        | 138.1 | 0.00  | 34.34  | 270.8 | 4.81  | 45.38      | 16.85    | 28.53    | 45.95  |

**Suppl. Table 5.** Fatty acyl combinations (number of carbon atoms and double bond equivalents, DBE, in the alkyl side chains) of the major groups of intact polar lipids and their relative abundance at different depths within the water column of the Eastern Tropical North Pacific.

| IPL     | <i>m/z</i> (pos mode) | Carbon atoms | DBE | FA combination           | Rel. Abundance (%) |       |           |       |          |      |               |      |
|---------|-----------------------|--------------|-----|--------------------------|--------------------|-------|-----------|-------|----------|------|---------------|------|
|         |                       |              |     |                          | Oxic               |       | Upper OMZ |       | Core OMZ |      | Deep Oxycline |      |
|         |                       |              |     |                          | Mean               | SD    | Mean      | SD    | Mean     | SD   | Mean          | SD   |
| 1G-DAG  | 788.531               | 36           | 8   | 18:4/18:4                | 1.86               | 1.03  | 3.55      | 4.15  | 0.74     | 0.50 | 1.10          | 0.24 |
|         | 786.515               | 36           | 9   | 18:4/18:5                | 6.05               | 7.89  | 1.72      | 1.67  | 0.84     | 0.87 | 1.52          | 0.31 |
|         | 774.609               | 34           | 1   |                          | 2.69               | 1.99  | 1.48      | 1.36  | 2.59     | 1.93 | 2.96          | 1.06 |
|         | 766.546               | 34           | 5   |                          | 1.17               | 0.82  | 1.74      | 1.31  | 1.11     | 0.47 | 3.43          | 3.63 |
|         | 762.515               | 34           | 7   | 18:3/16:4                | 5.07               | 3.61  | 1.59      | 1.00  | 2.20     | 1.52 | 2.70          | 0.61 |
|         | 746.578               | 32           | 1   |                          | 3.82               | 5.24  | 3.59      | 2.09  | 4.53     | 1.78 | 4.54          | 0.71 |
|         | 732.562               | 31           | 1   |                          | 2.09               | 2.55  | 2.02      | 1.51  | 2.96     | 1.93 | 2.43          | 1.72 |
|         | 720.562               | 30           | 0   | 16:0/14:0                | 6.98               | 10.09 | 5.76      | 2.92  | 7.15     | 3.49 | 6.99          | 0.86 |
|         | 718.546               | 30           | 1   | 16:1/14:0                | 27.91              | 10.70 | 40.79     | 11.46 | 49.59    | 5.41 | 39.07         | 3.42 |
|         | 716.531               | 30           | 2   | 16:2/14:0                | 10.59              | 7.40  | 11.90     | 5.88  | 7.93     | 2.21 | 7.74          | 2.53 |
|         | 692.531               | 28           | 0   |                          | 4.79               | 2.82  | 2.97      | 1.30  | 4.48     | 1.18 | 3.71          | 1.20 |
| 690.515 | 28                    | 1            |     | 3.83                     | 2.61               | 4.54  | 2.48      | 3.18  | 1.18     | 2.45 | 1.35          |      |
| 2G-DAG  | 948.568               | 36           | 9   |                          | 2.11               | 1.62  | 1.18      | 1.35  | 0.41     | 0.50 | 4.10          | 6.60 |
|         | 936.662               | 34           | 1   | 18:1/16:0                | 5.27               | 2.43  | 4.50      | 4.54  | 13.94    | 1.86 | 11.00         | 5.92 |
|         | 934.646               | 34           | 2   | 18:2/16:0                | 6.68               | 2.86  | 2.87      | 2.77  | 7.43     | 3.02 | 9.11          | 4.42 |
|         | 932.631               | 34           | 3   | 18:3/16:0                | 4.94               | 1.71  | 2.45      | 1.91  | 2.95     | 1.75 | 4.93          | 1.89 |
|         | 930.615               | 34           | 4   |                          | 3.15               | 1.65  | 1.66      | 1.62  | 1.54     | 0.89 | 3.37          | 1.14 |
|         | 928.599               | 34           | 5   | 18:3/16:2                | 4.11               | 1.86  | 1.64      | 1.22  | 1.43     | 0.93 | 6.93          | 9.29 |
|         | 926.584               | 34           | 6   |                          | 3.12               | 1.66  | 1.61      | 1.56  | 1.36     | 0.91 | 2.28          | 1.57 |
|         | 924.568               | 34           | 7   | 18:3/16:4                | 4.90               | 2.40  | 1.73      | 1.78  | 1.20     | 0.80 | 2.75          | 0.39 |
|         | 908.631               | 32           | 1   | 18:1/14:0 ;<br>16:1/16:0 | 5.03               | 2.49  | 13.67     | 12.27 | 23.54    | 5.07 | 15.29         | 4.20 |
|         | 906.615               | 32           | 2   |                          | 2.20               | 0.92  | 3.52      | 4.42  | 2.89     | 1.71 | 3.42          | 0.84 |
|         | 902.584               | 32           | 4   | 18:4/14:0                | 5.45               | 2.91  | 1.14      | 2.07  | 0.78     | 0.68 | 0.76          | 0.94 |
|         | 900.568               | 32           | 5   | 18:5/14:0                | 4.76               | 2.10  | 4.25      | 13.38 | 0.17     | 0.49 | 0.63          | 1.27 |
|         | 898.552               | 32           | 6   |                          | 4.19               | 7.62  | 0.27      | 0.42  | 0.00     | 0.00 | 0.00          | 0.00 |
|         | 882.615               | 30           | 0   | 16:0/14:0                | 13.49              | 6.98  | 17.20     | 7.58  | 15.68    | 1.76 | 9.10          | 7.37 |
|         | 880.599               | 30           | 1   | 16:1/14:0                | 9.95               | 3.90  | 24.46     | 11.88 | 16.88    | 2.52 | 9.50          | 6.58 |
|         | 878.584               | 30           | 2   | 16:2/14:0                | 2.71               | 2.54  | 5.21      | 4.96  | 0.09     | 0.26 | 0.00          | 0.00 |
| 854.584 | 28                    | 0            |     | 3.82                     | 2.91               | 3.17  | 3.47      | 2.73  | 4.45     | 1.72 | 3.44          |      |
| SQ-DAG  | 838.571               | 34           | 1   | 18:1/16:0                | 1.97               | 1.08  | 2.83      | 3.36  | 4.98     | 4.57 | 8.52          | 7.97 |
|         | 836.555               | 34           | 2   |                          | 4.02               | 2.38  | 1.70      | 1.63  | 1.02     | 1.23 | 1.64          | 1.90 |



|        |         |    |    |                          |       |       |       |       |       |       |       |       |
|--------|---------|----|----|--------------------------|-------|-------|-------|-------|-------|-------|-------|-------|
|        | 834.540 | 34 | 3  |                          | 3.22  | 1.71  | 0.56  | 0.72  | 0.44  | 0.87  | 1.24  | 1.43  |
|        | 812.555 | 32 | 0  | 16:0/16:0 ;<br>15:0/14:0 | 9.15  | 3.10  | 4.46  | 3.78  | 9.29  | 4.07  | 12.60 | 3.12  |
|        | 810.540 | 32 | 1  | 16:1/16:0                | 7.29  | 2.63  | 11.61 | 6.09  | 12.53 | 2.50  | 10.36 | 4.74  |
|        | 808.524 | 32 | 2  | 16:1/16:1                | 5.23  | 3.07  | 11.49 | 7.09  | 6.69  | 3.79  | 5.43  | 4.34  |
|        | 784.524 | 30 | 0  | 16:0/14:0                | 26.72 | 5.24  | 24.93 | 16.07 | 30.45 | 3.33  | 30.89 | 3.33  |
|        | 782.508 | 30 | 1  | 16:1/14:0                | 15.90 | 6.46  | 31.16 | 11.93 | 13.75 | 4.21  | 12.69 | 4.69  |
|        | 780.493 | 30 | 2  | 16:2/14:0                | 4.95  | 3.47  | 2.81  | 4.28  | 7.29  | 11.51 | 0.47  | 0.54  |
|        | 756.493 | 28 | 0  | 14:0/14:0                | 16.24 | 6.46  | 6.84  | 5.26  | 13.57 | 11.15 | 13.66 | 9.59  |
| PG-DAG | 806.591 | 37 | 2  |                          | 1.59  | 2.88  | 1.88  | 2.51  | 3.07  | 1.23  | 2.63  | 1.39  |
|        | 792.575 | 36 | 2  | 18:1/18:1                | 9.81  | 5.61  | 7.12  | 3.44  | 9.78  | 3.67  | 7.69  | 0.25  |
|        | 780.575 | 35 | 1  |                          | 1.55  | 2.32  | 3.48  | 2.67  | 4.22  | 1.57  | 3.26  | 0.62  |
|        | 778.559 | 35 | 2  | 18:1/17:1 ;<br>19:1/16:1 | 3.26  | 2.46  | 10.69 | 6.95  | 13.26 | 2.11  | 11.05 | 0.62  |
|        | 766.559 | 34 | 1  | 18:1/16:0                | 12.32 | 2.78  | 8.63  | 8.75  | 7.21  | 2.63  | 7.00  | 0.45  |
|        | 764.544 | 34 | 2  | 18:2/16:0                | 21.87 | 10.62 | 18.84 | 8.87  | 19.50 | 4.17  | 25.57 | 4.49  |
|        | 762.528 | 34 | 3  | 18:3/16:0                | 15.03 | 9.19  | 2.67  | 3.22  | 3.78  | 1.34  | 3.78  | 0.32  |
|        | 752.544 | 33 | 1  | 17:1/15:0                | 7.52  | 4.63  | 13.03 | 5.80  | 16.60 | 2.27  | 14.65 | 3.77  |
|        | 738.528 | 32 | 1  | 16:1/16:0                | 11.41 | 4.41  | 11.43 | 5.08  | 10.84 | 3.29  | 10.11 | 1.45  |
|        | 736.512 | 32 | 2  | 16:1/16:1                | 13.19 | 3.79  | 19.08 | 12.58 | 9.77  | 2.20  | 10.42 | 0.80  |
|        | 710.497 | 30 | 1  |                          | 2.31  | 1.41  | 3.09  | 1.76  | 1.76  | 1.22  | 3.84  | 0.17  |
| PE-DAG | 730.538 | 32 | 2  | 18:1/17:1                | 12.02 | 9.37  | 19.53 | 13.16 | 23.32 | 7.97  | 19.51 | 11.03 |
|        | 718.538 | 34 | 1  | 18:1/16:0                | 7.28  | 6.14  | 6.44  | 7.72  | 11.29 | 5.49  | 9.85  | 6.57  |
|        | 716.522 | 34 | 2  | 18:1/16:1 ;<br>17:1/17:1 | 3.78  | 3.64  | 2.91  | 2.90  | 9.97  | 8.36  | 3.83  | 2.93  |
|        | 704.522 | 33 | 1  | 17:1/16:0                | 22.14 | 14.88 | 16.16 | 8.54  | 13.55 | 2.63  | 10.32 | 6.89  |
|        | 702.507 | 33 | 2  |                          | 1.32  | 1.33  | 1.79  | 2.25  | 2.05  | 1.35  | 4.12  | 5.50  |
|        | 690.507 | 32 | 1  | 16:1/16:0                | 6.93  | 10.80 | 5.53  | 7.05  | 7.11  | 4.76  | 8.29  | 10.09 |
|        | 688.491 | 32 | 2  |                          | 2.26  | 4.02  | 3.14  | 10.46 | 3.16  | 3.63  | 0.48  | 0.97  |
|        | 678.507 | 31 | 0  | 16:0/15:0                | 33.48 | 20.83 | 23.89 | 15.41 | 10.07 | 4.24  | 15.60 | 11.12 |
|        | 676.491 | 31 | 1  |                          | 3.82  | 3.31  | 2.83  | 2.43  | 3.07  | 1.10  | 1.66  | 1.85  |
|        | 674.476 | 31 | 2  |                          | 0.09  | 0.30  | 0.02  | 0.07  | 0.04  | 0.11  | 0.00  | 0.00  |
|        | 664.491 | 30 | 0  | 16:0/14:0                | 1.54  | 2.69  | 8.02  | 8.30  | 6.76  | 2.37  | 11.74 | 4.36  |
|        | 662.476 | 30 | 1  |                          | 1.57  | 1.44  | 2.74  | 5.83  | 1.92  | 1.77  | 2.72  | 4.35  |
|        | 650.476 | 29 | 0  | 15:0/14:0                | 2.61  | 2.09  | 6.66  | 5.43  | 6.50  | 3.55  | 10.94 | 8.75  |
|        | 648.460 | 29 | 1  |                          | 0.08  | 0.19  | 0.14  | 0.34  | 0.04  | 0.11  | 0.00  | 0.00  |
|        | 636.460 | 28 | 0  |                          | 1.08  | 1.54  | 0.21  | 0.49  | 1.17  | 0.88  | 0.95  | 1.44  |
| PC-DAG | 878.575 | 44 | 12 | 22:6/22:6                | 3.87  | 3.27  | 6.12  | 11.60 | 3.83  | 7.70  | 2.29  | 3.39  |
|        | 852.560 | 42 | 11 | 22:6/20:5                | 1.87  | 1.60  | 2.90  | 3.11  | 3.55  | 6.04  | 4.79  | 5.74  |
|        | 822.601 | 39 | 5  |                          | 1.59  | 1.12  | 1.50  | 1.49  | 0.67  | 0.93  | 1.47  | 1.35  |
|        | 806.569 | 38 | 6  | 22:6/16:0                | 20.28 | 7.02  | 19.69 | 16.84 | 13.97 | 11.29 | 36.10 | 36.79 |
|        | 788.616 | 36 | 1  |                          | 1.74  | 1.20  | 1.76  | 1.63  | 2.28  | 4.20  | 0.74  | 0.68  |

|      |         |    |   |                          |       |      |       |       |       |       |       |      |
|------|---------|----|---|--------------------------|-------|------|-------|-------|-------|-------|-------|------|
|      | 780.554 | 36 | 5 | 20:5/16:0                | 12.14 | 7.79 | 9.03  | 6.74  | 4.58  | 3.79  | 8.41  | 6.72 |
|      | 776.616 | 35 | 0 |                          | 0.49  | 0.66 | 1.09  | 1.23  | 0.59  | 0.58  | 0.71  | 0.77 |
|      | 774.601 | 35 | 1 |                          | 1.69  | 0.98 | 1.68  | 1.58  | 1.53  | 1.07  | 2.12  | 3.00 |
|      | 760.585 | 34 | 1 | 18:1/16:0                | 6.68  | 4.39 | 5.27  | 3.65  | 8.01  | 8.70  | 2.70  | 3.23 |
|      | 754.538 | 34 | 4 |                          | 2.73  | 1.57 | 1.86  | 2.02  | 0.76  | 0.66  | 1.15  | 1.10 |
|      | 748.585 | 33 | 0 |                          | 1.21  | 1.18 | 1.93  | 1.89  | 1.59  | 1.36  | 1.24  | 1.20 |
|      | 746.569 | 33 | 1 |                          | 1.85  | 3.95 | 3.18  | 3.63  | 3.88  | 2.12  | 2.66  | 2.43 |
|      | 744.554 | 33 | 2 | 17:1/16:1                | 0.91  | 1.03 | 1.97  | 1.68  | 5.96  | 6.54  | 2.33  | 1.39 |
|      | 734.569 | 32 | 0 | 16:0/16:0 ;<br>17:0/15:0 | 6.20  | 3.84 | 4.16  | 3.36  | 4.78  | 4.00  | 3.09  | 2.34 |
|      | 732.554 | 32 | 1 | 16:0/16:1                | 4.83  | 2.98 | 5.96  | 3.69  | 7.15  | 3.92  | 6.15  | 3.68 |
|      | 730.538 | 32 | 2 | 16:1/16:1                | 2.19  | 1.51 | 4.96  | 4.91  | 7.57  | 4.32  | 4.47  | 3.08 |
|      | 720.554 | 31 | 0 |                          | 1.86  | 1.32 | 2.86  | 3.45  | 2.09  | 1.43  | 1.61  | 1.59 |
|      | 718.538 | 31 | 1 |                          | 1.65  | 1.61 | 1.91  | 3.22  | 3.86  | 2.53  | 2.63  | 2.51 |
|      | 716.522 | 31 | 2 |                          | 0.91  | 1.01 | 0.87  | 1.10  | 4.55  | 5.76  | 0.97  | 0.89 |
|      | 706.538 | 30 | 0 | 16:0/14:0                | 9.35  | 2.79 | 5.68  | 4.00  | 3.29  | 1.87  | 2.53  | 2.65 |
|      | 704.522 | 30 | 1 | 16:1/14:0                | 4.89  | 4.78 | 3.71  | 2.41  | 4.62  | 2.79  | 2.75  | 2.62 |
|      | 702.507 | 30 | 2 |                          | 0.25  | 0.27 | 0.48  | 0.66  | 0.87  | 0.90  | 1.19  | 1.98 |
|      | 692.522 | 29 | 0 |                          | 2.13  | 1.68 | 3.21  | 2.35  | 2.26  | 1.52  | 1.67  | 1.99 |
|      | 690.507 | 29 | 1 |                          | 2.01  | 3.26 | 1.57  | 1.99  | 3.08  | 3.45  | 2.38  | 3.68 |
|      | 688.491 | 29 | 2 |                          | 0.45  | 0.64 | 0.76  | 2.63  | 1.57  | 2.59  | 0.10  | 0.21 |
|      | 678.507 | 28 | 0 | 14:0/14:0                | 6.22  | 3.39 | 5.89  | 4.62  | 3.09  | 1.68  | 3.76  | 3.82 |
| DGTS | 764.640 | 36 | 2 | 18:1/18:1                | 6.72  | 3.20 | 8.70  | 4.81  | 14.23 | 4.45  | 7.86  | 2.68 |
|      | 762.624 | 36 | 3 |                          | 3.66  | 1.56 | 2.53  | 0.76  | 1.43  | 0.64  | 3.14  | 0.91 |
|      | 760.609 | 36 | 4 | 18:2/18:2 ;<br>20:0/16:4 | 7.36  | 2.99 | 4.41  | 2.02  | 1.57  | 0.80  | 5.41  | 2.37 |
|      | 758.593 | 36 | 5 | 18:2/18:3                | 5.12  | 2.44 | 2.89  | 1.46  | 1.45  | 0.80  | 3.96  | 1.22 |
|      | 740.640 | 34 | 0 |                          | 1.11  | 0.39 | 2.65  | 1.48  | 4.93  | 1.81  | 1.98  | 1.10 |
|      | 738.624 | 34 | 1 | 18:1/16:0                | 3.90  | 1.70 | 14.87 | 13.30 | 32.49 | 12.73 | 14.69 | 2.83 |
|      | 736.609 | 34 | 2 | 18:2/16:0                | 7.44  | 3.95 | 6.57  | 1.85  | 8.60  | 0.91  | 8.33  | 2.26 |
|      | 734.593 | 34 | 3 | 18:3/16:0                | 5.04  | 2.11 | 2.84  | 1.05  | 1.14  | 0.59  | 3.33  | 0.85 |
|      | 732.577 | 34 | 4 |                          | 4.34  | 1.23 | 2.15  | 1.12  | 0.58  | 0.48  | 1.30  | 1.08 |
|      | 710.593 | 32 | 1 | 18:1/14:0                | 3.94  | 1.25 | 6.92  | 2.50  | 9.60  | 4.41  | 10.54 | 2.56 |
|      | 708.577 | 32 | 2 | 18:2/14:0                | 3.85  | 1.31 | 3.80  | 1.46  | 2.89  | 2.26  | 5.61  | 1.86 |
|      | 706.562 | 32 | 3 |                          | 2.65  | 0.83 | 2.07  | 1.25  | 0.74  | 0.41  | 3.05  | 2.00 |
|      | 698.593 | 31 | 0 |                          | 1.40  | 0.47 | 2.90  | 2.18  | 2.26  | 2.04  | 3.24  | 1.44 |
|      | 684.577 | 30 | 0 | 16:0/14:0                | 3.90  | 1.45 | 3.69  | 1.69  | 2.18  | 1.75  | 3.45  | 0.77 |
|      | 682.562 | 30 | 1 | 16:1/14:0                | 3.58  | 3.14 | 8.92  | 4.80  | 4.13  | 4.52  | 7.75  | 0.96 |
|      | 670.562 | 29 | 0 |                          | 3.60  | 1.39 | 3.47  | 1.93  | 2.14  | 1.62  | 2.34  | 0.76 |
|      | 656.546 | 28 | 0 | 14:0/14:0                | 9.56  | 4.74 | 6.54  | 3.47  | 4.44  | 2.18  | 4.81  | 0.46 |

**Suppl. Table 6.** Goodness of fit statistics for the NMDS analyses of normalized intact polar lipid (IPL) composition and quantitative microbial data (FISH), number of double bond equivalents (DBE) and carbon atoms in the alkyl side chains of IPLs.

| FISH Probe            | IPL (relative abundance) |       |      |       | Environmental parameter | Number of DBE |       |      |       | Environmental parameter | Number of carbon atoms |       |      |       |
|-----------------------|--------------------------|-------|------|-------|-------------------------|---------------|-------|------|-------|-------------------------|------------------------|-------|------|-------|
|                       | NMDS1                    | NMDS2 | r2   | p     |                         | NMDS1         | NMDS2 | r2   | p     |                         | NMDS1                  | NMDS2 | r2   | p     |
| Alphaproteobacteria   | -0.56                    | -0.83 | 0.02 | 0.613 | Depth                   | -0.80         | 0.59  | 0.12 | 0.081 | Depth                   | 0.48                   | 0.88  | 0.00 | 0.944 |
| Betaproteobacteria    | -0.60                    | -0.80 | 0.10 | 0.133 | POC                     | 0.93          | -0.35 | 0.19 | 0.019 | POC                     | -0.14                  | 0.99  | 0.05 | 0.340 |
| Gammaproteobacteria   | -0.66                    | -0.76 | 0.24 | 0.004 | TN                      | 0.95          | -0.30 | 0.20 | 0.012 | TN                      | -0.10                  | 1.00  | 0.56 | 0.324 |
| SRB                   | -0.42                    | -0.91 | 0.33 | 0.002 | Phosphate               | -0.90         | 0.44  | 0.12 | 0.740 | Phosphate               | 0.06                   | -1.00 | 0.03 | 0.531 |
| Epsilonproteobacteria | -0.88                    | -0.47 | 0.18 | 0.022 | Nitrate                 | -0.51         | 0.86  | 0.07 | 0.250 | Nitrate                 | 0.65                   | -0.76 | 0.34 | 0.472 |
| Nso                   | -0.94                    | -0.33 | 0.18 | 0.023 | Nitrite                 | -0.57         | -0.82 | 0.14 | 0.043 | Nitrite                 | -0.54                  | -0.84 | 0.15 | 0.052 |
| Anammox               | -0.04                    | -1.00 | 0.25 | 0.006 | Ammonium                | 0.67          | -0.75 | 0.06 | 0.311 | Ammonium                | -0.15                  | 0.99  | 0.05 | 0.339 |
| Planctomycetes        | -0.87                    | -0.50 | 0.13 | 0.730 | Salinity                | 0.96          | 0.29  | 0.00 | 0.909 | Salinity                | 0.94                   | 1.00  | 0.01 | 0.713 |
|                       |                          |       |      |       | Temperature             | 0.66          | -0.76 | 0.02 | 0.686 | Temperature             | -0.23                  | -0.97 | 0.01 | 0.882 |
|                       |                          |       |      |       | Fluorescence            | 0.97          | -0.26 | 0.27 | 0.003 | Fluorescence            | 0.04                   | 1.00  | 0.05 | 0.374 |
|                       |                          |       |      |       | Oxygen                  | 0.83          | -0.55 | 0.26 | 0.002 | Oxygen                  | -0.12                  | 0.99  | 0.09 | 0.138 |
|                       |                          |       |      |       | Chl-a                   | 0.96          | -0.27 | 0.28 | 0.002 | Chl-a                   | -0.01                  | 1.00  | 0.16 | 0.042 |

**Suppl. Figure 1.** Depth profiles of (a) total particulate nitrogen and (b) phaeophytin concentrations, at the investigated four stations in the ETNP.

**Suppl. Figure 2.** Structures of (a) bacterial/eukaryotic and (b) archaeal intact polar lipids (IPLs) observed in the ETNP. The position of the double bonds or rings and the OH-, epoxy- and keto-groups of the R' and R'' side chains were not determined.

**Suppl. Figure 3.** Extracted ion chromatograms of intact polar and core GDGTs showing the ring distribution within each individual compound class. Analyses were performed by HPLC-QTOF-MS with reversed phase chromatography as described in Zhu et al., (2016). Extracted ions for HPH-GDGTs were:  $m/z$  1723.421, 1721.406, 1719.390, 1717.374, 1715.359, 1713.343; for 2G-GDGT:  $m/z$  1643.455, 1641.439, 1639.424, 1637.408, 1635.392, 1633.377; for 1G-GDGT:  $m/z$  1481.402, 1479.386, 1477.371, 1475.355, 1473.339, 1471.324 and for core GDGTs:  $m/z$  1302.323, 1300.307, 1298.291, 1296.276, 1294.2, 1292.244. The numbers denote number of rings: 0 – GDGT-0, 1 – GDGT-1, 2 – GDGT-2, 5 – crenarchaeol.

**Suppl. Figure 4.** Identification of hydroxylated aminolipids and sphingolipids in water column samples of the ETNP. (a) HPLC-MS density map, full scan ( $MS^1$ ), in the mass range from  $m/z$  600 to 900 and retention time range from 7 to 9 minutes. Representative high-resolution accurate mass  $MS^2$  mass spectrum showing fragmentation patterns of (b) DGTS, (c) 1OH-DGTS, (d) 3OH-DGTS and (e) 1G-2OH-CER in positive ionization mode. Typical fragments for DGTS include monoacylglycerol side chains with the head group still attached. Similar fragmentation patterns are observed between DGTS, 1OH-

DGTS and 3OH-DGTS with exact masses pointing to additional hydroxyl-groups attached to the fatty acyl side chains. Note, that it's possible that the dihydroxylated fatty acid, could also be an epoxy-hydroxy or keto-hydroxy acid as only one loss of water was observed in the MS2 (from fragment  $m/z$  466.281 to  $m/z$  448.270). Multiple fatty acid side chain combinations are possible. Fragments of 1G-2OH-CER include the glycosidic head group loss of 180 Da and two hydroxyl-group losses as well as the long chain base (LCB),  $m/z$  294.279.

**Suppl. Figure 5.** Identification of aminolipids AL-I and AL-II and ester/ether-sulfoquinovosyl (SQ-AEG) in water column samples of the ETNP. (a) HPLC-MS density map, full scan ( $MS^1$ ), in the mass range from  $m/z$  600 to 900 and retention time range from 6.5 to 11.5 minutes. Representative high-resolution accurate mass  $MS^2$  mass spectrum showing fragmentation patterns of (b) AL-I and (c) AL-II in positive ionization mode. Fragmentation patterns of AL-I and AL-II are very similar to DGTS (Suppl. Fig. 3) showing monoacylglycerol fragments with the amino-head group still attached. The sum formula of the AL-I headgroup matches the head group of DGCC with an extra methyl group. However, since no head group fragments were observed no further structural inference could be made. The sum formula of AL-II matches exactly the head group of DGCC, however, the DGCC-characteristic head group ion fragment  $m/z$  252.144 was not observed and no structural inference from the detected head group fragments  $m/z$  132.102 and 104.107 could be made. Representative high-resolution accurate mass  $MS^2$  mass spectrum showing fragmentation patterns of (d) SQ-DAG and (e) SQ-AEG in positive and negative ionization mode. Both compound classes exhibit the sulfoquinovosyl-diagnostic head group loss of 261.05 Da. However, SQ-AEG only has one fatty acyl side chain fragment, whereas SQ-DAG has two fatty acyl fragments in

positive and negative ion mode. Furthermore, the exact mass of the parent ion and the fragments indicate that SQ-AEG has one oxygen less than SQ-DAG, indicating the replacement of one of the ester bonds with an ether bond.

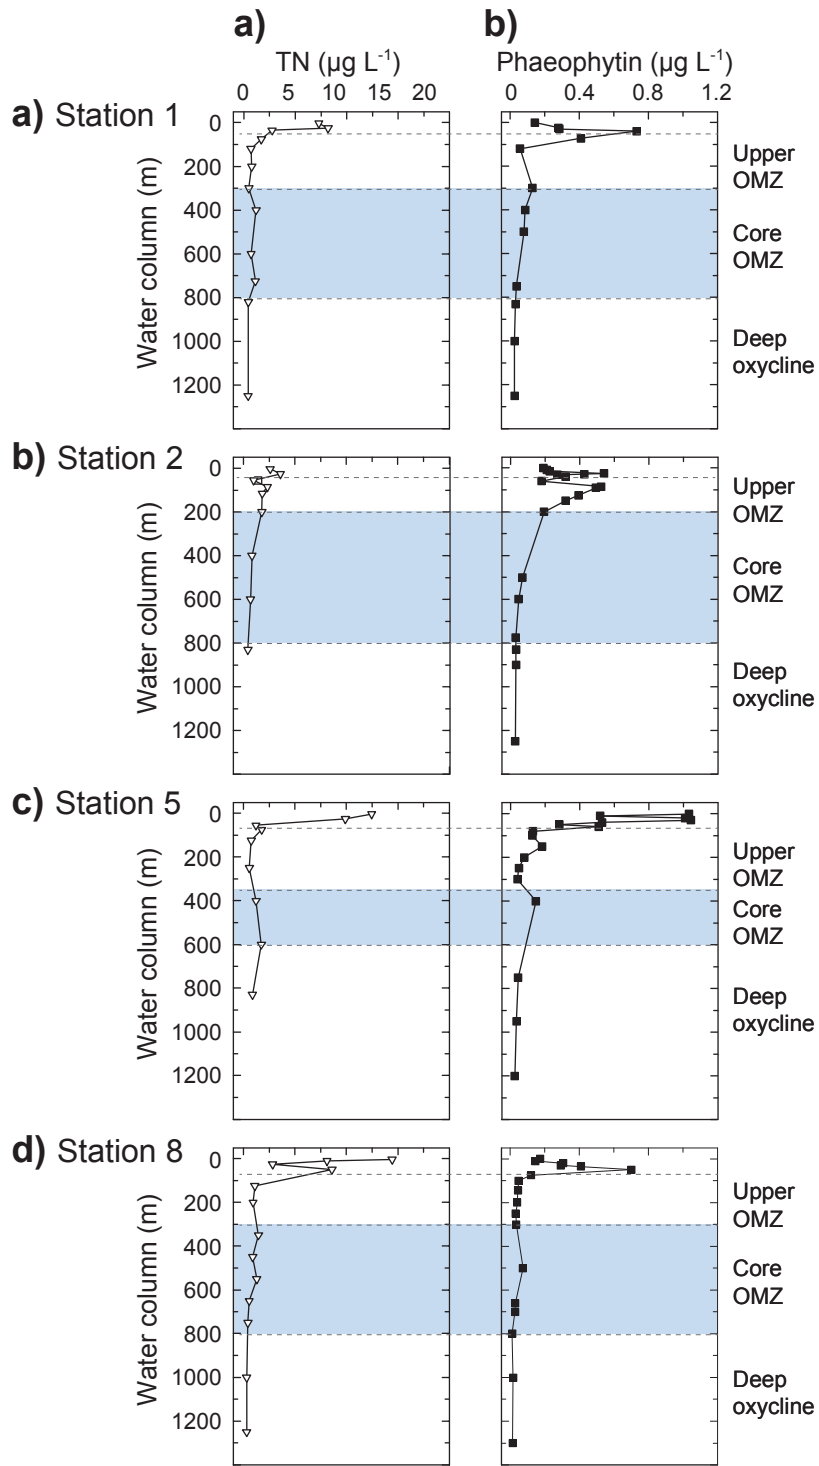

(a)

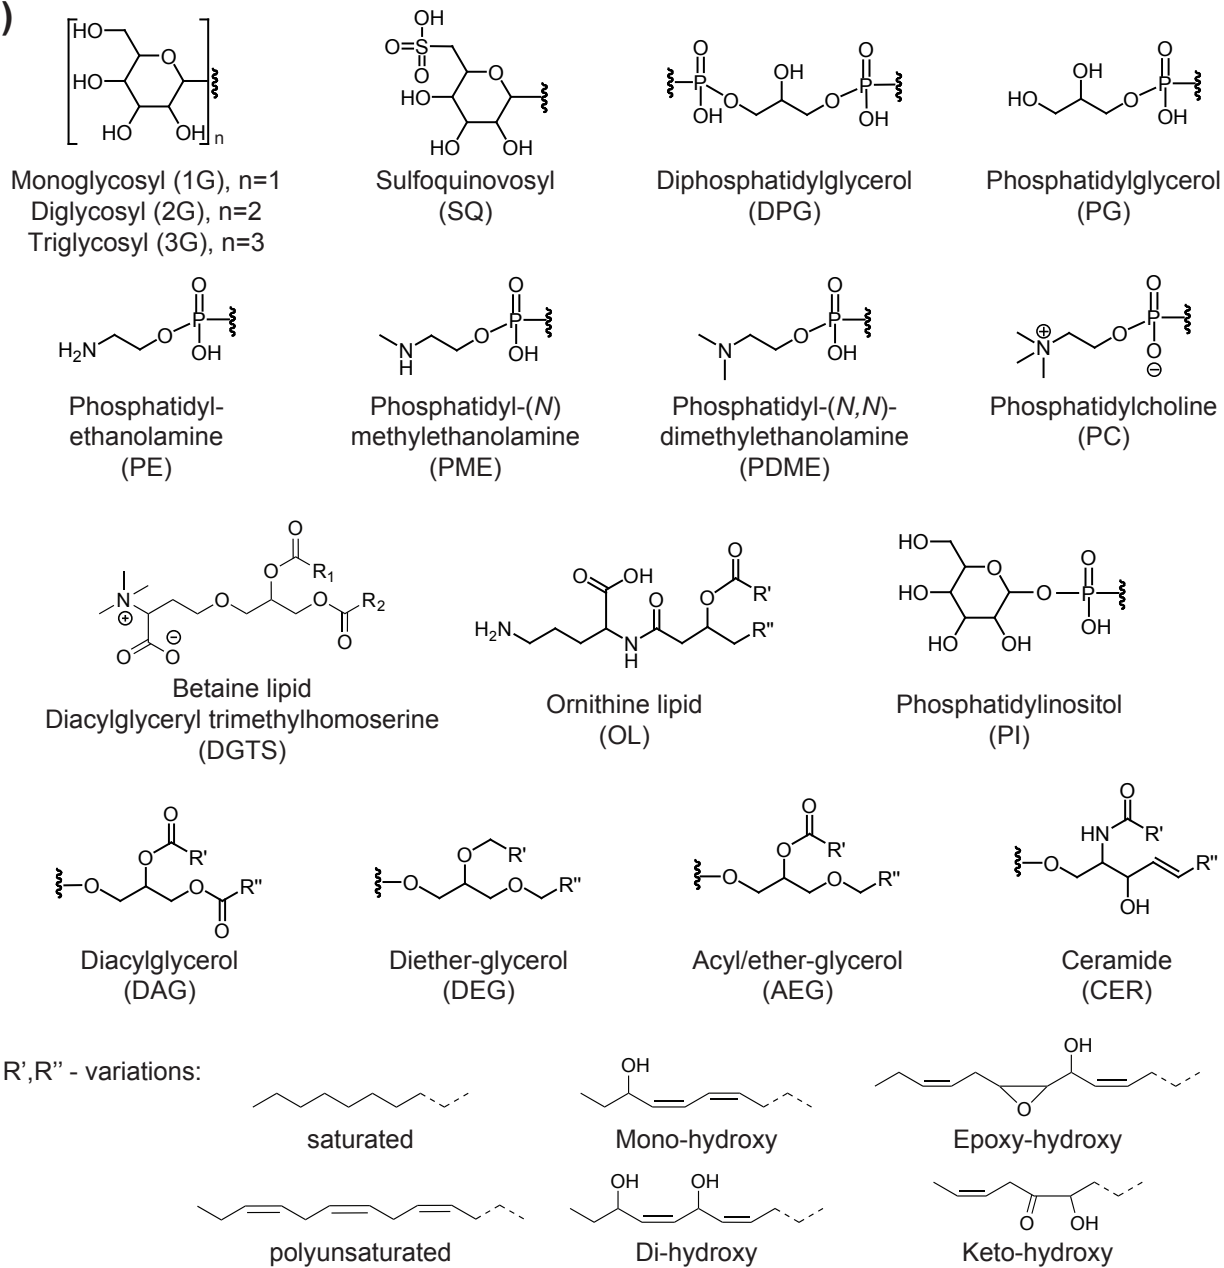

(b)

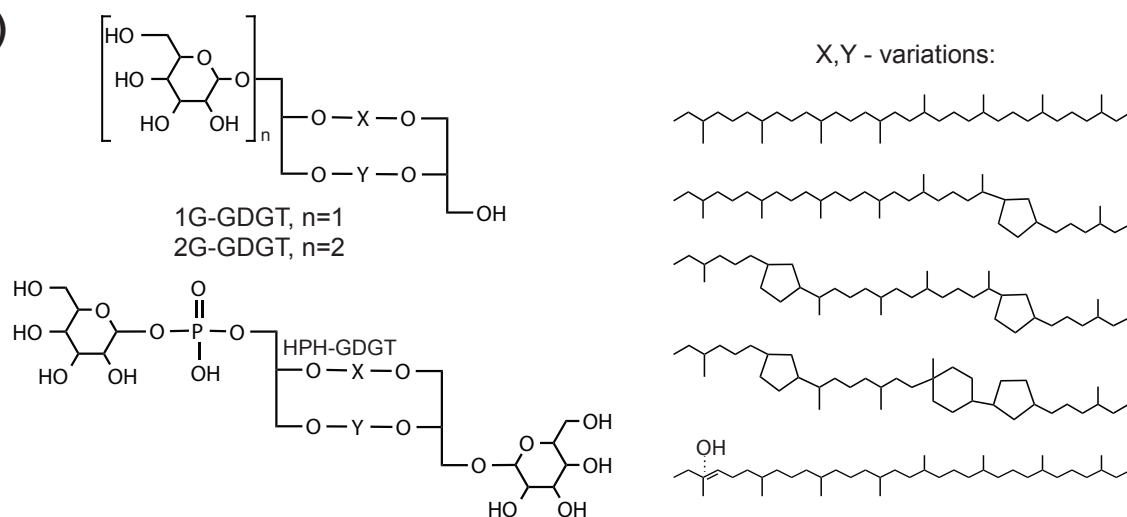



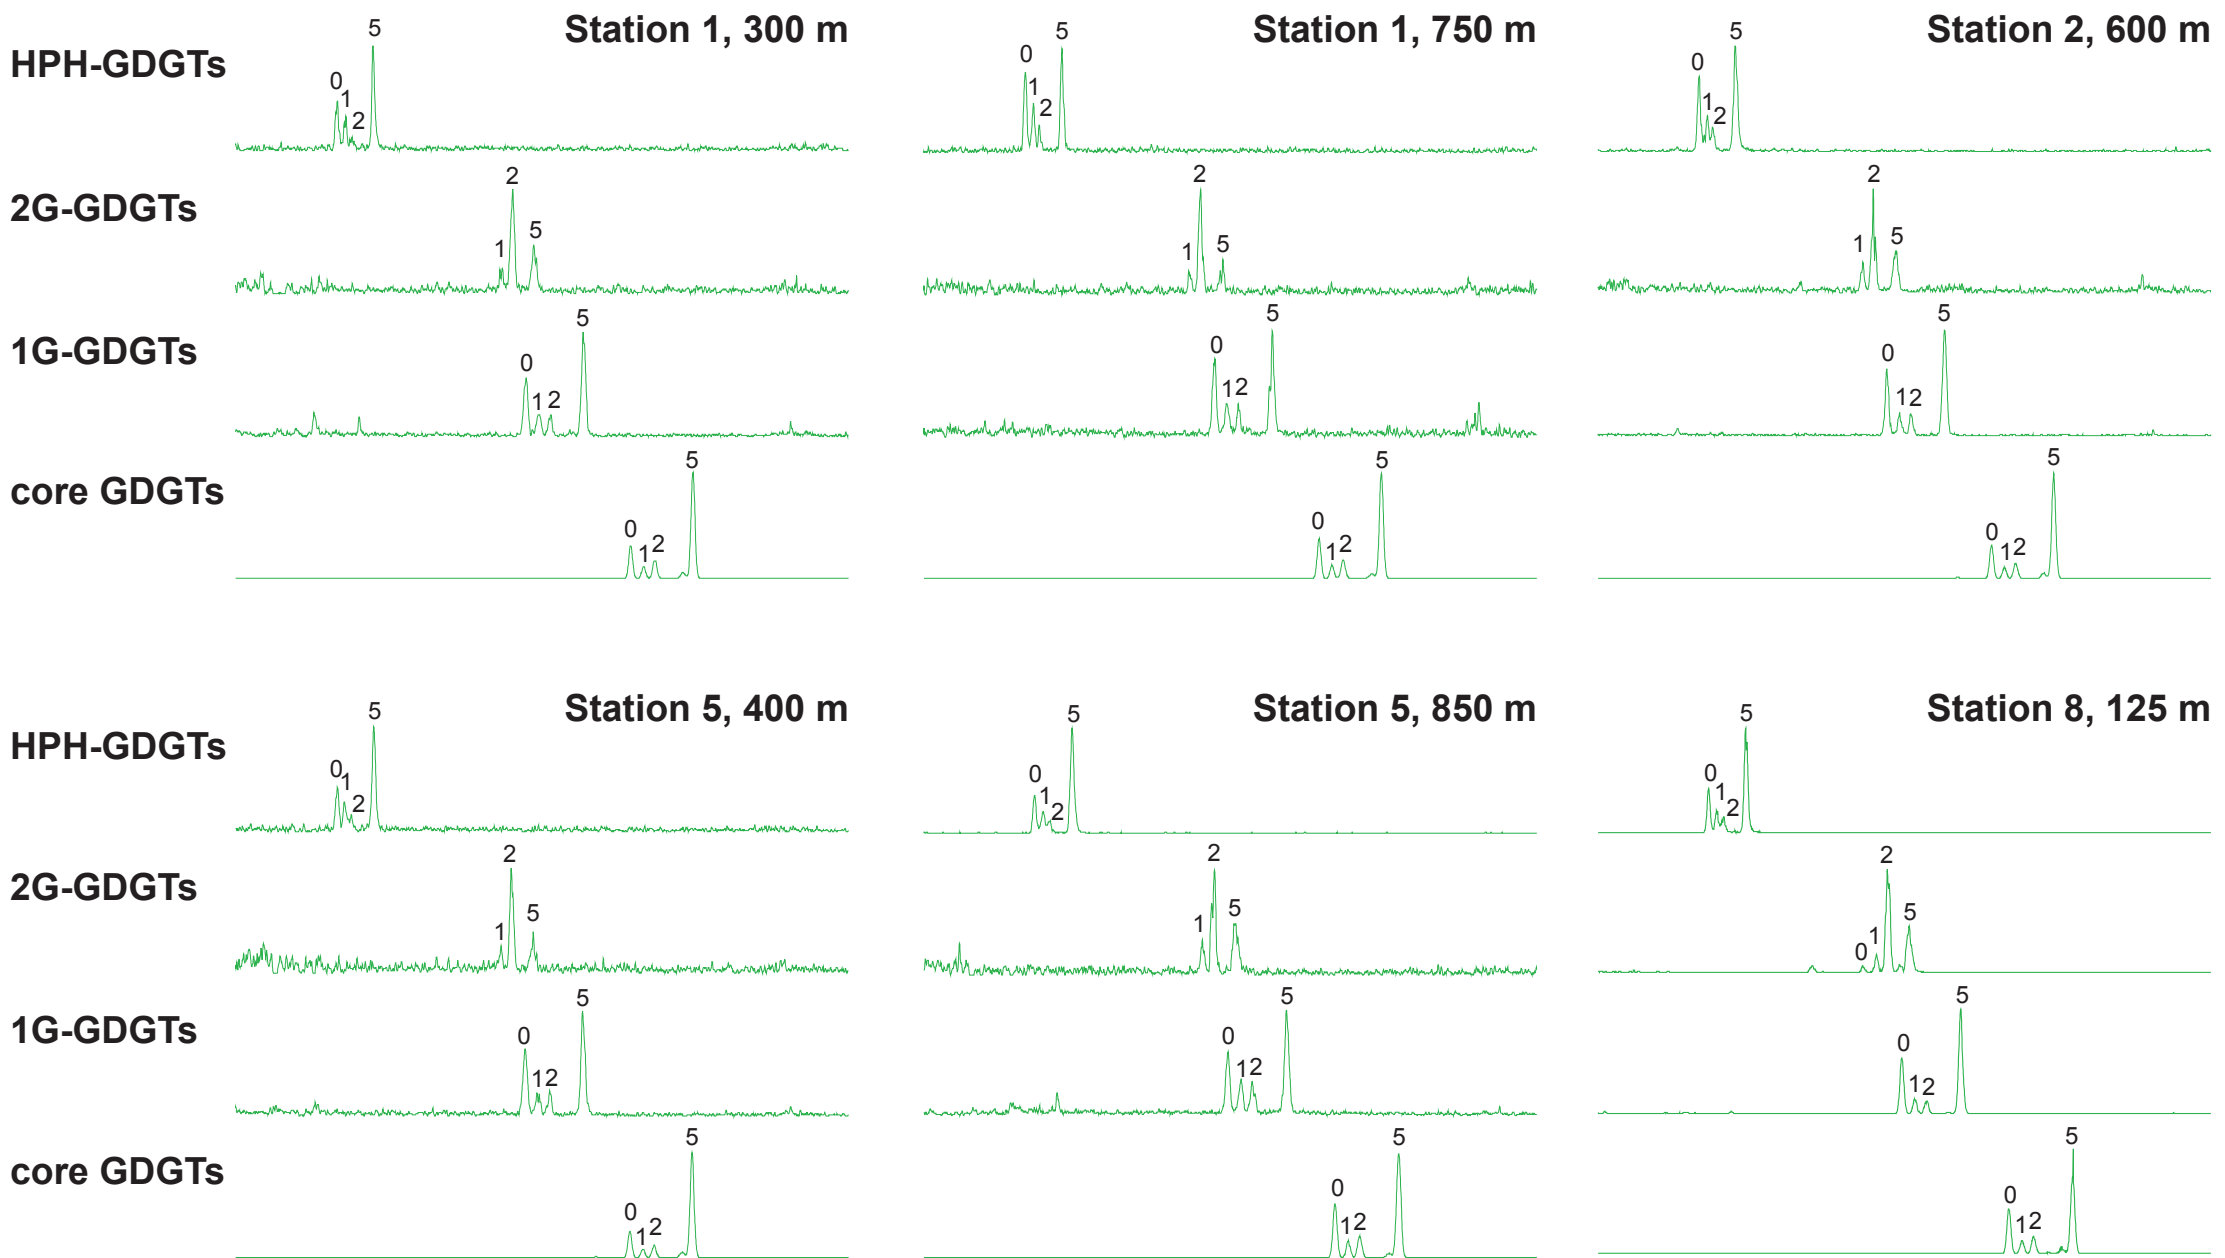

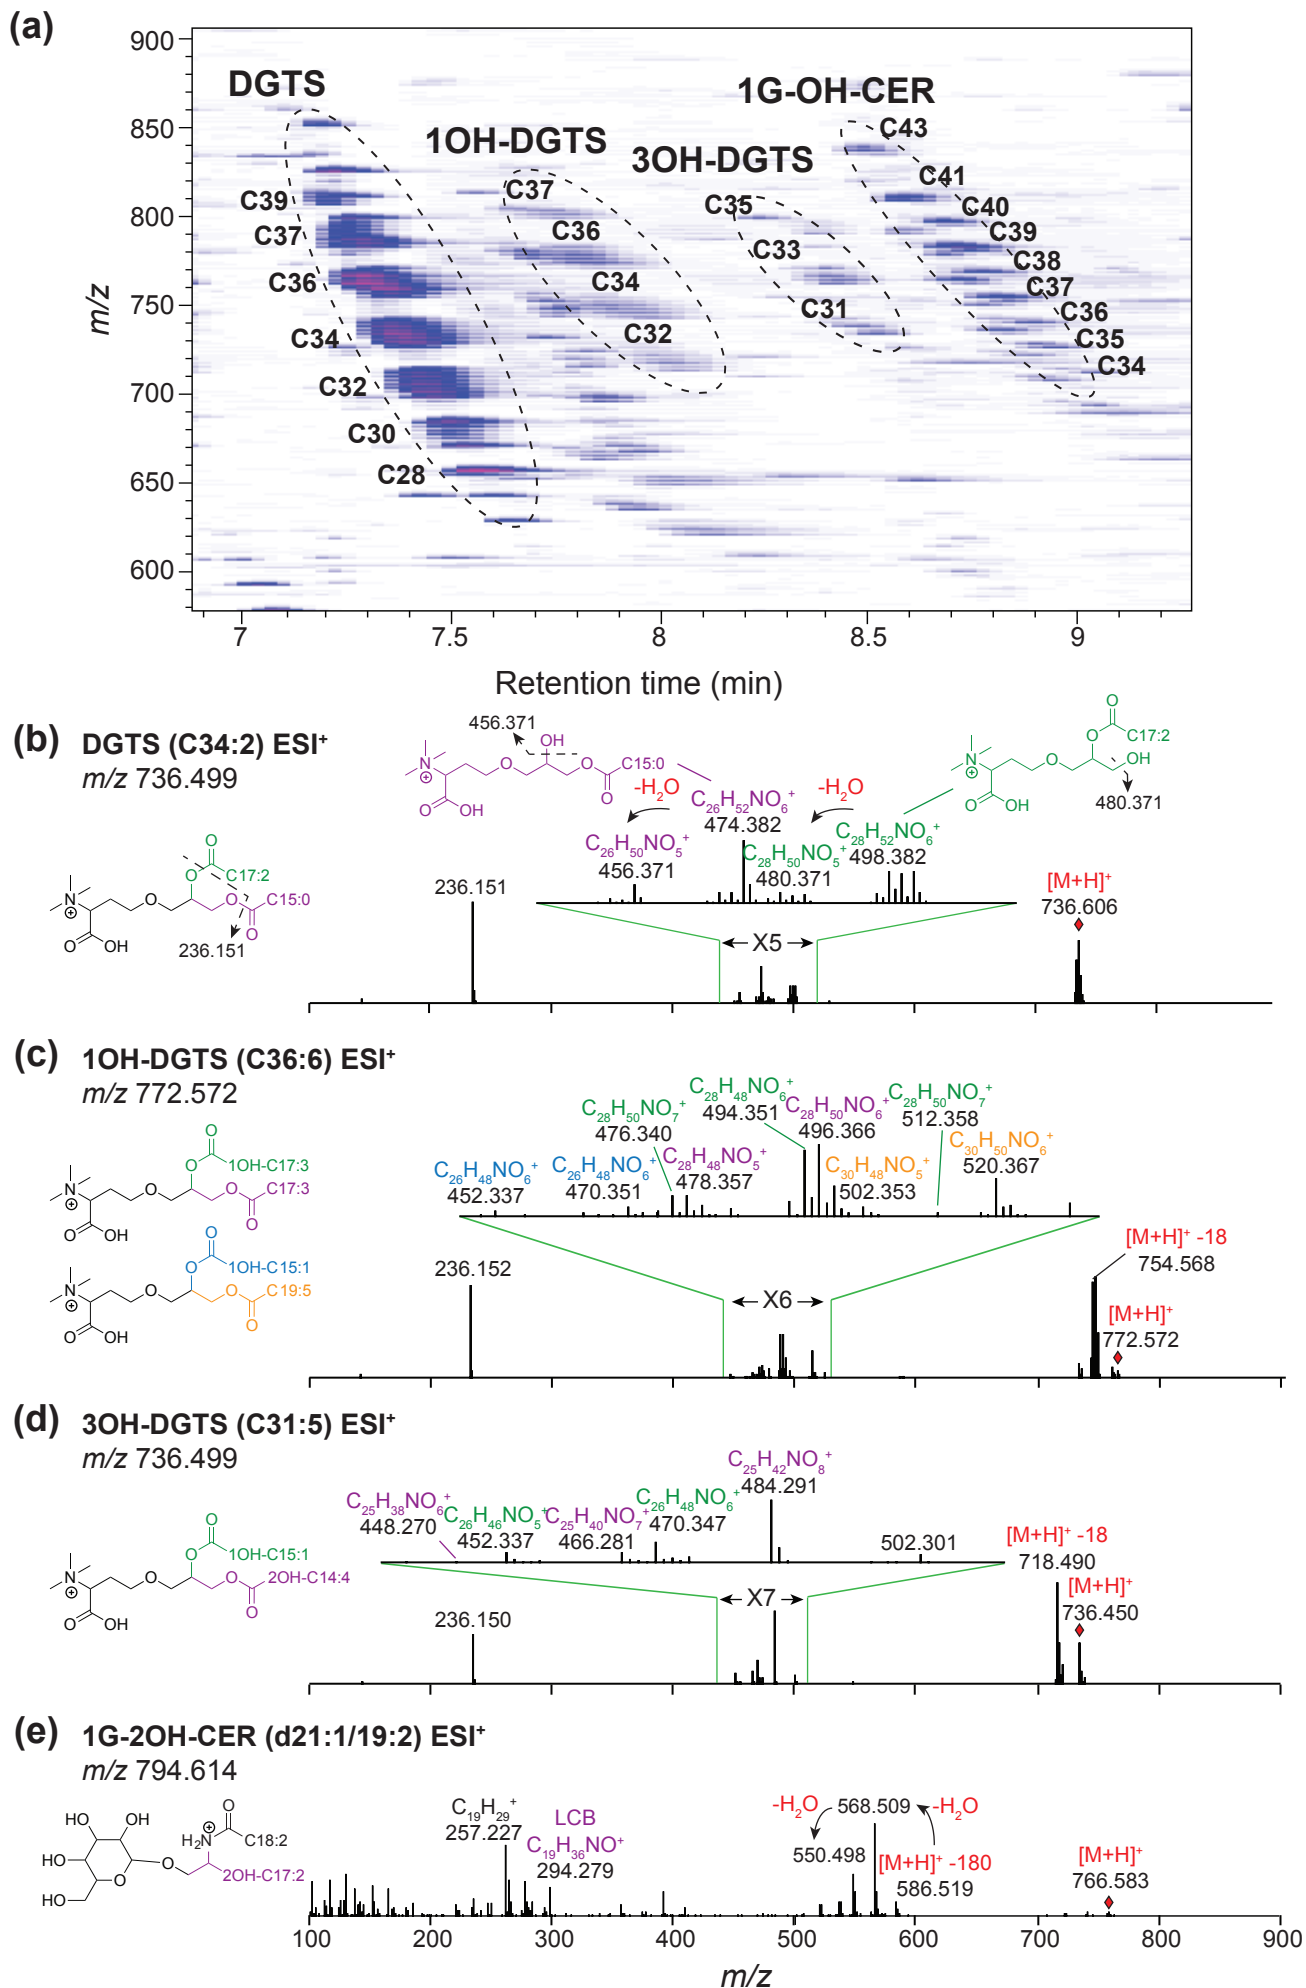

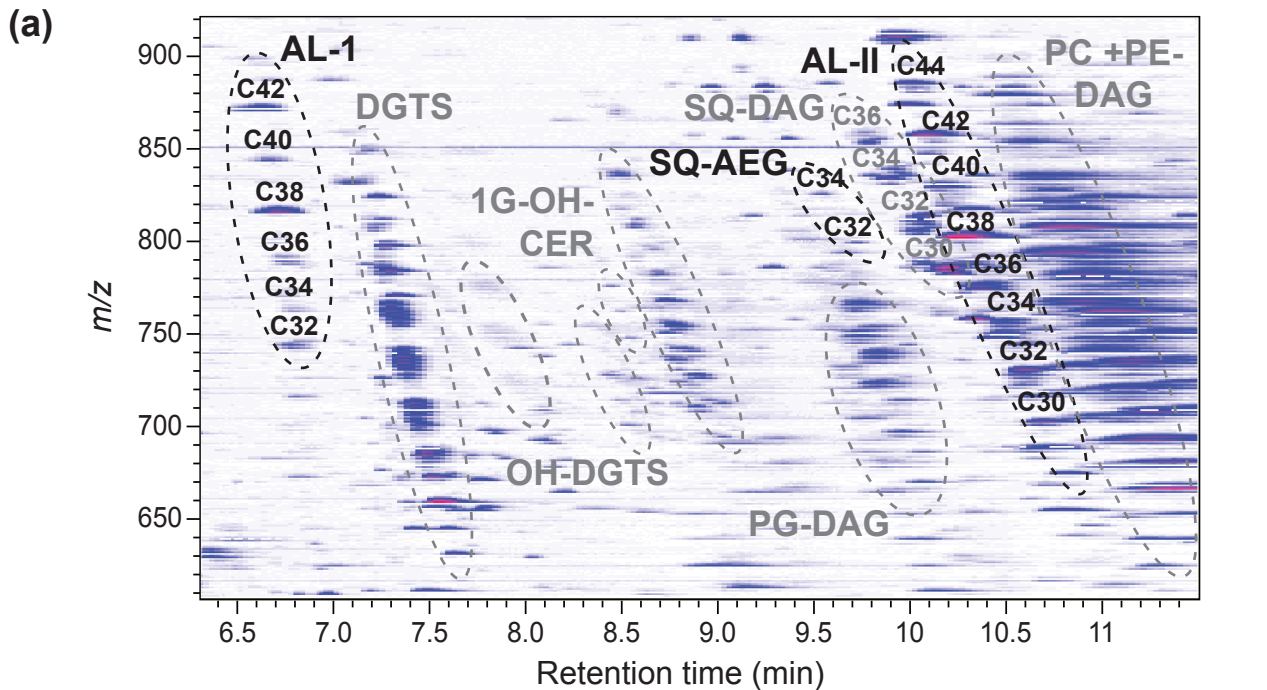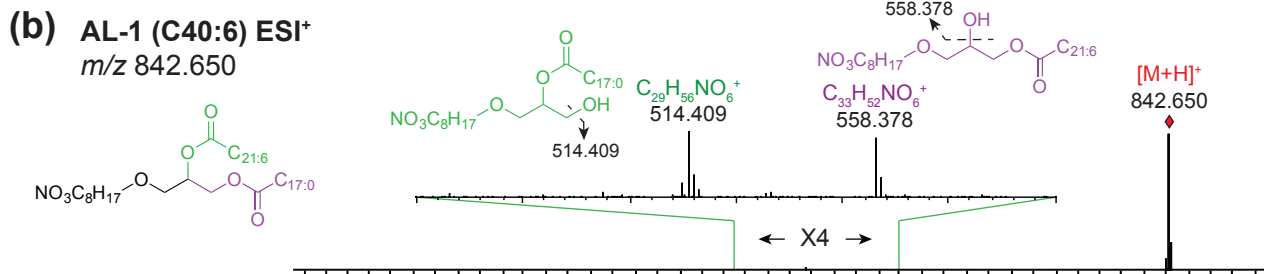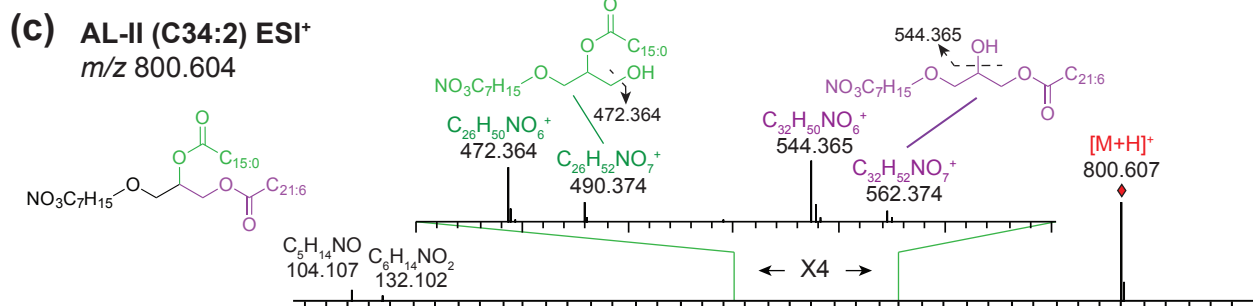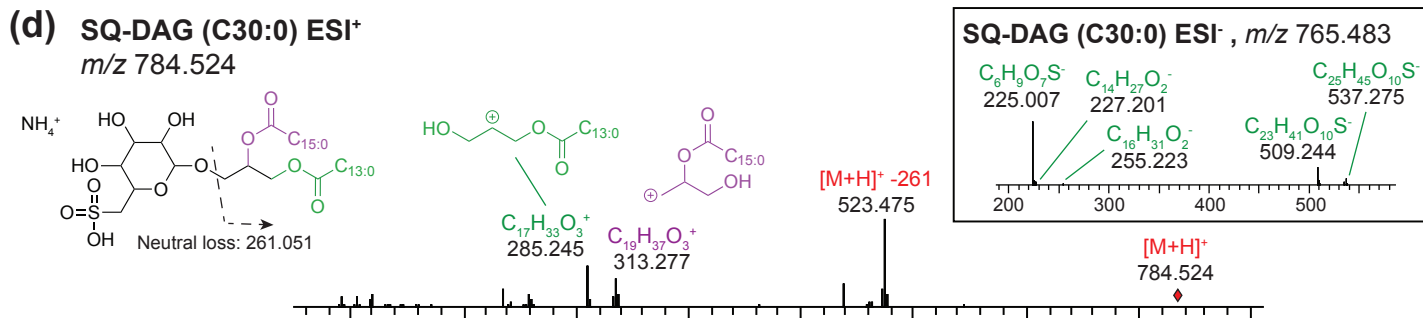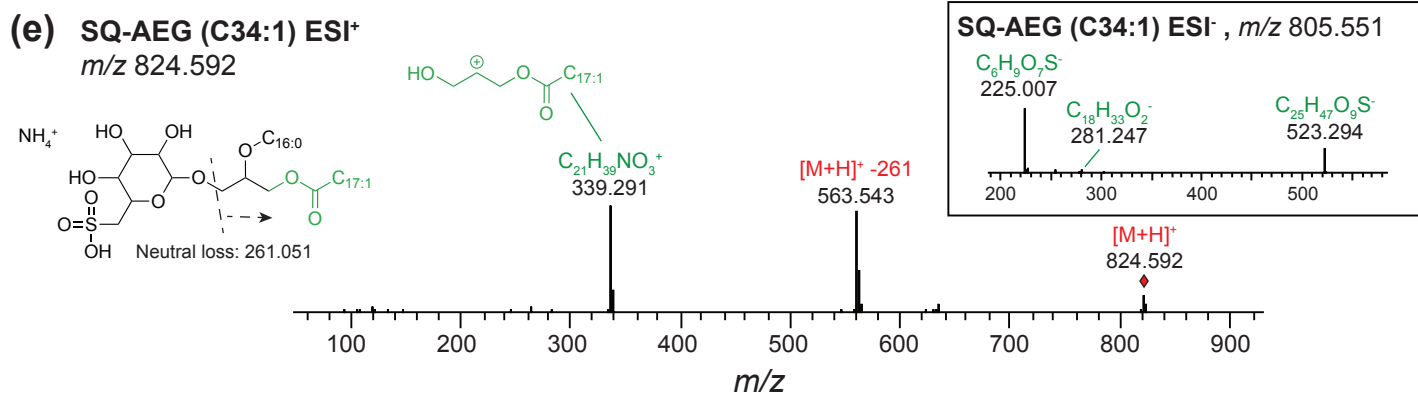

Supplement: Supplementary file [file bg-2018-119-AC5-supplement.pdf]
