# Supplementary material for: Diversity of intact polar lipids in the oxygen minimum zone of the Eastern Tropical North Pacific: Biogeochemical implications of non-phosphorus lipids
Source: Copernicus journal article supplement (doi:10.5194/bg-2018-119), 2018-03-13

**Diversity of intact polar lipids in the oxygen minimum zone of the Eastern Tropical North Pacific:**

**Biogeochemical implications of non-phosphorus lipids**

Florence Schubotz <sup>1\*</sup>, Sitan Xie <sup>1,¶</sup>, Julius S. Lipp <sup>1</sup>, Kai-Uwe Hinrichs <sup>1</sup>, Stuart G. Wakeham <sup>2</sup>

<sup>1</sup>MARUM Center for Marine Environmental Sciences and Department of Geosciences, University of Bremen, 28359 Bremen, Germany

<sup>2</sup>Skidaway Institute of Oceanography, Savannah, GA 31411, USA

<sup>¶</sup>Current address: Wai Gao Qiao Free Trade Zone, 200131 Shanghai, China

\*Corresponding author. MARUM, University of Bremen, Leobener Str. 13, Room 1070, 28359 Bremen, Germany. Tel: +49-421-218-65724. Fax: +49-421-218-65715. E-mail: schubotz@uni-bremen.

**Suppl. Table 1.** Absolute concentrations of pigments detected in surface waters of the Eastern Tropical North Pacific at stations 1, 5 and 8.

| Station | Depth (m) | Conc (ng/L) |        |        |       |        |       |      |         |       |        |       |          |      |      |       |        |             |       |       |          |        |             |       |       |        |       |       |            |          |          |        |
|---------|-----------|-------------|--------|--------|-------|--------|-------|------|---------|-------|--------|-------|----------|------|------|-------|--------|-------------|-------|-------|----------|--------|-------------|-------|-------|--------|-------|-------|------------|----------|----------|--------|
|         |           | MgDVP       | Chl c2 | Chl c1 | Per   | 19-But | Fuco  | Neo  | Prasino | Viola | 19-Hex | DD    | Cis-fuco | Allo | DT   | Zeax  | Lutein | Lutein Late | 8-Apo | Croco | DV Chl a | Chl a  | Chl c2 Like | a-Car | b-Car | Chl c3 | Chl b | c-MVP | Sum Ph-ide | Ph-ide 2 | Ph-ide 3 | Ph-tin |
| 1       | 3         | 2.64        | 7.55   | 0.00   | 0.00  | 4.77   | 4.74  | 0.00 | 0.00    | 0.00  | 14.60  | 3.24  | 0.00     | 0.00 | 0.00 | 109.7 | 1.53   | 0.00        | 18.46 | 0.00  | 69.51    | 125.76 | 0.00        | 10.94 | 4.02  | 7.91   | 30.08 | 0.00  | 0.00       | 0.00     | 0.00     | 5.35   |
| 1       | 9         | 4.07        | 3.91   | 0.00   | 0.00  | 5.69   | 4.95  | 0.00 | 0.00    | 0.00  | 15.94  | 3.79  | 0.00     | 0.00 | 0.00 | 136.6 | 1.05   | 3.97        | 15.21 | 0.00  | 74.43    | 123.91 | 0.00        | 13.97 | 6.14  | 4.08   | 28.25 | 0.00  | 0.00       | 0.00     | 0.00     | 6.61   |
| 1       | 16        | 4.84        | 15.00  | 0.00   | 2.49  | 8.66   | 6.83  | 0.75 | 0.00    | 0.00  | 23.91  | 3.31  | 0.00     | 0.00 | 0.00 | 90.62 | 0.00   | 9.54        | 14.95 | 0.00  | 87.95    | 148.73 | 2.24        | 14.79 | 4.19  | 12.87  | 36.40 | 0.91  | 0.38       | 0.00     | 0.38     | 9.29   |
| 1       | 29        | 8.08        | 32.27  | 0.00   | 1.75  | 16.59  | 38.92 | 1.17 | 1.58    | 0.53  | 42.64  | 4.18  | 0.00     | 1.47 | 0.00 | 60.07 | 0.00   | 1.59        | 17.28 | 3.23  | 91.55    | 293.10 | 2.80        | 47.24 | 3.23  | 43.08  | 136.8 | 0.00  | 55.53      | 10.81    | 44.72    | 23.40  |
| 1       | 51        | 25.23       | 20.58  | 11.20  | 0.00  | 6.46   | 8.73  | 0.85 | 3.49    | 0.00  | 15.57  | 1.14  | 0.00     | 1.41 | 0.00 | 37.65 | 0.00   | 0.00        | 17.22 | 4.03  | 132.9    | 148.47 | 6.44        | 105.9 | 0.00  | 14.95  | 238.3 | 2.70  | 68.71      | 14.21    | 54.50    | 35.86  |
| 1       | 71        | 17.78       | 102.6  | 0.00   | 0.00  | 15.65  | 246.1 | 0.00 | 0.00    | 63.51 | 63.10  | 14.01 | 10.36    | 0.00 | 0.00 | 19.87 | 0.00   | 0.00        | 18.67 | 4.29  | 21.58    | 931.31 | 16.29       | 103.0 | 17.00 | 276.1  | 79.45 | 15.18 | 333.2      | 79.38    | 253.8    | 101.6  |
| 5       | 0         | 0.00        | 192.1  | 0.00   | 12.99 | 187.8  | 270.1 | 6.43 | 0.00    | 0.00  | 240.8  | 51.14 | 0.00     | 5.60 | 3.52 | 62.41 | 0.00   | 8.06        | 15.56 | 0.00  | 8.76     | 1352.2 | 15.66       | 5.56  | 14.05 | 152.7  | 100.1 | 14.63 | 52.93      | 10.79    | 42.14    | 33.16  |
| 5       | 25        | 6.79        | 181.5  | 0.00   | 23.55 | 156.3  | 279.2 | 0.00 | 9.86    | 0.00  | 224.5  | 33.02 | 0.00     | 5.25 | 0.00 | 38.49 | 0.00   | 7.04        | 15.96 | 0.00  | 0.00     | 1319.5 | 9.27        | 0.00  | 12.44 | 184.3  | 81.11 | 17.59 | 73.68      | 0.00     | 73.68    | 54.97  |
| 5       | 30        | 5.13        | 148.8  | 0.00   | 20.79 | 97.17  | 230.6 | 2.41 | 21.46   | 0.00  | 253.4  | 21.60 | 0.00     | 7.45 | 0.00 | 16.37 | 0.00   | 7.06        | 15.74 | 15.57 | 0.00     | 1234.4 | 7.25        | 8.25  | 9.26  | 206.5  | 95.88 | 26.30 | 128.5      | 35.16    | 93.40    | 58.44  |
| 5       | 50        | 4.82        | 39.66  | 0.00   | 0.00  | 4.68   | 19.93 | 0.00 | 0.00    | 0.00  | 48.81  | 0.00  | 0.00     | 0.00 | 0.00 | 6.07  | 0.00   | 0.00        | 16.28 | 0.00  | 17.57    | 229.27 | 0.00        | 0.00  | 16.58 | 59.42  | 85.63 | 7.91  | 0.00       | 0.00     | 0.00     | 5.26   |
| 8       | 3         | 3.66        | 10.30  | 0.00   | 3.92  | 14.61  | 13.04 | 1.97 | 0.00    | 0.00  | 48.72  | 10.54 | 0.00     | 0.00 | 0.36 | 78.80 | 1.56   | 1.97        | 12.95 | 0.03  | 39.71    | 229.12 | 3.18        | 10.15 | 6.56  | 8.44   | 42.99 | 1.70  | 11.39      | 10.84    | 0.55     | 8.17   |
| 8       | 8         | 3.63        | 16.05  | 0.00   | 4.67  | 17.55  | 14.94 | 2.50 | 0.00    | 0.00  | 59.27  | 12.54 | 0.00     | 0.00 | 0.00 | 83.38 | 1.92   | 2.35        | 14.36 | 0.00  | 43.07    | 256.61 | 3.82        | 10.76 | 5.78  | 12.57  | 50.16 | 0.00  | 14.53      | 14.25    | 0.29     | 14.02  |
| 8       | 15        | 4.40        | 18.75  | 0.00   | 4.43  | 18.17  | 15.02 | 2.45 | 0.00    | 0.00  | 59.63  | 11.33 | 0.00     | 0.00 | 0.05 | 82.00 | 1.91   | 2.28        | 15.11 | 0.00  | 45.50    | 249.58 | 3.88        | 10.53 | 4.98  | 16.99  | 51.01 | 2.54  | 14.66      | 12.49    | 2.17     | 10.26  |
| 8       | 22        | 3.55        | 21.55  | 0.00   | 4.87  | 26.04  | 12.62 | 3.15 | 0.00    | 0.00  | 62.91  | 8.31  | 0.00     | 0.00 | 0.00 | 55.30 | 1.80   | 2.31        | 14.78 | 0.00  | 40.34    | 239.20 | 3.83        | 12.16 | 3.06  | 24.03  | 62.93 | 3.13  | 16.03      | 13.40    | 2.63     | 10.65  |
| 8       | 28        | 8.16        | 34.03  | 1.20   | 6.15  | 39.75  | 15.38 | 4.55 | 1.98    | 0.00  | 81.30  | 7.41  | 0.00     | 8.13 | 0.00 | 132.0 | 3.21   | 2.78        | 15.05 | 3.23  | 104.3    | 325.87 | 3.53        | 40.16 | 3.58  | 36.93  | 135.7 | 4.95  | 23.00      | 16.64    | 6.36     | 20.17  |
| 8       | 36        | 9.75        | 46.13  | 0.00   | 9.39  | 46.60  | 19.96 | 5.58 | 3.74    | 0.00  | 85.55  | 7.43  | 0.00     | 6.35 | 0.00 | 179.4 | 2.51   | 3.07        | 16.39 | 5.07  | 171.8    | 410.98 | 3.59        | 73.91 | 5.26  | 52.45  | 213.1 | 6.05  | 29.87      | 18.78    | 11.09    | 34.61  |
| 8       | 51        | 15.21       | 27.88  | 0.00   | 11.44 | 24.12  | 34.07 | 5.41 | 5.15    | 0.00  | 55.41  | 6.82  | 0.00     | 3.44 | 0.00 | 92.29 | 0.00   | 1.98        | 16.50 | 5.72  | 157.3    | 316.46 | 9.21        | 114.1 | 6.78  | 34.50  | 250.4 | 5.53  | 56.84      | 30.00    | 26.84    | 44.70  |
| 8       | 70        | 4.90        | 9.97   | 0.00   | 2.89  | 6.10   | 7.30  | 0.80 | 0.37    | 0.00  | 26.00  | 1.61  | 0.00     | 1.69 | 0.00 | 7.67  | 0.00   | 0.96        | 15.45 | 1.48  | 18.44    | 117.73 | 0.00        | 18.98 | 0.00  | 13.62  | 61.13 | 3.72  | 7.39       | 3.96     | 3.43     | 6.78   |
| 8       | 0         | 10.84       | 37.93  | 0.00   | 8.34  | 19.02  | 10.52 | 2.97 | 0.00    | 0.00  | 70.72  | 9.44  | 0.00     | 0.00 | 0.00 | 115.4 | 3.21   | 2.95        | 14.47 | 0.00  | 68.20    | 280.17 | 4.31        | 19.80 | 7.23  | 62.74  | 66.98 | 2.75  | 13.96      | 3.60     | 10.35    | 6.93   |
| 8       | 8         | 8.71        | 26.02  | 0.00   | 9.92  | 26.58  | 11.05 | 4.33 | 0.00    | 0.00  | 91.62  | 12.79 | 0.00     | 0.00 | 0.00 | 145.1 | 3.84   | 3.63        | 15.33 | 17.41 | 85.10    | 337.85 | 5.44        | 19.81 | 6.96  | 29.75  | 82.22 | 3.53  | 16.36      | 10.98    | 5.38     | 13.84  |
| 8       | 15        | 3.91        | 16.41  | 0.00   | 6.50  | 23.06  | 9.86  | 3.50 | 0.00    | 0.00  | 77.40  | 10.31 | 0.00     | 1.00 | 0.00 | 92.79 | 1.66   | 3.03        | 15.80 | 0.36  | 59.86    | 277.69 | 4.32        | 15.46 | 5.37  | 17.11  | 70.49 | 2.77  | 18.44      | 18.44    | 0.00     | 13.64  |
| 8       | 22        | 4.94        | 37.27  | 0.00   | 7.67  | 47.25  | 12.27 | 4.76 | 0.00    | 0.00  | 94.68  | 7.68  | 0.00     | 4.44 | 0.00 | 49.99 | 2.10   | 3.49        | 15.42 | 0.00  | 19.44    | 359.89 | 5.32        | 8.21  | 3.48  | 45.18  | 100.2 | 5.54  | 4.38       | 3.93     | 0.45     | 12.13  |
| 8       | 36        | 9.30        | 31.81  | 0.00   | 6.37  | 60.45  | 32.80 | 4.85 | 2.32    | 0.00  | 62.93  | 6.48  | 0.00     | 2.79 | 0.00 | 47.77 | 0.00   | 2.61        | 14.82 | 0.14  | 59.68    | 365.47 | 3.08        | 27.08 | 2.72  | 43.56  | 131.7 | 5.68  | 7.47       | 5.87     | 1.60     | 16.81  |
| 8       | 51        | 11.20       | 28.60  | 0.00   | 2.88  | 23.59  | 38.55 | 4.25 | 4.48    | 0.00  | 37.61  | 4.76  | 0.00     | 2.40 | 0.00 | 71.85 | 0.00   | 1.53        | 17.44 | 4.84  | 147.4    | 278.60 | 8.48        | 138.1 | 0.00  | 34.34  | 270.8 | 4.81  | 45.38      | 16.85    | 28.53    | 45.95  |

**Suppl. Table 2.** Relative abundance of detected intact polar lipids at all four stations (1, 2, 5 and 8) in the Easter Tropical North Pacific.

| Station | Depth (m) | Total IPL<br>(ng/L) | Relative Abundance (%) |        |        |       |            |       |       |       |       |        |        |        |      |          |      |      |      |      |           |           |         |         |         |          |
|---------|-----------|---------------------|------------------------|--------|--------|-------|------------|-------|-------|-------|-------|--------|--------|--------|------|----------|------|------|------|------|-----------|-----------|---------|---------|---------|----------|
|         |           |                     | 1G-DAG                 | 2G-DAG | SQ-DAG | DGTS  | PE+PC-ABEG | PE    | PC    | PG    | DPG   | 3G-DAG | SQ-DEG | 1G-Cer | DGCC | 2nd DGCC | OL   | PME  | PDME | PI   | 1G-OH-DAG | 1G-OH-Cer | OH-DGTS | 1G-GDGT | 2G-GDGT | HPH-GDGT |
| 1       | 3         | 882.25              | 17.42                  | 9.76   | 51.22  | 1.34  | 1.41       | 2.82  | 3.51  | 9.03  | 0.00  | 0.18   | 1.27   | 0.28   | 0.01 | 0.93     | 0.00 | 0.00 | 0.00 | 0.53 | 0.07      | 0.23      | 0.00    | 0.00    | 0.00    | 0.00     |
| 1       | 25        | 1357.81             | 18.44                  | 9.58   | 34.31  | 5.26  | 4.89       | 3.19  | 5.04  | 13.52 | 0.01  | 0.17   | 1.68   | 0.56   | 0.07 | 1.90     | 0.00 | 0.00 | 0.00 | 0.34 | 0.26      | 0.78      | 0.00    | 0.00    | 0.00    | 0.00     |
| 1       | 35        | 361.55              | 15.03                  | 13.55  | 16.68  | 2.43  | 29.83      | 2.99  | 8.53  | 3.97  | 0.07  | 0.47   | 0.31   | 0.80   | 0.34 | 2.16     | 0.00 | 0.00 | 0.00 | 1.81 | 0.37      | 0.66      | 0.00    | 0.00    | 0.00    | 0.00     |
| 1       | 75        | 303.98              | 28.54                  | 8.71   | 39.77  | 0.92  | 4.24       | 1.53  | 3.66  | 7.70  | 0.23  | 0.22   | 0.00   | 0.44   | 0.16 | 1.91     | 0.00 | 0.00 | 0.00 | 0.35 | 0.34      | 0.50      | 0.00    | 0.24    | 0.12    | 0.40     |
| 1       | 120       | 22.26               | 22.94                  | 4.47   | 8.65   | 5.51  | 11.84      | 4.20  | 10.66 | 14.38 | 1.10  | 0.08   | 0.00   | 1.39   | 0.23 | 2.90     | 0.00 | 0.12 | 0.41 | 0.27 | 0.00      | 0.53      | 0.00    | 3.28    | 2.55    | 4.50     |
| 1       | 200       | 8.38                | 23.18                  | 0.98   | 0.68   | 14.04 | 11.89      | 3.81  | 10.88 | 5.69  | 0.79  | 0.00   | 0.00   | 1.15   | 0.43 | 2.87     | 0.00 | 1.07 | 2.34 | 0.00 | 0.00      | 0.34      | 0.00    | 16.41   | 3.22    | 0.25     |
| 1       | 300       | 2.88                | 21.42                  | 2.87   | 4.02   | 7.79  | 4.46       | 4.10  | 4.95  | 18.54 | 4.79  | 0.00   | 0.00   | 1.18   | 1.24 | 3.21     | 0.00 | 2.85 | 0.00 | 0.00 | 0.00      | 1.16      | 0.00    | 14.85   | 2.58    | 0.00     |
| 1       | 400       | 56.4                | 3.10                   | 2.93   | 11.30  | 2.73  | 0.00       | 8.78  | 8.08  | 50.56 | 3.14  | 0.00   | 0.37   | 0.36   | 1.48 | 2.27     | 0.00 | 1.98 | 0.61 | 0.07 | 0.00      | 0.00      | 0.00    | 1.45    | 0.78    | 0.00     |
| 1       | 600       | 11.42               | 5.58                   | 0.88   | 2.83   | 3.54  | 3.94       | 15.05 | 7.98  | 33.89 | 3.11  | 0.00   | 0.00   | 0.00   | 1.30 | 0.22     | 0.00 | 4.33 | 0.14 | 0.00 | 0.10      | 0.00      | 0.00    | 13.32   | 3.81    | 0.00     |
| 1       | 725       | 9.67                | 9.79                   | 1.01   | 1.89   | 9.58  | 8.73       | 6.10  | 13.25 | 16.22 | 1.46  | 0.00   | 0.00   | 0.31   | 0.32 | 2.11     | 0.00 | 0.00 | 0.00 | 0.18 | 0.00      | 0.53      | 0.00    | 14.95   | 10.41   | 3.16     |
| 1       | 820       | 3.25                | 12.34                  | 1.98   | 1.06   | 8.36  | 11.40      | 7.31  | 15.11 | 16.81 | 1.76  | 0.00   | 0.00   | 0.34   | 0.21 | 2.97     | 0.00 | 0.00 | 0.00 | 0.07 | 0.00      | 0.46      | 0.00    | 9.31    | 9.38    | 1.15     |
| 1       | 1250      | 0.82                | 32.36                  | 1.28   | 1.91   | 14.91 | 1.95       | 0.85  | 1.64  | 12.96 | 1.39  | 0.00   | 0.00   | 0.60   | 0.31 | 1.59     | 0.00 | 0.00 | 0.00 | 0.00 | 0.20      | 0.47      | 0.00    | 20.97   | 6.31    | 0.31     |
| 2       | 3         | 266.21              | 9.31                   | 18.86  | 35.71  | 6.82  | 4.85       | 1.43  | 8.63  | 6.16  | 0.11  | 0.23   | 1.43   | 0.85   | 0.15 | 2.50     | 0.03 | 0.00 | 0.26 | 0.39 | 0.04      | 0.50      | 1.73    | 0.00    | 0.00    | 0.00     |
| 2       | 6         | 349.59              | 30.10                  | 14.90  | 20.28  | 7.18  | 5.91       | 0.85  | 3.52  | 8.96  | 0.08  | 0.03   | 5.02   | 0.12   | 0.04 | 1.00     | 0.00 | 0.12 | 0.00 | 0.37 | 0.11      | 1.40      | 0.01    | 0.00    | 0.00    | 0.00     |
| 2       | 55        | 21.85               | 18.14                  | 17.51  | 12.45  | 3.74  | 26.53      | 2.78  | 8.86  | 3.63  | 0.05  | 0.20   | 0.36   | 0.26   | 0.26 | 3.35     | 0.02 | 0.05 | 0.00 | 0.44 | 0.10      | 1.02      | 0.00    | 0.25    | 0.00    | 0.00     |
| 2       | 85        | 160.03              | 24.27                  | 7.49   | 33.48  | 3.45  | 7.25       | 2.72  | 7.05  | 4.70  | 0.90  | 0.02   | 0.36   | 0.76   | 0.08 | 4.15     | 0.05 | 0.62 | 0.59 | 0.33 | 0.54      | 0.29      | 0.00    | 0.64    | 0.20    | 0.04     |
| 2       | 115       | 50.04               | 7.00                   | 6.60   | 18.20  | 4.97  | 7.41       | 5.81  | 9.06  | 21.86 | 2.01  | 1.61   | 0.91   | 1.80   | 0.28 | 6.16     | 0.13 | 1.51 | 0.32 | 0.26 | 0.00      | 1.07      | 0.00    | 2.05    | 0.98    | 0.00     |
| 2       | 200       | 5.96                | 79.95                  | 0.00   | 0.40   | 10.83 | 0.23       | 0.19  | 0.33  | 0.73  | 0.00  | 0.00   | 0.00   | 0.00   | 0.00 | 0.00     | 0.00 | 0.00 | 0.00 | 0.00 | 0.51      | 0.00      | 0.00    | 6.82    | 0.00    | 0.00     |
| 2       | 400       | 12.59               | 4.18                   | 2.78   | 4.82   | 5.37  | 4.07       | 13.00 | 17.18 | 31.18 | 4.67  | 0.49   | 0.00   | 0.88   | 0.00 | 1.55     | 0.54 | 3.91 | 1.85 | 0.13 | 0.00      | 0.00      | 0.00    | 1.71    | 0.71    | 0.95     |
| 2       | 600       | 11.76               | 2.37                   | 0.00   | 12.47  | 2.11  | 1.94       | 0.05  | 1.94  | 34.06 | 11.26 | 0.00   | 0.00   | 0.00   | 0.00 | 0.00     | 0.00 | 0.00 | 6.06 | 0.00 | 0.00      | 0.00      | 0.00    | 6.48    | 13.81   | 7.50     |
| 2       | 830       | 7.24                | 6.24                   | 3.45   | 6.81   | 7.74  | 12.55      | 8.69  | 11.48 | 14.99 | 1.56  | 0.99   | 0.51   | 1.22   | 0.18 | 5.07     | 0.01 | 2.94 | 1.74 | 0.65 | 0.00      | 1.14      | 0.00    | 5.10    | 1.81    | 5.10     |
| 5       | 3         | 244.4               | 23.11                  | 16.14  | 18.40  | 24.59 | 3.77       | 0.79  | 4.12  | 4.64  | 0.14  | 0.00   | 1.21   | 1.08   | 0.02 | 0.42     | 0.00 | 0.00 | 0.00 | 0.12 | 0.85      | 0.53      | 0.07    | 0.00    | 0.00    | 0.00     |
| 5       | 25        | 1187.57             | 66.08                  | 1.03   | 4.14   | 22.93 | 0.00       | 0.21  | 0.44  | 4.47  | 0.00  | 0.00   | 0.00   | 0.00   | 0.17 | 0.19     | 0.00 | 0.00 | 0.00 | 0.06 | 0.29      | 0.00      | 0.00    | 0.00    | 0.00    | 0.00     |
| 5       | 35        | 38.14               | 67.72                  | 0.74   | 4.03   | 14.54 | 2.78       | 0.42  | 1.66  | 3.30  | 0.03  | 0.00   | 0.00   | 0.59   | 0.00 | 0.19     | 0.00 | 0.05 | 0.00 | 0.03 | 0.76      | 0.00      | 1.00    | 2.16    | 0.00    | 0.00     |
| 5       | 75        | 174.78              | 20.48                  | 11.04  | 49.35  | 2.91  | 0.21       | 0.33  | 0.87  | 8.61  | 1.81  | 0.01   | 0.25   | 0.18   | 0.02 | 0.33     | 0.01 | 0.09 | 0.18 | 0.18 | 0.42      | 0.00      | 0.02    | 1.06    | 0.85    | 0.80     |

|   |      |         |       |       |       |       |       |       |       |       |      |      |      |      |      |      |      |       |      |      |      |      |      |       |      |       |
|---|------|---------|-------|-------|-------|-------|-------|-------|-------|-------|------|------|------|------|------|------|------|-------|------|------|------|------|------|-------|------|-------|
| 5 | 125  | 2.32    | 3.91  | 6.66  | 35.32 | 5.65  | 9.32  | 3.58  | 2.80  | 3.57  | 0.77 | 0.24 | 0.17 | 1.77 | 0.22 | 5.59 | 0.00 | 11.94 | 0.40 | 0.14 | 0.07 | 0.00 | 0.03 | 7.06  | 0.00 | 0.79  |
| 5 | 250  | 1.05    | 41.71 | 0.00  | 0.00  | 0.00  | 0.00  | 0.05  | 0.00  | 0.00  | 0.00 | 0.00 | 0.00 | 0.00 | 0.00 | 0.00 | 0.00 | 0.00  | 0.00 | 0.00 | 0.00 | 0.00 | 0.00 | 58.29 | 0.00 | 0.00  |
| 5 | 400  | 11.22   | 5.42  | 2.83  | 4.97  | 7.65  | 3.42  | 11.79 | 11.26 | 33.04 | 3.35 | 0.36 | 0.00 | 0.40 | 0.09 | 2.12 | 0.48 | 5.11  | 1.29 | 0.14 | 0.00 | 0.35 | 0.00 | 4.01  | 0.79 | 1.12  |
| 5 | 600  | 21.35   | 3.87  | 4.16  | 6.35  | 5.83  | 2.06  | 17.10 | 15.09 | 21.99 | 5.47 | 1.30 | 0.44 | 2.18 | 0.30 | 4.06 | 0.66 | 5.38  | 2.75 | 0.35 | 0.00 | 0.67 | 0.00 | 0.00  | 0.00 | 0.00  |
| 5 | 830  | 12.36   | 5.68  | 3.63  | 7.17  | 7.71  | 12.82 | 8.60  | 11.57 | 15.35 | 1.59 | 1.05 | 0.54 | 1.29 | 0.18 | 5.27 | 0.11 | 3.14  | 1.96 | 0.68 | 0.00 | 1.20 | 0.00 | 4.13  | 1.25 | 5.07  |
| 8 | 3    | 955.41  | 11.21 | 16.19 | 14.89 | 9.00  | 5.75  | 3.99  | 13.62 | 8.61  | 0.49 | 0.01 | 2.40 | 1.13 | 0.05 | 3.47 | 0.35 | 0.50  | 0.22 | 0.69 | 0.21 | 0.25 | 6.92 | 0.03  | 0.00 | 0.03  |
| 8 | 10   | 1458.79 | 8.55  | 18.50 | 19.24 | 6.02  | 12.12 | 3.23  | 11.57 | 8.26  | 0.15 | 0.08 | 2.45 | 1.40 | 0.10 | 3.82 | 0.13 | 0.05  | 0.07 | 1.10 | 0.00 | 0.15 | 2.99 | 0.00  | 0.00 | 0.00  |
| 8 | 25   | 348.72  | 13.22 | 22.19 | 11.63 | 6.76  | 12.91 | 3.92  | 9.53  | 8.16  | 0.04 | 0.08 | 1.38 | 0.99 | 0.59 | 3.72 | 0.07 | 0.09  | 0.00 | 0.03 | 0.14 | 1.34 | 3.21 | 0.00  | 0.00 | 0.00  |
| 8 | 50   | 474.36  | 18.03 | 18.29 | 18.36 | 5.69  | 10.18 | 5.30  | 11.27 | 3.07  | 0.22 | 0.07 | 0.27 | 1.13 | 0.58 | 3.25 | 0.00 | 0.00  | 0.00 | 0.34 | 0.53 | 0.74 | 0.88 | 0.84  | 0.24 | 0.74  |
| 8 | 125  | 54.21   | 9.82  | 1.91  | 1.67  | 4.36  | 14.11 | 8.51  | 15.81 | 6.48  | 0.90 | 0.03 | 0.10 | 1.30 | 0.36 | 3.48 | 0.02 | 1.86  | 0.84 | 0.19 | 0.00 | 0.41 | 1.00 | 9.07  | 6.71 | 11.05 |
| 8 | 200  | 3.78    | 41.10 | 0.23  | 0.31  | 14.47 | 0.00  | 0.05  | 0.29  | 1.75  | 0.98 | 0.00 | 0.00 | 0.14 | 0.29 | 0.73 | 0.00 | 0.00  | 0.00 | 0.53 | 0.00 | 0.31 | 1.11 | 22.28 | 0.42 | 15.04 |
| 8 | 350  | 19.54   | 6.68  | 1.35  | 1.12  | 10.54 | 8.51  | 7.51  | 12.56 | 11.34 | 5.65 | 0.12 | 0.00 | 2.30 | 0.54 | 7.20 | 0.20 | 6.04  | 4.29 | 0.08 | 0.00 | 0.99 | 1.79 | 6.52  | 1.01 | 3.65  |
| 8 | 450  | 1.47    | 24.18 | 0.00  | 0.00  | 22.57 | 2.09  | 1.17  | 2.40  | 1.45  | 0.45 | 0.00 | 0.00 | 0.48 | 0.78 | 1.08 | 0.00 | 1.06  | 3.21 | 0.00 | 0.00 | 0.34 | 2.39 | 22.79 | 0.87 | 12.67 |
| 8 | 550  | 17.19   | 9.40  | 1.43  | 3.49  | 8.68  | 9.44  | 11.39 | 15.51 | 15.13 | 1.86 | 0.22 | 0.00 | 0.00 | 0.37 | 5.75 | 0.10 | 5.27  | 2.87 | 0.15 | 0.00 | 0.73 | 0.60 | 4.02  | 1.44 | 2.13  |
| 8 | 650  | 5.07    | 32.44 | 0.00  | 0.00  | 30.37 | 1.24  | 0.05  | 0.63  | 1.22  | 0.04 | 0.00 | 0.00 | 0.00 | 1.31 | 1.03 | 0.00 | 0.00  | 0.00 | 0.00 | 0.00 | 0.00 | 1.59 | 19.45 | 0.14 | 10.53 |
| 8 | 750  | 0.1     | 14.54 | 0.00  | 0.00  | 0.36  | 0.00  | 0.05  | 0.05  | 0.00  | 0.00 | 0.00 | 0.00 | 0.00 | 0.00 | 0.04 | 0.00 | 0.00  | 0.00 | 0.00 | 0.00 | 0.00 | 0.00 | 61.21 | 0.00 | 23.85 |
| 8 | 1000 | 0.1     | 37.87 | 0.00  | 0.00  | 1.59  | 0.00  | 0.05  | 0.05  | 0.00  | 0.00 | 0.00 | 0.00 | 0.00 | 0.00 | 0.07 | 0.00 | 0.00  | 0.00 | 0.00 | 0.00 | 0.00 | 0.00 | 40.69 | 0.00 | 19.77 |
| 8 | 1250 | 0.12    | 47.27 | 0.00  | 0.00  | 0.61  | 0.00  | 0.05  | 0.05  | 0.00  | 0.00 | 0.00 | 0.00 | 0.00 | 0.00 | 0.05 | 0.00 | 0.00  | 0.00 | 0.00 | 0.12 | 0.00 | 0.79 | 36.26 | 0.00 | 14.85 |

**Suppl. Table 3.** Fatty acyl combinations (chain lengths and double bonds) of the major groups of intact polar lipids and their relative abundance at different depths within the water column of the Eastern Tropical North Pacific.

| IPL    | <i>m/z</i> (pos mode) | Chain length | Double bonds | FA combination | Rel. Abundance (%) |       |           |       |          |      |               |      |
|--------|-----------------------|--------------|--------------|----------------|--------------------|-------|-----------|-------|----------|------|---------------|------|
|        |                       |              |              |                | Oxic               |       | Upper OMZ |       | Core OMZ |      | Deep Oxycline |      |
|        |                       |              |              |                | Mean               | SD    | Mean      | SD    | Mean     | SD   | Mean          | SD   |
| 1G-DAG | 788.531               | 36           | 8            |                | 1.86               | 1.03  | 3.55      | 4.15  | 0.74     | 0.50 | 1.10          | 0.24 |
|        | 786.515               | 36           | 9            | 18:4/18:4      | 6.05               | 7.89  | 1.72      | 1.67  | 0.84     | 0.87 | 1.52          | 0.31 |
|        | 774.609               | 34           | 1            |                | 2.69               | 1.99  | 1.48      | 1.36  | 2.59     | 1.93 | 2.96          | 1.06 |
|        | 766.546               | 34           | 5            |                | 1.17               | 0.82  | 1.74      | 1.31  | 1.11     | 0.47 | 3.43          | 3.63 |
|        | 762.515               | 34           | 7            | 18:3/16:4      | 5.07               | 3.61  | 1.59      | 1.00  | 2.20     | 1.52 | 2.70          | 0.61 |
|        | 746.578               | 32           | 1            |                | 3.82               | 5.24  | 3.59      | 2.09  | 4.53     | 1.78 | 4.54          | 0.71 |
|        | 732.562               | 31           | 1            |                | 2.09               | 2.55  | 2.02      | 1.51  | 2.96     | 1.93 | 2.43          | 1.72 |
|        | 720.562               | 30           | 0            | 16:0/14:0      | 6.98               | 10.09 | 5.76      | 2.92  | 7.15     | 3.49 | 6.99          | 0.86 |
|        | 718.546               | 30           | 1            | 16:1/14:0      | 27.91              | 10.70 | 40.79     | 11.46 | 49.59    | 5.41 | 39.07         | 3.42 |
|        | 716.531               | 30           | 2            | 16:2/14:0      | 10.59              | 7.40  | 11.90     | 5.88  | 7.93     | 2.21 | 7.74          | 2.53 |
|        | 692.531               | 28           | 0            |                | 4.79               | 2.82  | 2.97      | 1.30  | 4.48     | 1.18 | 3.71          | 1.20 |
|        | 690.515               | 28           | 1            |                | 3.83               | 2.61  | 4.54      | 2.48  | 3.18     | 1.18 | 2.45          | 1.35 |
| 2G-DAG | 948.568               | 36           | 9            |                | 2.11               | 1.62  | 1.18      | 1.35  | 0.41     | 0.50 | 4.10          | 6.60 |
|        | 936.662               | 34           | 1            | 18:1/16:0      | 5.27               | 2.43  | 4.50      | 4.54  | 13.94    | 1.86 | 11.00         | 5.92 |
|        | 934.646               | 34           | 2            | 18:2/16:0      | 6.68               | 2.86  | 2.87      | 2.77  | 7.43     | 3.02 | 9.11          | 4.42 |
|        | 932.631               | 34           | 3            | 18:3/16:0      | 4.94               | 1.71  | 2.45      | 1.91  | 2.95     | 1.75 | 4.93          | 1.89 |
|        | 930.615               | 34           | 4            |                | 3.15               | 1.65  | 1.66      | 1.62  | 1.54     | 0.89 | 3.37          | 1.14 |
|        | 928.599               | 34           | 5            | 18:3/16:2      | 4.11               | 1.86  | 1.64      | 1.22  | 1.43     | 0.93 | 6.93          | 9.29 |
|        | 926.584               | 34           | 6            |                | 3.12               | 1.66  | 1.61      | 1.56  | 1.36     | 0.91 | 2.28          | 1.57 |
|        | 924.568               | 34           | 7            | 18:3/16:4      | 4.90               | 2.40  | 1.73      | 1.78  | 1.20     | 0.80 | 2.75          | 0.39 |
|        | 908.631               | 32           | 1            | 18:1/14:0 ;    | 5.03               | 2.49  | 13.67     | 12.27 | 23.54    | 5.07 | 15.29         | 4.20 |
|        | 906.615               | 32           | 2            |                | 2.20               | 0.92  | 3.52      | 4.42  | 2.89     | 1.71 | 3.42          | 0.84 |
|        | 902.584               | 32           | 4            | 18:4/14:0      | 5.45               | 2.91  | 1.14      | 2.07  | 0.78     | 0.68 | 0.76          | 0.94 |
|        | 900.568               | 32           | 5            | 18:5/14:0      | 4.76               | 2.10  | 4.25      | 13.38 | 0.17     | 0.49 | 0.63          | 1.27 |
|        | 898.552               | 32           | 6            |                | 4.19               | 7.62  | 0.27      | 0.42  | 0.00     | 0.00 | 0.00          | 0.00 |
|        | 882.615               | 30           | 0            | 16:0/14:0      | 13.49              | 6.98  | 17.20     | 7.58  | 15.68    | 1.76 | 9.10          | 7.37 |
|        | 880.599               | 30           | 1            | 16:1/14:0      | 9.95               | 3.90  | 24.46     | 11.88 | 16.88    | 2.52 | 9.50          | 6.58 |
|        | 878.584               | 30           | 2            | 16:2/14:0      | 2.71               | 2.54  | 5.21      | 4.96  | 0.09     | 0.26 | 0.00          | 0.00 |
|        | 854.584               | 28           | 0            |                | 3.82               | 2.91  | 3.17      | 3.47  | 2.73     | 4.45 | 1.72          | 3.44 |
| SQ-DAG | 838.571               | 34           | 1            | 18:1/16:0      | 1.97               | 1.08  | 2.83      | 3.36  | 4.98     | 4.57 | 8.52          | 7.97 |
|        | 836.555               | 34           | 2            |                | 4.02               | 2.38  | 1.70      | 1.63  | 1.02     | 1.23 | 1.64          | 1.90 |
|        | 834.540               | 34           | 3            |                | 3.22               | 1.71  | 0.56      | 0.72  | 0.44     | 0.87 | 1.24          | 1.43 |

|    |         |    |    |             |       |       |       |       |       |       |       |       |
|----|---------|----|----|-------------|-------|-------|-------|-------|-------|-------|-------|-------|
|    | 812.555 | 32 | 0  | 16:0/16:0 ; | 9.15  | 3.10  | 4.46  | 3.78  | 9.29  | 4.07  | 12.60 | 3.12  |
|    | 810.540 | 32 | 1  | 16:1/16:0   | 7.29  | 2.63  | 11.61 | 6.09  | 12.53 | 2.50  | 10.36 | 4.74  |
|    | 808.524 | 32 | 2  | 16:1/16:1   | 5.23  | 3.07  | 11.49 | 7.09  | 6.69  | 3.79  | 5.43  | 4.34  |
|    | 784.524 | 30 | 0  | 16:0/14:0   | 26.72 | 5.24  | 24.93 | 16.07 | 30.45 | 3.33  | 30.89 | 3.33  |
|    | 782.508 | 30 | 1  | 16:1/14:0   | 15.90 | 6.46  | 31.16 | 11.93 | 13.75 | 4.21  | 12.69 | 4.69  |
|    | 780.493 | 30 | 2  | 16:2/14:0   | 4.95  | 3.47  | 2.81  | 4.28  | 7.29  | 11.51 | 0.47  | 0.54  |
|    | 756.493 | 28 | 0  | 14:0/14:0   | 16.24 | 6.46  | 6.84  | 5.26  | 13.57 | 11.15 | 13.66 | 9.59  |
| PG | 806.591 | 37 | 2  |             | 1.59  | 2.88  | 1.88  | 2.51  | 3.07  | 1.23  | 2.63  | 1.39  |
|    | 792.575 | 36 | 2  | 18:1/18:1   | 9.81  | 5.61  | 7.12  | 3.44  | 9.78  | 3.67  | 7.69  | 0.25  |
|    | 780.575 | 35 | 1  |             | 1.55  | 2.32  | 3.48  | 2.67  | 4.22  | 1.57  | 3.26  | 0.62  |
|    | 778.559 | 35 | 2  | 18:1/17:1 ; | 3.26  | 2.46  | 10.69 | 6.95  | 13.26 | 2.11  | 11.05 | 0.62  |
|    | 766.559 | 34 | 1  | 18:1/16:0   | 12.32 | 2.78  | 8.63  | 8.75  | 7.21  | 2.63  | 7.00  | 0.45  |
|    | 764.544 | 34 | 2  | 18:2/16:0   | 21.87 | 10.62 | 18.84 | 8.87  | 19.50 | 4.17  | 25.57 | 4.49  |
|    | 762.528 | 34 | 3  | 18:3/16:0   | 15.03 | 9.19  | 2.67  | 3.22  | 3.78  | 1.34  | 3.78  | 0.32  |
|    | 752.544 | 33 | 1  | 17:1/15:0   | 7.52  | 4.63  | 13.03 | 5.80  | 16.60 | 2.27  | 14.65 | 3.77  |
|    | 738.528 | 32 | 1  | 16:1/16:0   | 11.41 | 4.41  | 11.43 | 5.08  | 10.84 | 3.29  | 10.11 | 1.45  |
|    | 736.512 | 32 | 2  | 16:1/16:1   | 13.19 | 3.79  | 19.08 | 12.58 | 9.77  | 2.20  | 10.42 | 0.80  |
|    | 710.497 | 30 | 1  |             | 2.31  | 1.41  | 3.09  | 1.76  | 1.76  | 1.22  | 3.84  | 0.17  |
| PE | 730.538 | 32 | 2  | 18:1/17:1   | 12.02 | 9.37  | 19.53 | 13.16 | 23.32 | 7.97  | 19.51 | 11.03 |
|    | 718.538 | 34 | 1  | 18:1/16:0   | 7.28  | 6.14  | 6.44  | 7.72  | 11.29 | 5.49  | 9.85  | 6.57  |
|    | 716.522 | 34 | 2  | 18:1/16:1 ; | 3.78  | 3.64  | 2.91  | 2.90  | 9.97  | 8.36  | 3.83  | 2.93  |
|    | 704.522 | 33 | 1  | 17:1/16:0   | 22.14 | 14.88 | 16.16 | 8.54  | 13.55 | 2.63  | 10.32 | 6.89  |
|    | 702.507 | 33 | 2  |             | 1.32  | 1.33  | 1.79  | 2.25  | 2.05  | 1.35  | 4.12  | 5.50  |
|    | 690.507 | 32 | 1  | 16:1/16:0   | 6.93  | 10.80 | 5.53  | 7.05  | 7.11  | 4.76  | 8.29  | 10.09 |
|    | 688.491 | 32 | 2  |             | 2.26  | 4.02  | 3.14  | 10.46 | 3.16  | 3.63  | 0.48  | 0.97  |
|    | 678.507 | 31 | 0  | 16:0/15:0   | 33.48 | 20.83 | 23.89 | 15.41 | 10.07 | 4.24  | 15.60 | 11.12 |
|    | 676.491 | 31 | 1  |             | 3.82  | 3.31  | 2.83  | 2.43  | 3.07  | 1.10  | 1.66  | 1.85  |
|    | 674.476 | 31 | 2  |             | 0.09  | 0.30  | 0.02  | 0.07  | 0.04  | 0.11  | 0.00  | 0.00  |
|    | 664.491 | 30 | 0  | 16:0/14:0   | 1.54  | 2.69  | 8.02  | 8.30  | 6.76  | 2.37  | 11.74 | 4.36  |
|    | 662.476 | 30 | 1  |             | 1.57  | 1.44  | 2.74  | 5.83  | 1.92  | 1.77  | 2.72  | 4.35  |
|    | 650.476 | 29 | 0  | 15:0/14:0   | 2.61  | 2.09  | 6.66  | 5.43  | 6.50  | 3.55  | 10.94 | 8.75  |
|    | 648.460 | 29 | 1  |             | 0.08  | 0.19  | 0.14  | 0.34  | 0.04  | 0.11  | 0.00  | 0.00  |
|    | 636.460 | 28 | 0  |             | 1.08  | 1.54  | 0.21  | 0.49  | 1.17  | 0.88  | 0.95  | 1.44  |
| PC | 878.575 | 44 | 12 | 22:6/22:6   | 3.87  | 3.27  | 6.12  | 11.60 | 3.83  | 7.70  | 2.29  | 3.39  |
|    | 852.560 | 42 | 9  | 22:6/20:5   | 1.87  | 1.60  | 2.90  | 3.11  | 3.55  | 6.04  | 4.79  | 5.74  |
|    | 822.601 | 39 | 5  |             | 1.59  | 1.12  | 1.50  | 1.49  | 0.67  | 0.93  | 1.47  | 1.35  |
|    | 806.569 | 38 | 6  | 22:6/16:0   | 20.28 | 7.02  | 19.69 | 16.84 | 13.97 | 11.29 | 36.10 | 36.79 |
|    | 788.616 | 36 | 1  |             | 1.74  | 1.20  | 1.76  | 1.63  | 2.28  | 4.20  | 0.74  | 0.68  |
|    | 780.554 | 36 | 5  | 20:5/16:0   | 12.14 | 7.79  | 9.03  | 6.74  | 4.58  | 3.79  | 8.41  | 6.72  |
|    | 776.616 | 35 | 0  |             | 0.49  | 0.66  | 1.09  | 1.23  | 0.59  | 0.58  | 0.71  | 0.77  |
|    | 774.601 | 35 | 1  |             | 1.69  | 0.98  | 1.68  | 1.58  | 1.53  | 1.07  | 2.12  | 3.00  |
|    | 760.585 | 34 | 1  | 18:1/16:0   | 6.68  | 4.39  | 5.27  | 3.65  | 8.01  | 8.70  | 2.70  | 3.23  |
|    | 754.538 | 34 | 4  |             | 2.73  | 1.57  | 1.86  | 2.02  | 0.76  | 0.66  | 1.15  | 1.10  |

|      |         |    |   |             |      |      |       |       |       |       |       |      |
|------|---------|----|---|-------------|------|------|-------|-------|-------|-------|-------|------|
|      | 748.585 | 33 | 0 |             | 1.21 | 1.18 | 1.93  | 1.89  | 1.59  | 1.36  | 1.24  | 1.20 |
|      | 746.569 | 33 | 1 |             | 1.85 | 3.95 | 3.18  | 3.63  | 3.88  | 2.12  | 2.66  | 2.43 |
|      | 744.554 | 33 | 2 | 17:1/16:1   | 0.91 | 1.03 | 1.97  | 1.68  | 5.96  | 6.54  | 2.33  | 1.39 |
|      | 734.569 | 32 | 0 | 16:0/16:0 ; | 6.20 | 3.84 | 4.16  | 3.36  | 4.78  | 4.00  | 3.09  | 2.34 |
|      | 732.554 | 32 | 1 | 16:0/16:1   | 4.83 | 2.98 | 5.96  | 3.69  | 7.15  | 3.92  | 6.15  | 3.68 |
|      | 730.538 | 32 | 2 | 16:1/16:1   | 2.19 | 1.51 | 4.96  | 4.91  | 7.57  | 4.32  | 4.47  | 3.08 |
|      | 720.554 | 31 | 0 |             | 1.86 | 1.32 | 2.86  | 3.45  | 2.09  | 1.43  | 1.61  | 1.59 |
|      | 718.538 | 31 | 1 |             | 1.65 | 1.61 | 1.91  | 3.22  | 3.86  | 2.53  | 2.63  | 2.51 |
|      | 716.522 | 31 | 2 |             | 0.91 | 1.01 | 0.87  | 1.10  | 4.55  | 5.76  | 0.97  | 0.89 |
|      | 706.538 | 30 | 0 | 16:0/14:0   | 9.35 | 2.79 | 5.68  | 4.00  | 3.29  | 1.87  | 2.53  | 2.65 |
|      | 704.522 | 30 | 1 | 16:1/14:0   | 4.89 | 4.78 | 3.71  | 2.41  | 4.62  | 2.79  | 2.75  | 2.62 |
|      | 702.507 | 30 | 2 |             | 0.25 | 0.27 | 0.48  | 0.66  | 0.87  | 0.90  | 1.19  | 1.98 |
|      | 692.522 | 29 | 0 |             | 2.13 | 1.68 | 3.21  | 2.35  | 2.26  | 1.52  | 1.67  | 1.99 |
|      | 690.507 | 29 | 1 |             | 2.01 | 3.26 | 1.57  | 1.99  | 3.08  | 3.45  | 2.38  | 3.68 |
|      | 688.491 | 29 | 2 |             | 0.45 | 0.64 | 0.76  | 2.63  | 1.57  | 2.59  | 0.10  | 0.21 |
|      | 678.507 | 28 | 0 | 14:0/14:0   | 6.22 | 3.39 | 5.89  | 4.62  | 3.09  | 1.68  | 3.76  | 3.82 |
| DGTS | 764.640 | 36 | 2 | 18:1/18:1   | 6.72 | 3.20 | 8.70  | 4.81  | 14.23 | 4.45  | 7.86  | 2.68 |
|      | 762.624 | 36 | 3 |             | 3.66 | 1.56 | 2.53  | 0.76  | 1.43  | 0.64  | 3.14  | 0.91 |
|      | 760.609 | 36 | 4 | 18:2/18:2 ; | 7.36 | 2.99 | 4.41  | 2.02  | 1.57  | 0.80  | 5.41  | 2.37 |
|      | 758.593 | 36 | 5 | 18:2/18:3   | 5.12 | 2.44 | 2.89  | 1.46  | 1.45  | 0.80  | 3.96  | 1.22 |
|      | 740.640 | 34 | 0 |             | 1.11 | 0.39 | 2.65  | 1.48  | 4.93  | 1.81  | 1.98  | 1.10 |
|      | 738.624 | 34 | 1 | 18:1/16:0   | 3.90 | 1.70 | 14.87 | 13.30 | 32.49 | 12.73 | 14.69 | 2.83 |
|      | 736.609 | 34 | 2 | 18:2/16:0   | 7.44 | 3.95 | 6.57  | 1.85  | 8.60  | 0.91  | 8.33  | 2.26 |
|      | 734.593 | 34 | 3 | 18:3/16:0   | 5.04 | 2.11 | 2.84  | 1.05  | 1.14  | 0.59  | 3.33  | 0.85 |
|      | 732.577 | 34 | 4 |             | 4.34 | 1.23 | 2.15  | 1.12  | 0.58  | 0.48  | 1.30  | 1.08 |
|      | 710.593 | 32 | 1 | 18:1/14:0   | 3.94 | 1.25 | 6.92  | 2.50  | 9.60  | 4.41  | 10.54 | 2.56 |
|      | 708.577 | 32 | 2 | 18:2/14:0   | 3.85 | 1.31 | 3.80  | 1.46  | 2.89  | 2.26  | 5.61  | 1.86 |
|      | 706.562 | 32 | 3 |             | 2.65 | 0.83 | 2.07  | 1.25  | 0.74  | 0.41  | 3.05  | 2.00 |
|      | 698.593 | 31 | 0 |             | 1.40 | 0.47 | 2.90  | 2.18  | 2.26  | 2.04  | 3.24  | 1.44 |
|      | 684.577 | 30 | 0 | 16:0/14:0   | 3.90 | 1.45 | 3.69  | 1.69  | 2.18  | 1.75  | 3.45  | 0.77 |
|      | 682.562 | 30 | 1 | 16:1/14:0   | 3.58 | 3.14 | 8.92  | 4.80  | 4.13  | 4.52  | 7.75  | 0.96 |
|      | 670.562 | 29 | 0 |             | 3.60 | 1.39 | 3.47  | 1.93  | 2.14  | 1.62  | 2.34  | 0.76 |
|      | 656.546 | 28 | 0 | 14:0/14:0   | 9.56 | 4.74 | 6.54  | 3.47  | 4.44  | 2.18  | 4.81  | 0.46 |

**Suppl. Table 4.** Goodness of fit statistics for the NMDS analyses of normalized intact polar lipid (IPL) composition and quantitative microbial data (FISH), number of double bonds in the IPL and chain length of IPL.

| FISH Probe            | IPL (relative abundance) |       |      |       | Environmental parameter | Number of double bonds |       |      |       | Environmental parameter | Chain length (carbon atoms) |       |      |       |
|-----------------------|--------------------------|-------|------|-------|-------------------------|------------------------|-------|------|-------|-------------------------|-----------------------------|-------|------|-------|
|                       | NMDS1                    | NMDS2 | r2   | p     |                         | NMDS1                  | NMDS2 | r2   | p     |                         | NMDS1                       | NMDS2 | r2   | p     |
| Alphaproteobacteria   | -0.56                    | -0.83 | 0.02 | 0.613 | Depth                   | -0.80                  | 0.59  | 0.12 | 0.081 | Depth                   | 0.48                        | 0.88  | 0.00 | 0.944 |
| Betaproteobacteria    | -0.60                    | -0.80 | 0.10 | 0.133 | POC                     | 0.93                   | -0.35 | 0.19 | 0.019 | POC                     | -0.14                       | 0.99  | 0.05 | 0.340 |
| Gammaproteobacteria   | -0.66                    | -0.76 | 0.24 | 0.004 | TN                      | 0.95                   | -0.30 | 0.20 | 0.012 | TN                      | -0.10                       | 1.00  | 0.56 | 0.324 |
| SRB                   | -0.42                    | -0.91 | 0.33 | 0.002 | Phosphate               | -0.90                  | 0.44  | 0.12 | 0.740 | Phosphate               | 0.06                        | -1.00 | 0.03 | 0.531 |
| Epsilonproteobacteria | -0.88                    | -0.47 | 0.18 | 0.022 | Nitrate                 | -0.51                  | 0.86  | 0.07 | 0.250 | Nitrate                 | 0.65                        | -0.76 | 0.34 | 0.472 |
| Nso                   | -0.94                    | -0.33 | 0.18 | 0.023 | Nitrite                 | -0.57                  | -0.82 | 0.14 | 0.043 | Nitrite                 | -0.54                       | -0.84 | 0.15 | 0.052 |
| Anammox               | -0.04                    | -1.00 | 0.25 | 0.006 | Ammonium                | 0.67                   | -0.75 | 0.06 | 0.311 | Ammonium                | -0.15                       | 0.99  | 0.05 | 0.339 |
| Planctomycetes        | -0.87                    | -0.50 | 0.13 | 0.730 | Salinity                | 0.96                   | 0.29  | 0.00 | 0.909 | Salinity                | 0.94                        | 1.00  | 0.01 | 0.713 |
|                       |                          |       |      |       | Temperature             | 0.66                   | -0.76 | 0.02 | 0.686 | Temperature             | -0.23                       | -0.97 | 0.01 | 0.882 |
|                       |                          |       |      |       | Fluorescence            | 0.97                   | -0.26 | 0.27 | 0.003 | Fluorescence            | 0.04                        | 1.00  | 0.05 | 0.374 |
|                       |                          |       |      |       | Oxygen                  | 0.83                   | -0.55 | 0.26 | 0.002 | Oxygen                  | -0.12                       | 0.99  | 0.09 | 0.138 |
|                       |                          |       |      |       | Chl-a                   | 0.96                   | -0.27 | 0.28 | 0.002 | Chl-a                   | -0.01                       | 1.00  | 0.16 | 0.042 |



**Suppl. Figure 1.** Structures of (a) bacterial/eukaryotic and (b) archaeal IPLs observed in the ETNP. The position of the double bonds and the OH-, epoxy- and keto-groups of the R' and R'' side chains were not determined.

**Suppl. Fig 2.** Section plots of (a) total particulate nitrogen and (b) phaeophytin concentrations, absolute abundance of (c) archaeal and (d) unclassified cells and (e) absolute and (f) relative abundance of archaeal intact polar lipids (IPL) along a northwest-southeast transect of the study area in the ETNP. Numbers across the top panels denote station, black dots are individual samples.

**Suppl. Fig 3.** Identification of hydroxylated aminolipids and sphingolipids in water column samples of the ETNP. (a) HPLC-MS density map, full scan ( $MS^1$ ), in the mass range from  $m/z$  600 to 900 and retention time range from 7 to 9 minutes. Representative high-resolution accurate mass  $MS^2$  mass spectrum showing fragmentation patterns of (b) DGTS, (c) 1OH-DGTS, (d) 3OH-DGTS and (e) 1G-2OH-CER in positive ionization mode. Typical fragments for DGTS include monoacylglycerol side chains with the head group still attached. Similar fragmentation patterns are observed between DGTS, 1OH-DGTS and 3OH-DGTS with exact masses pointing to additional hydroxyl-groups attached to the fatty acyl side chains. Note, that it's possible that the dihydroxylated fatty acid, could also be an epoxy-hydroxy or keto-hydroxy acid as only one loss of water was observed in the  $MS^2$  (from fragment  $m/z$  466.281 to  $m/z$  448.270). Multiple fatty acid side chain combinations are possible. Fragments of 1G-2OH-CER include the glycosidic head group loss of 180 Da and two hydroxyl-group losses as well as the long chain base (LCB),  $m/z$  294.279.

**Suppl. Fig 4.** Identification of aminolipids AL-I and AL-II and ester/ether-sulfoquinovosyl (SQ-AEG) in water column samples of the ETNP. (a) HPLC-MS density map, full scan ( $MS^1$ ), in the mass range from  $m/z$  600 to 900 and retention time range from 6.5 to 11.5 minutes. Representative high-resolution accurate mass  $MS^2$  mass spectrum showing fragmentation patterns of (b) AL-I and (c) AL-II in positive ionization mode. Fragmentation patterns of AL-I and AL-II are very similar to DGTS (Suppl. Fig. 3) showing monoacylglycerol fragments with the amino-head group still attached. The sum formula of the AL-I headgroup matches the head group of DGCC with an extra methyl group. However, since no head group fragments were observed no further structural inference could be made. The sum formula of AL-II matches exactly the head group of DGCC, however, the DGCC-characteristic head group ion fragment  $m/z$  252.144 was not observed and no structural inference from the detected head group fragments  $m/z$  132.102 and 104.107 could be made. Representative high-resolution accurate mass  $MS^2$  mass spectrum showing fragmentation patterns of (d) SQ-DAG and (e) SQ-AEG in positive and negative ionization mode. Both compound classes exhibit the sulfoquinovosyl-diagnostic head group loss of 261.05 Da. However, SQ-AEG only has one fatty acyl side chain fragment, whereas SQ-DAG has two fatty acyl fragments in positive and negative ion mode. Furthermore, the exact mass of the parent ion and the fragments indicate that SQ-AEG has one oxygen less than SQ-DAG, indicating the replacement of one of the ester bonds with an ether bond.

(a)

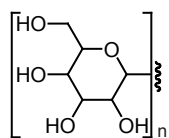

Monoglycosyl (1G), n=1  
Diglycosyl (2G), n=2  
Triglycosyl (3G), n=3

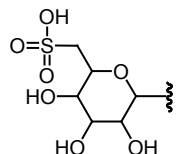

Sulfoquinovosyl (SQ)

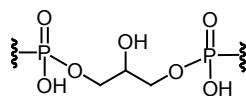

Diphosphatidylglycerol (DPG)

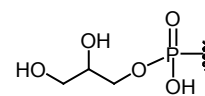

Phosphatidylglycerol (PG)

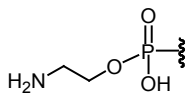

Phosphatidyl-ethanolamine (PE)

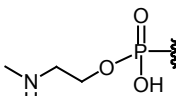

Phosphatidyl-(N) methylethanolamine (PME)

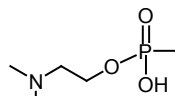

Phosphatidyl-(N,N) dimethylethanolamine (PDME)

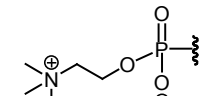

Phosphatidylcholine (PC)

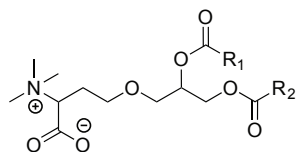

Betaine lipid  
Diacylglyceryl trimethylhomoserine (DGTS)

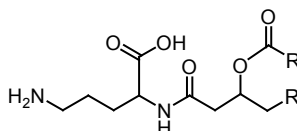

Ornithine lipid (OL)

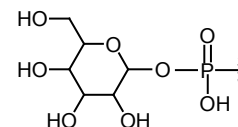

Phosphatidylinositol (PI)

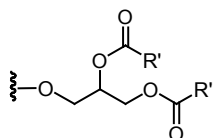

Diacylglycerol (DAG)

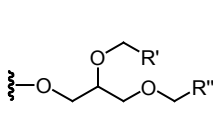

Diether-glycerol (DEG)

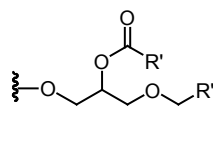

Acyl/ether-glycerol (AEG)

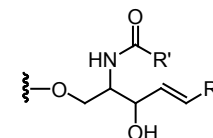

Ceramide (CER)

R',R'' - variations:

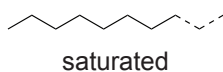

saturated

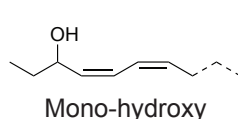

Mono-hydroxy

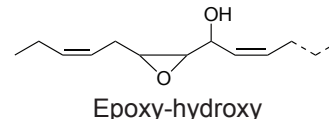

Epoxy-hydroxy

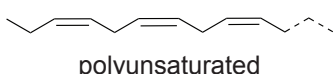

polyunsaturated

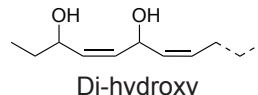

Di-hydroxy

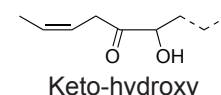

Keto-hydroxy

(b)

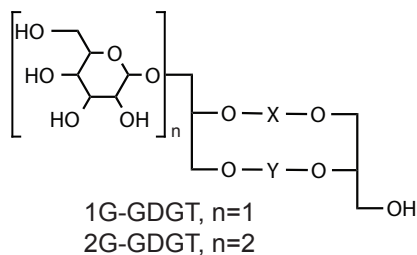

1G-GDGT, n=1  
2G-GDGT, n=2

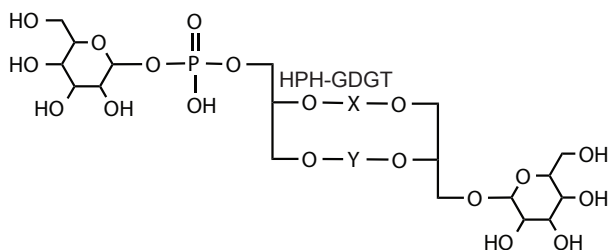

X,Y - variations:

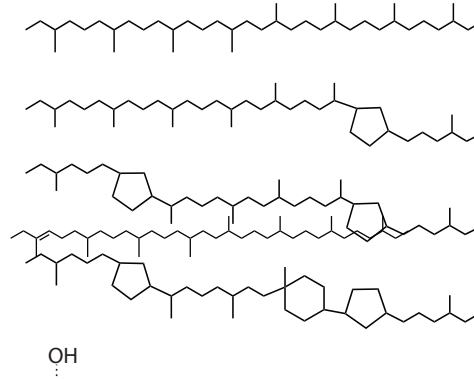

**(a) Total N, particulate ( $\mu\text{g L}^{-1}$ )**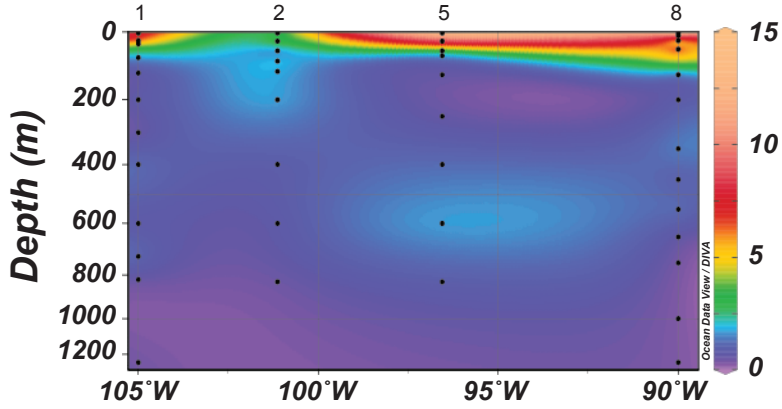**(b) Phaeophytin ( $\mu\text{g L}^{-1}$ )**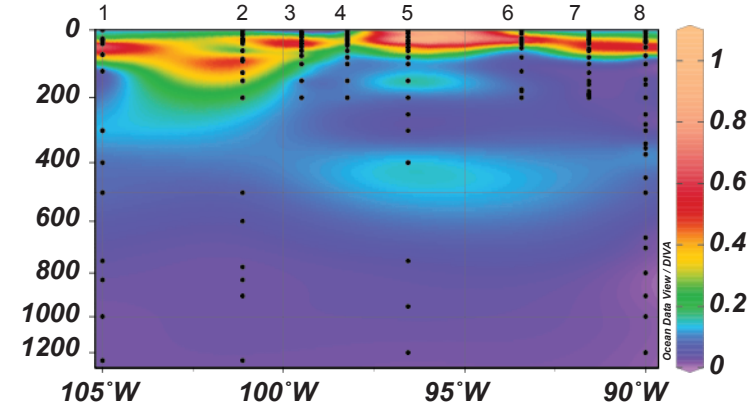**(c) archaeal cells ( $10^8 \text{ L}^{-1}$ )**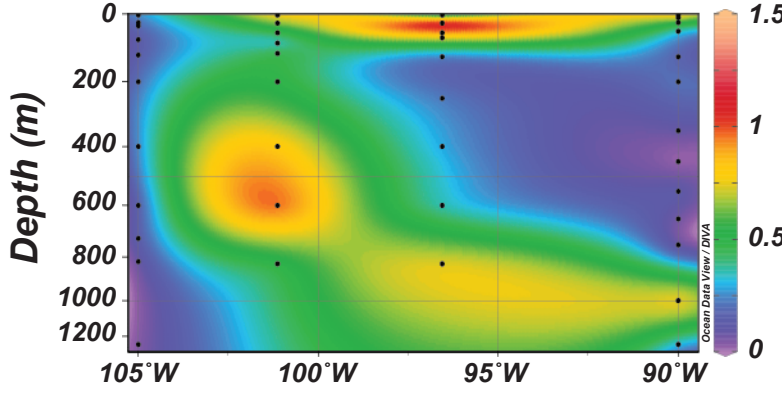**(d) unclassified cells ( $10^8 \text{ L}^{-1}$ )**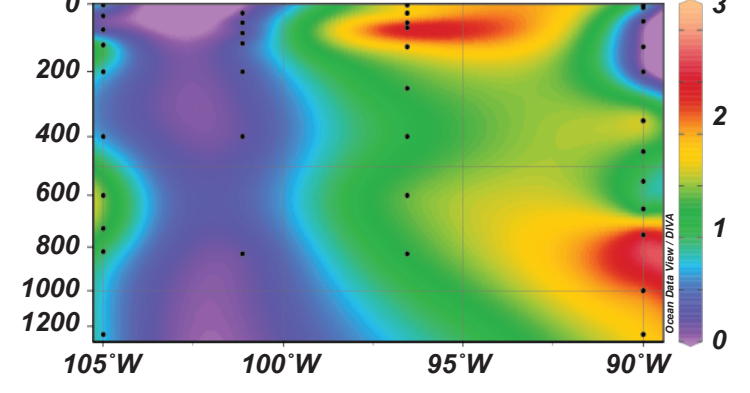**(e) Archaeal IPL ( $\text{ng L}^{-1}$ )**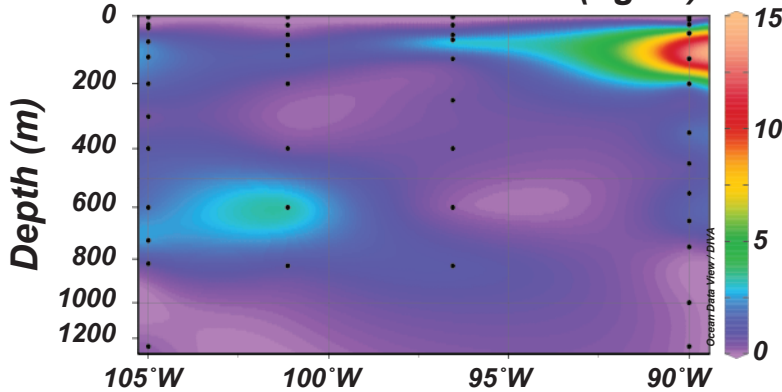**(f) Archaeal IPL (%)**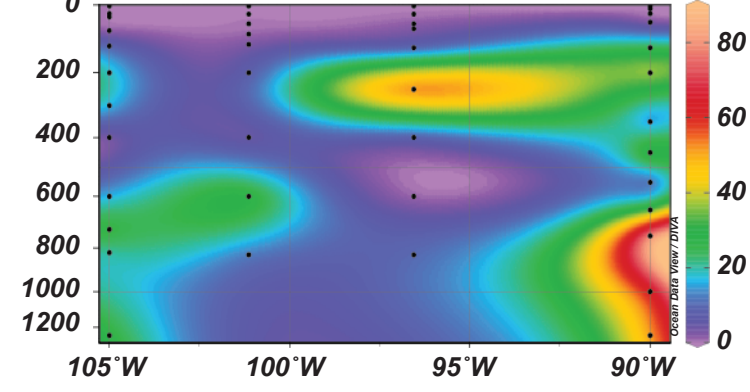

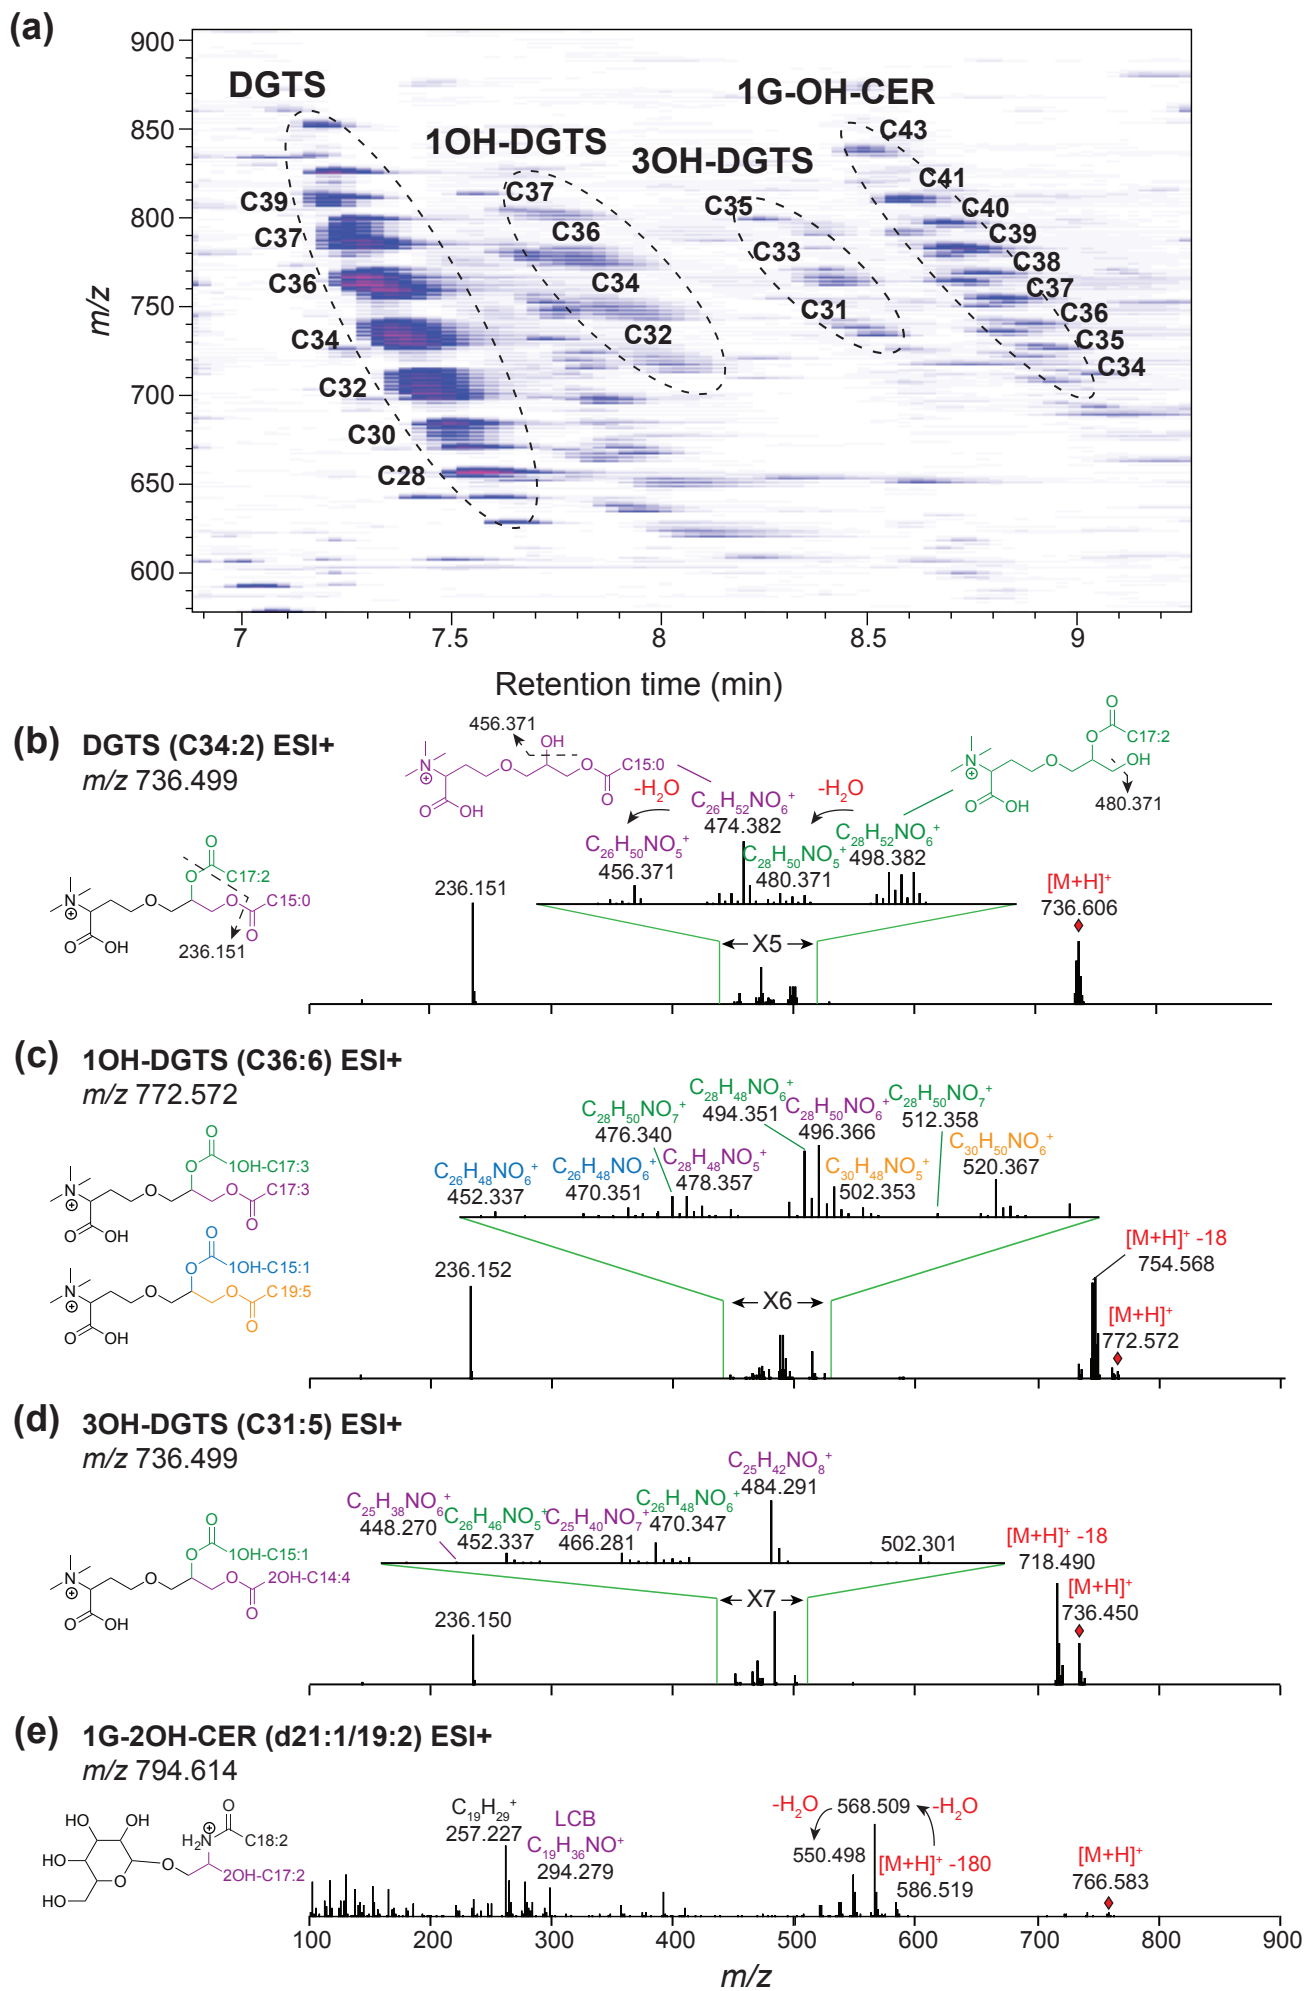

Supplement: Supplementary file 1 [file bg-2018-119-supplement.pdf]
